# Supplementary material for: In silico simulations of occurrence of transcription factor binding sites in bacterial genomes
Source: PubMed Central journal article supplement (PMC6397444; doi:10.1186/s12862-019-1381-8), 2019-03-01

# AraC (*E. coli*)

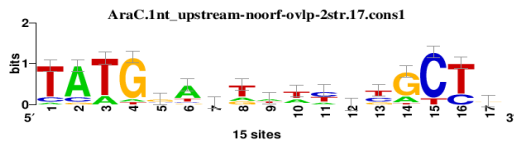

Motif length: 17  
Motif information content: 12.10 bits  
Max possible PSSM score: 20.14  
Motif GC content: 40.39 %  
Genome GC content: 50.79 %

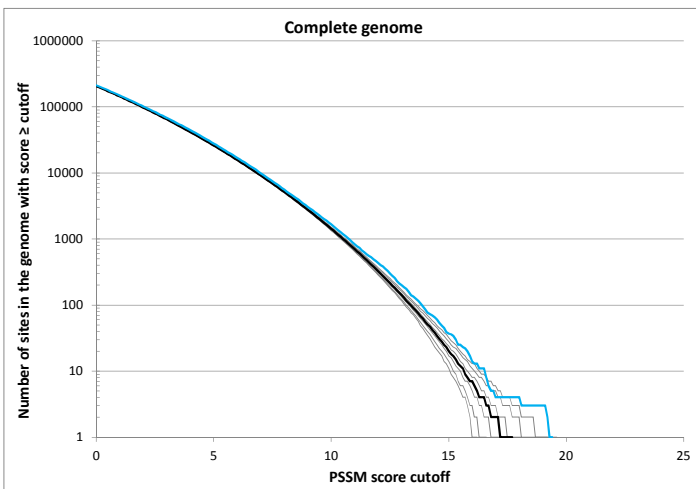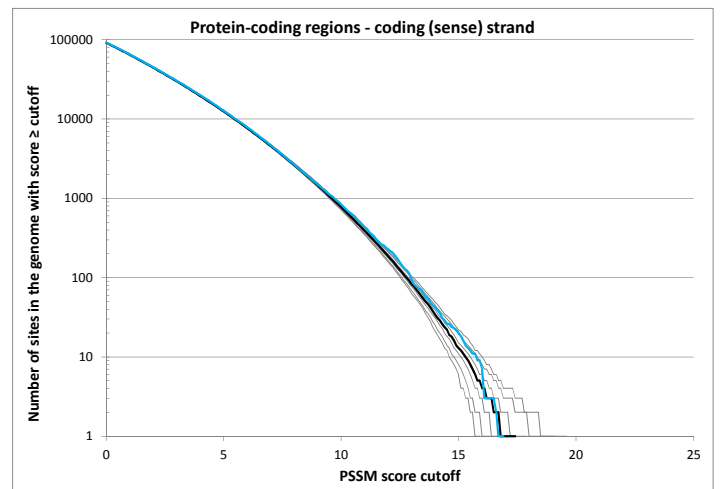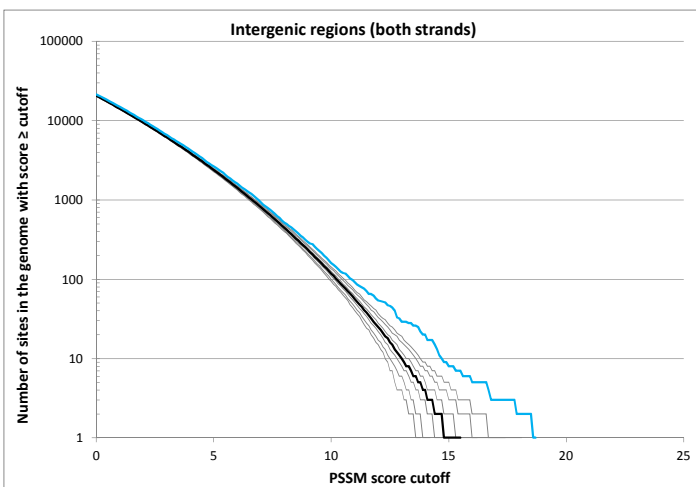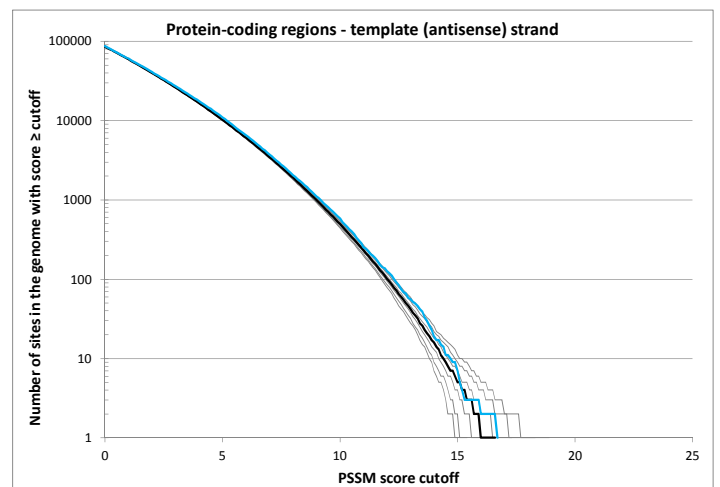

# ArcA (*E. coli*)

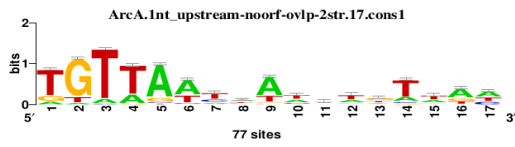

Motif length: 17  
Motif information content: 9.89 bits  
Max possible PSSM score: 20.27  
Motif GC content: 24.37 %  
Genome GC content: 50.79 %

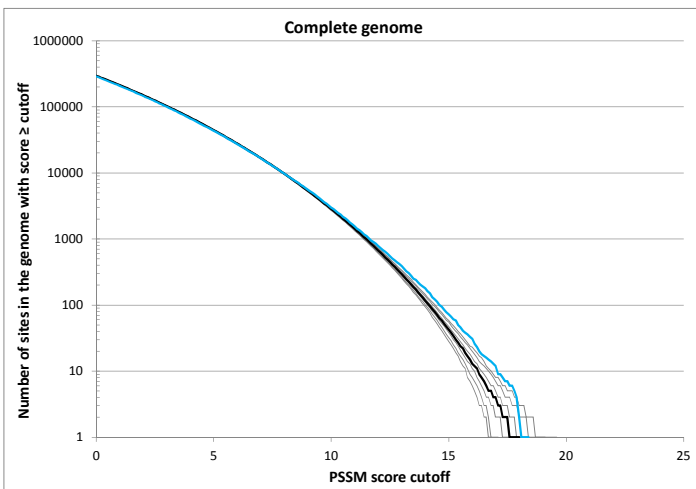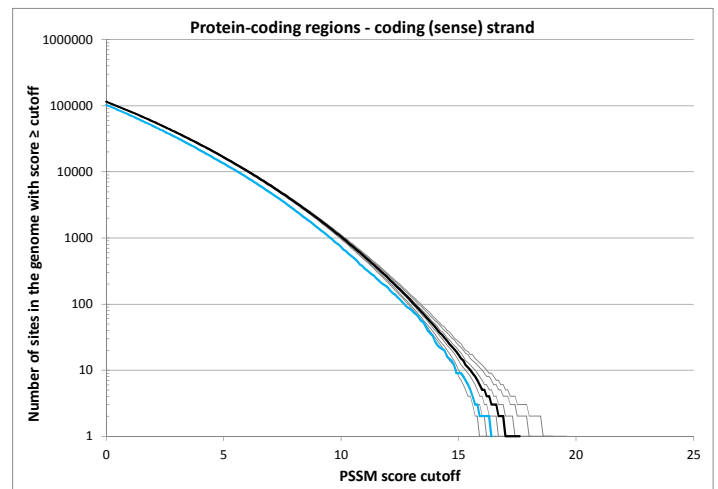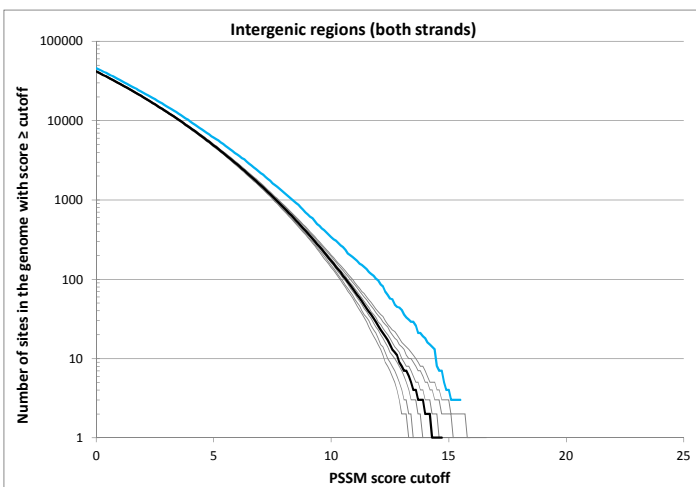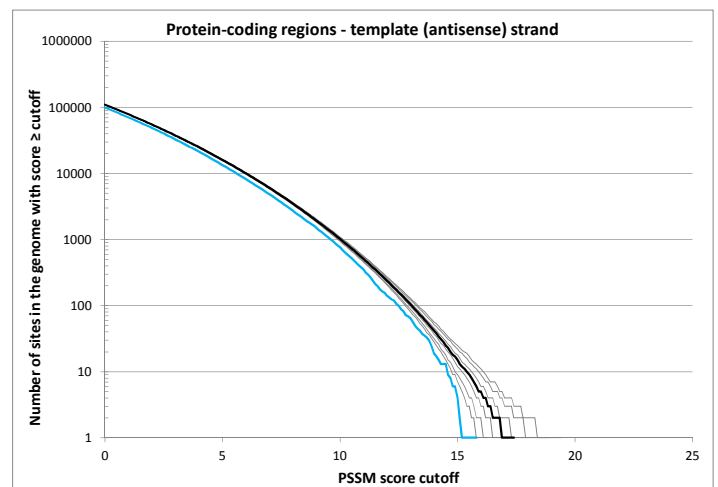

# ArgP (*E. coli*)

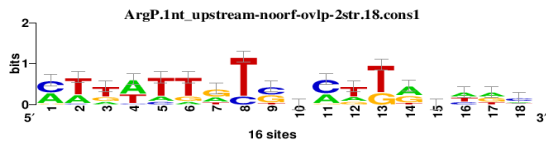

Motif length: 18  
 Motif information content: 11.27 bits  
 Max possible PSSM score: 18.58  
 Motif GC content: 34.72 %  
 Genome GC content: 50.79 %

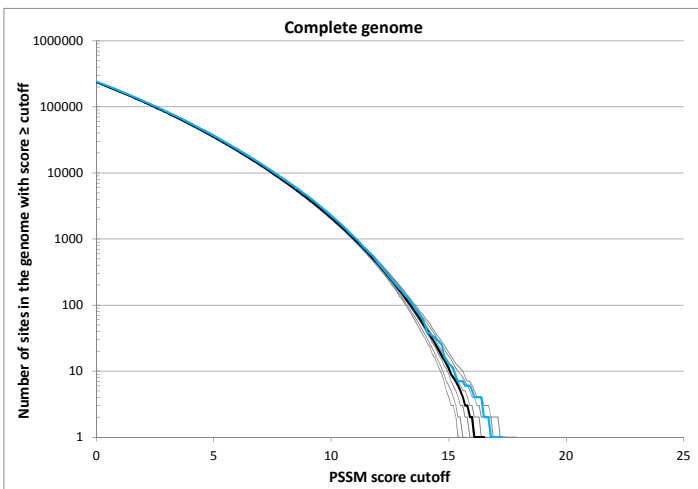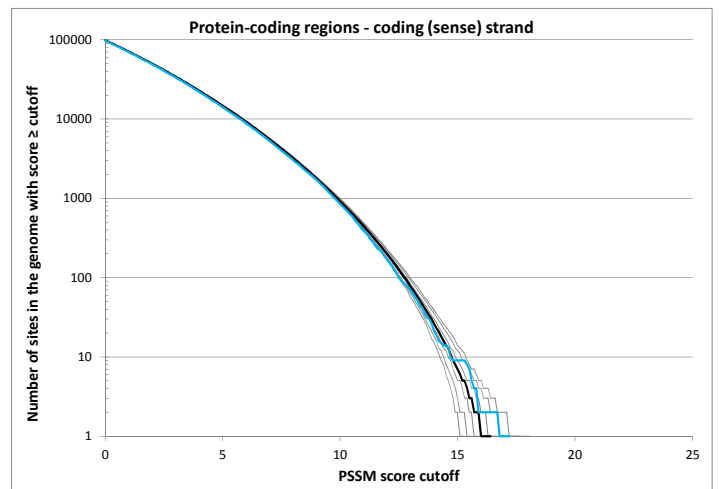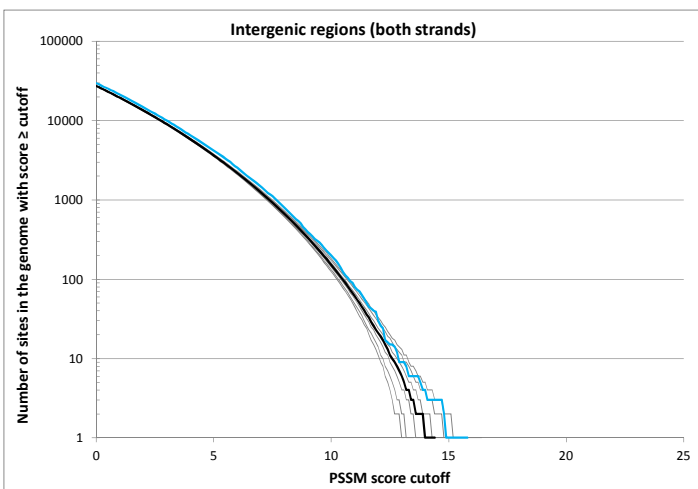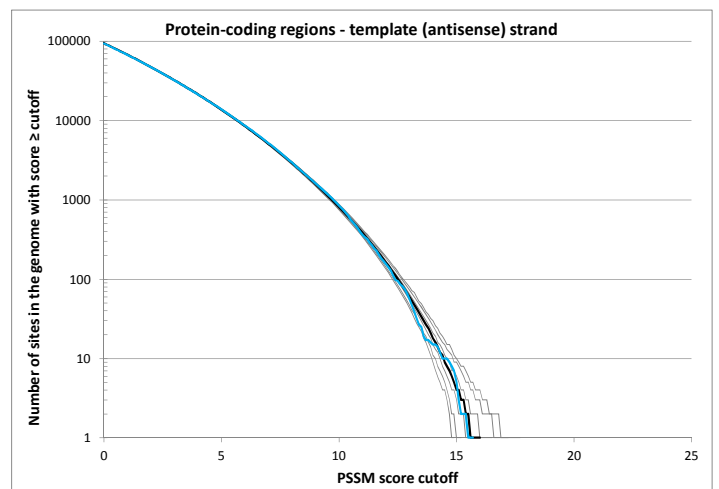

# ArgR (*E. coli*)

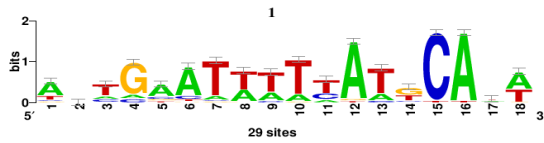

Motif length: 18  
Motif information content: 15.75 bits  
Max possible PSSM score: 24.59  
Motif GC content: 25.29 %  
Genome GC content: 50.79 %

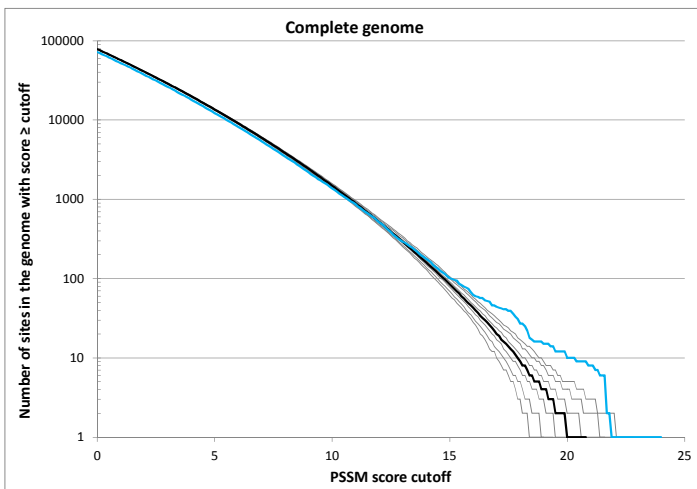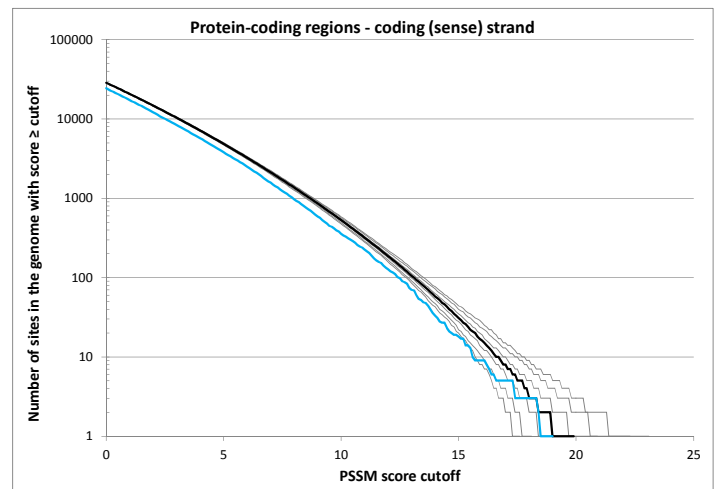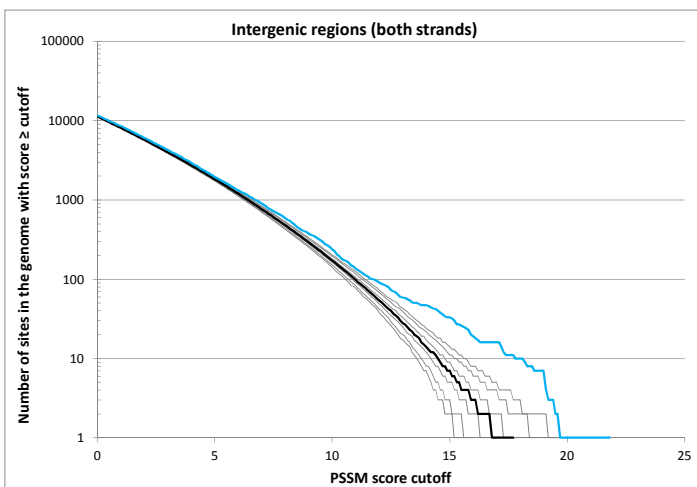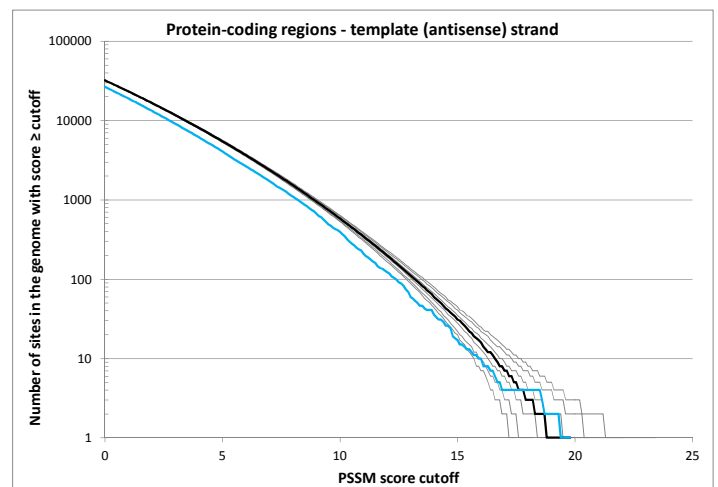

# CpxR (*E. coli*)

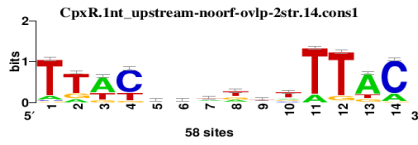

Motif length: 14  
Motif information content: 9.00 bits  
Max possible PSSM score: 16.98  
Motif GC content: 31.40 %  
Genome GC content: 50.79 %

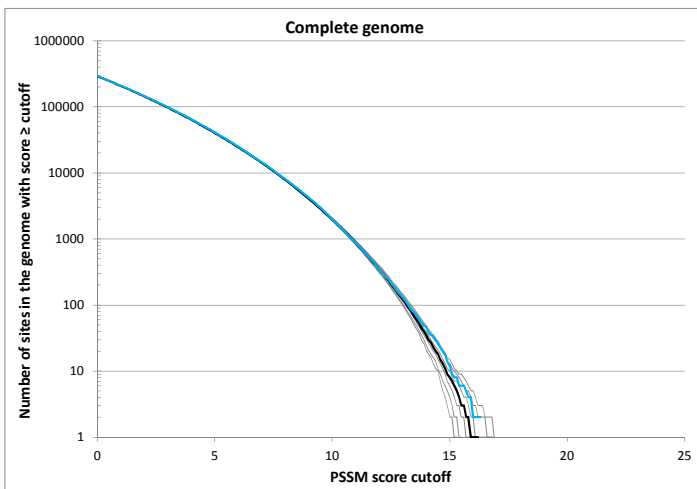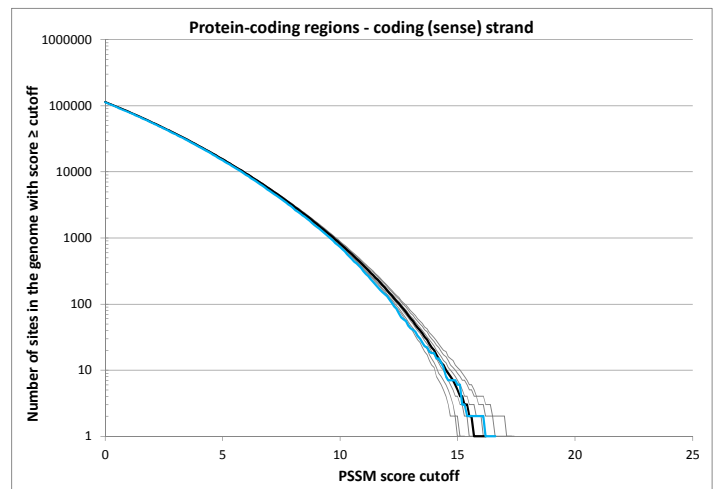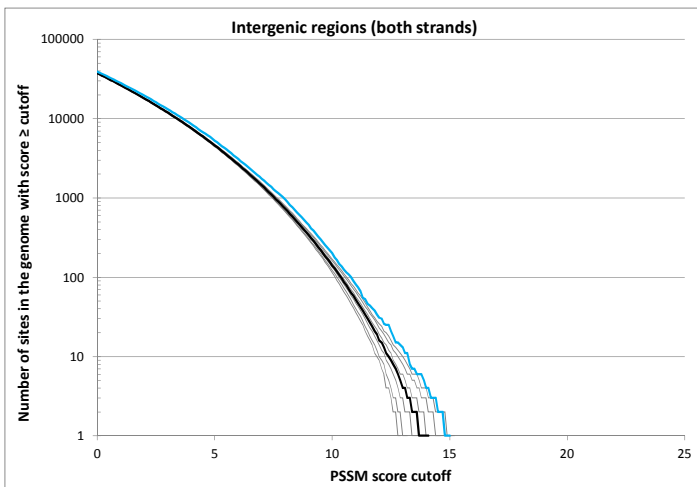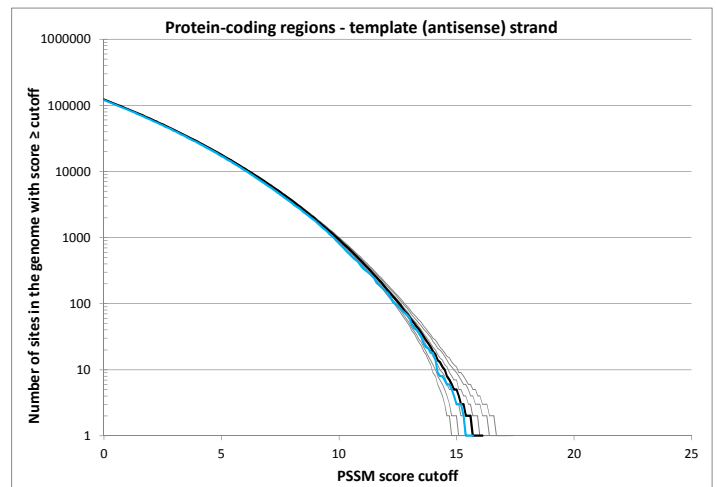

# Cra (*E. coli*)

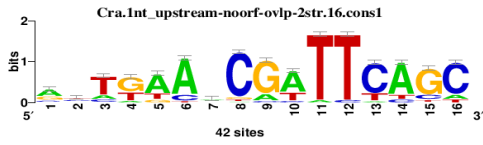

Motif length: 16  
Motif information content: 14.68 bits  
Max possible PSSM score: 23.24  
Motif GC content: 41.07 %  
Genome GC content: 50.79 %

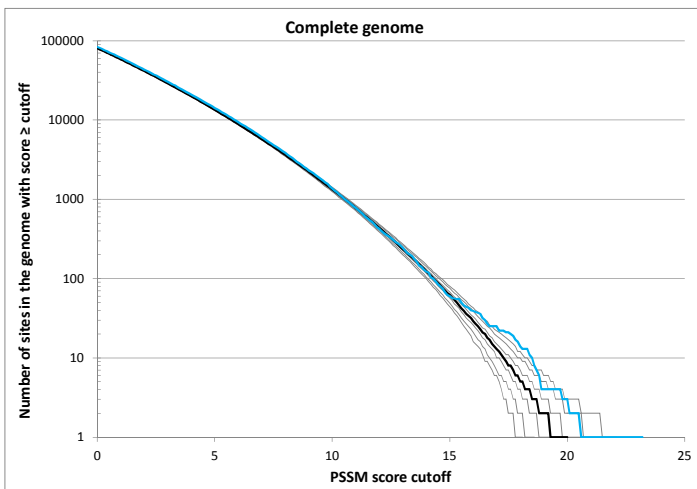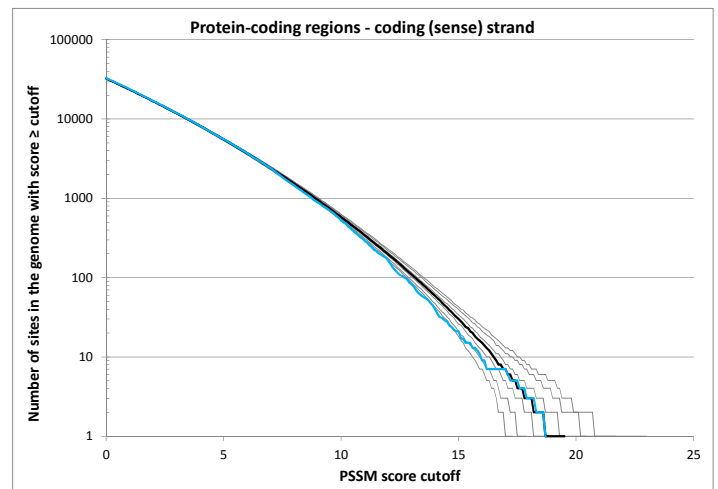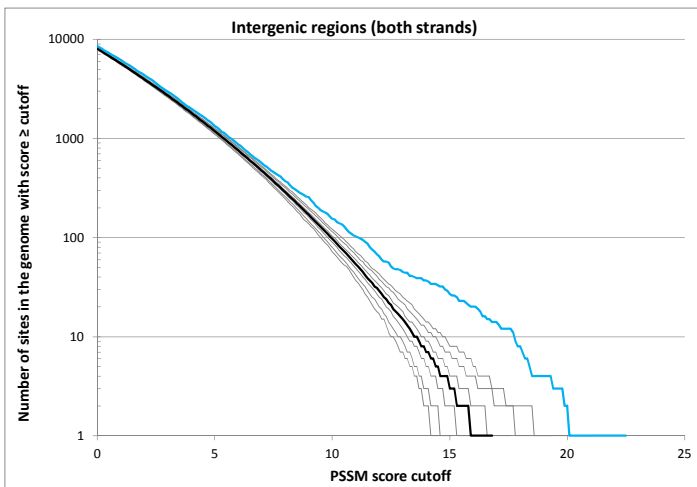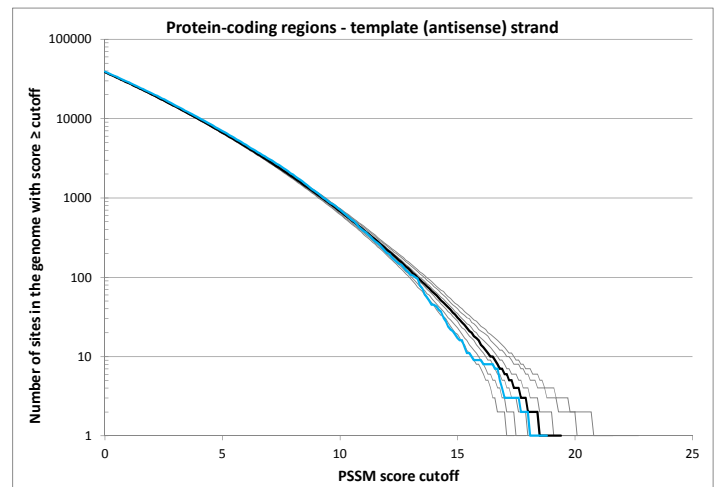

# Crp (*E. coli*)

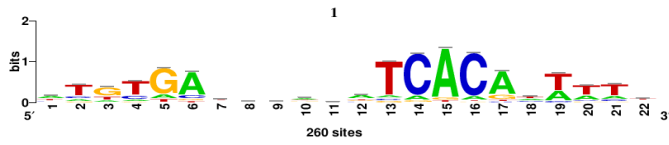

Motif length: 22  
Motif information content: 11.31 bits  
Max possible PSSM score: 25.13  
Motif GC content: 36.94 %  
Genome GC content: 50.79 %

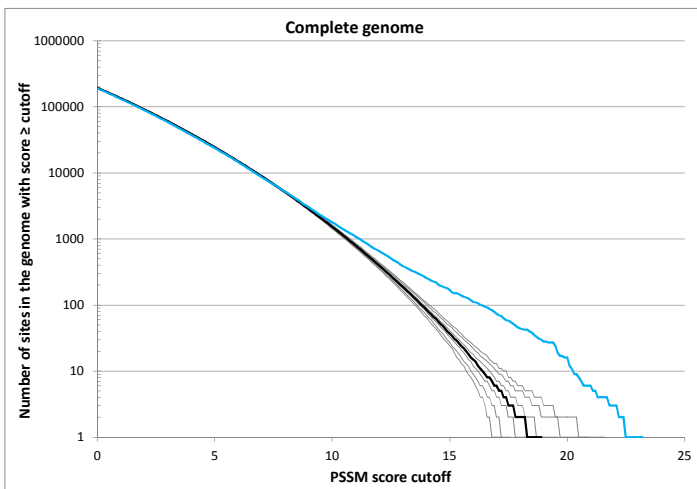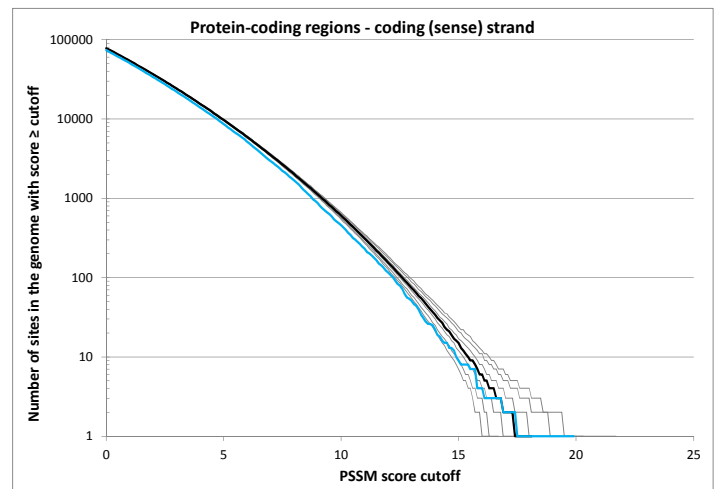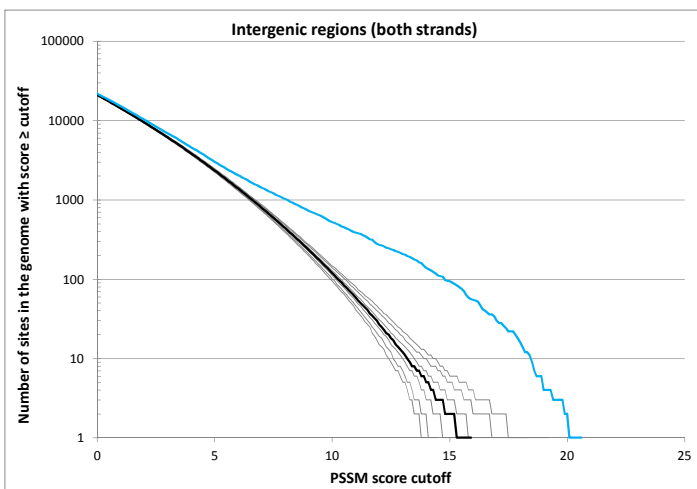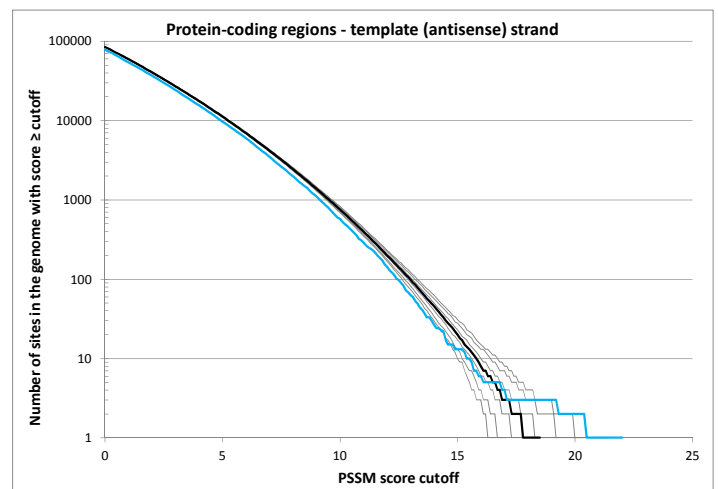

# CsgD (*E. coli*)

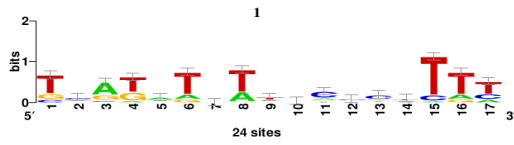

Motif length: 17  
Motif information content: 8.41 bits  
Max possible PSSM score: 18.87  
Motif GC content: 35.78 %  
Genome GC content: 50.79 %

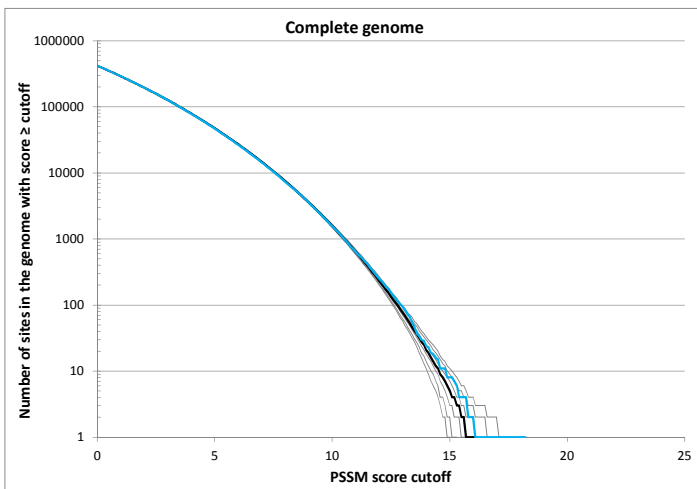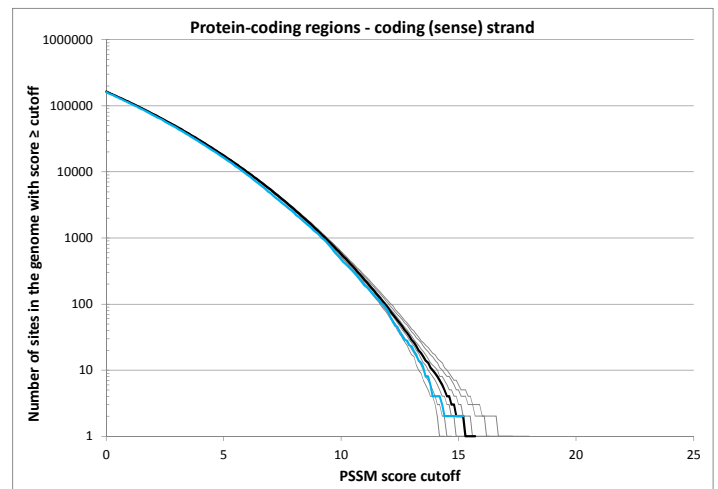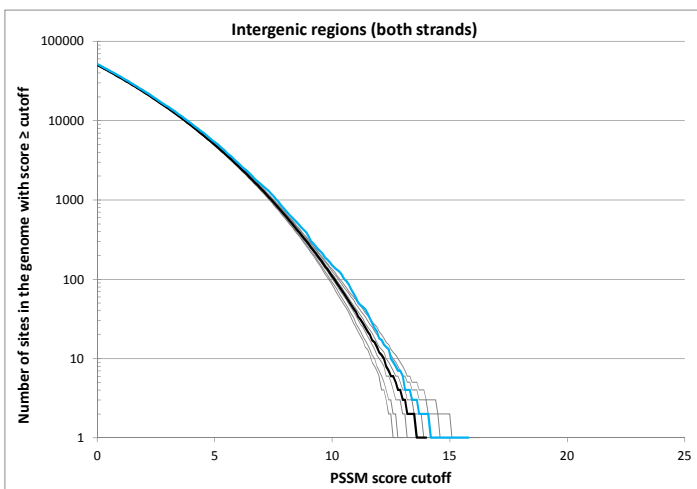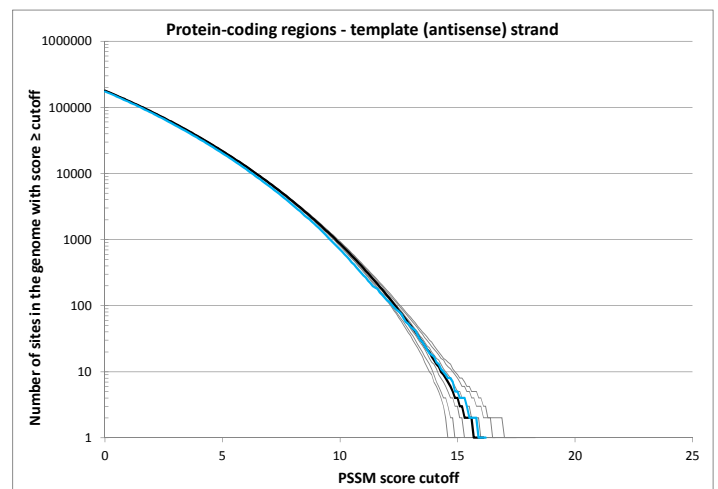





# CytR (*E. coli*)

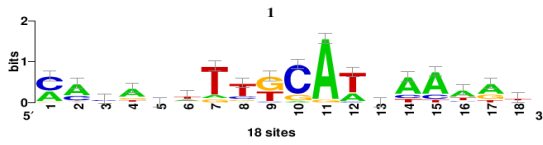

Motif length: 18  
Motif information content: 11.33 bits  
Max possible PSSM score: 21.23  
Motif GC content: 33.64 %  
Genome GC content: 50.79 %

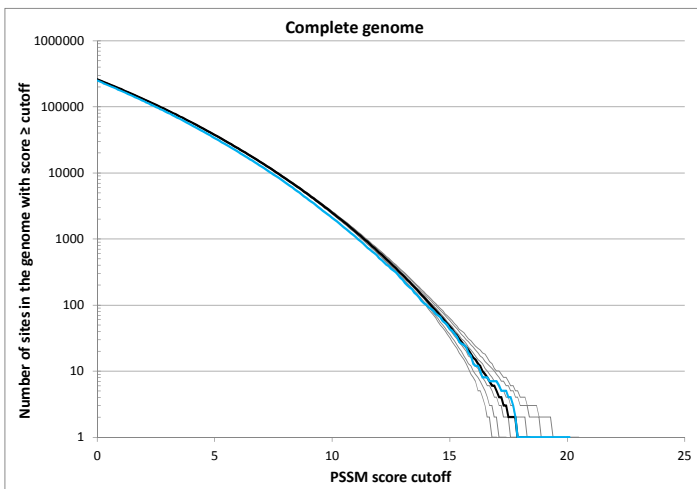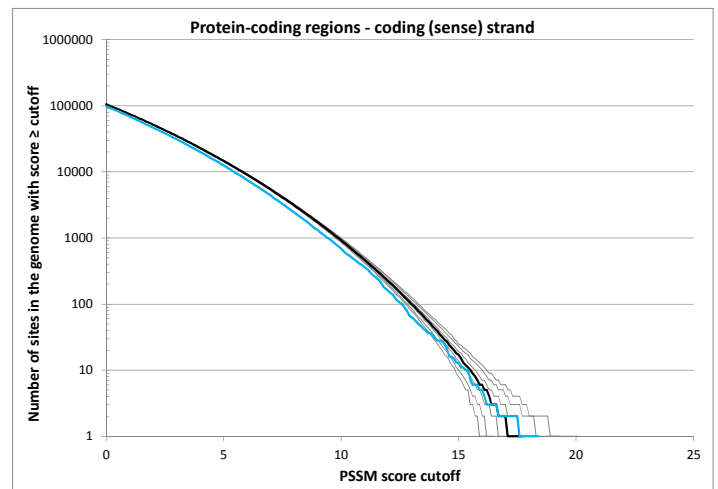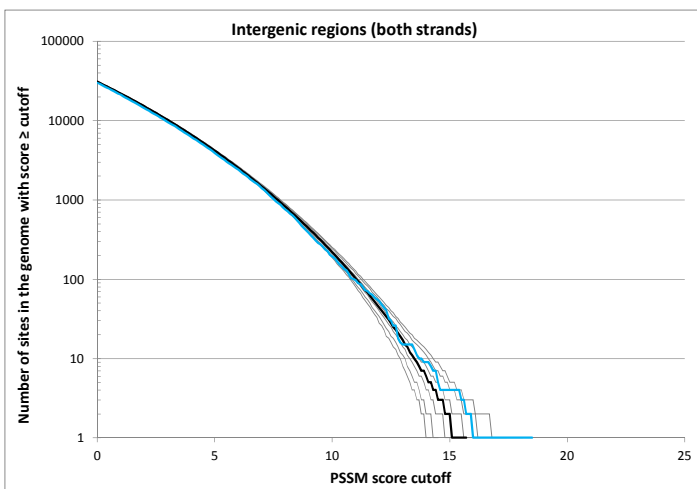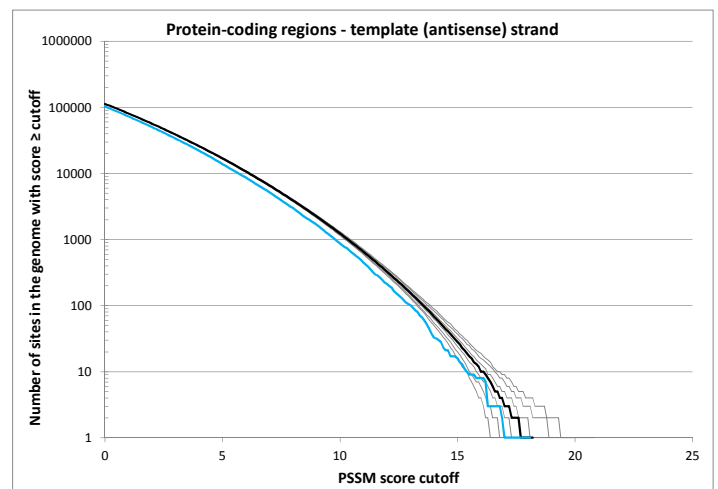

# DnaA (*E. coli*)

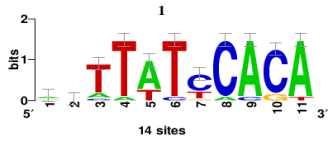

Motif length: 11  
Motif information content: 13.01 bits  
Max possible PSSM score: 16.70  
Motif GC content: 32.47 %  
Genome GC content: 50.79 %

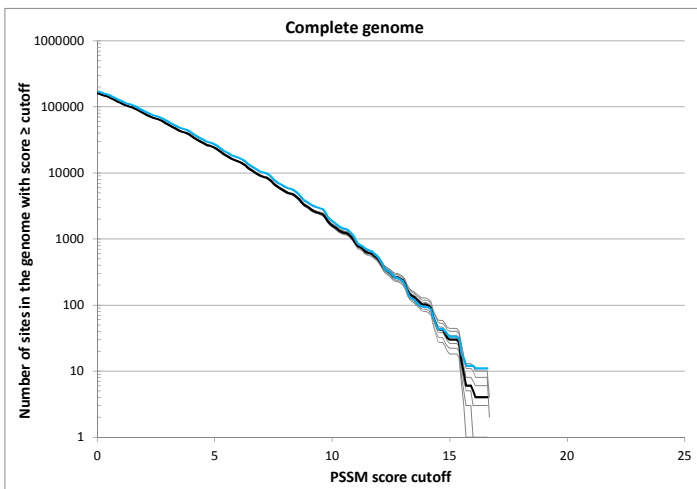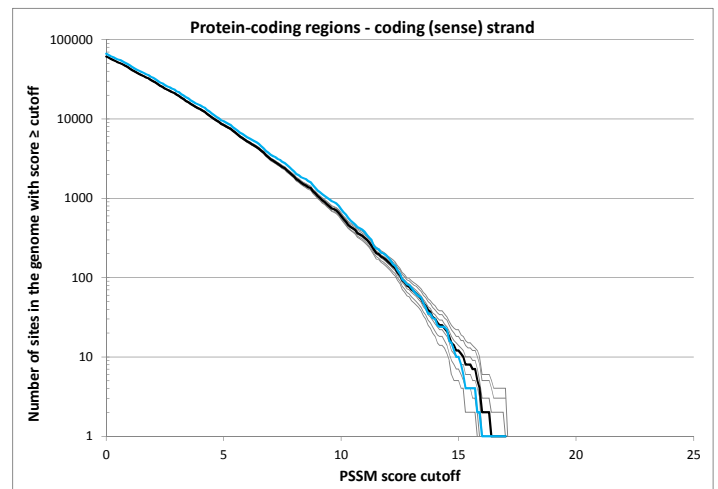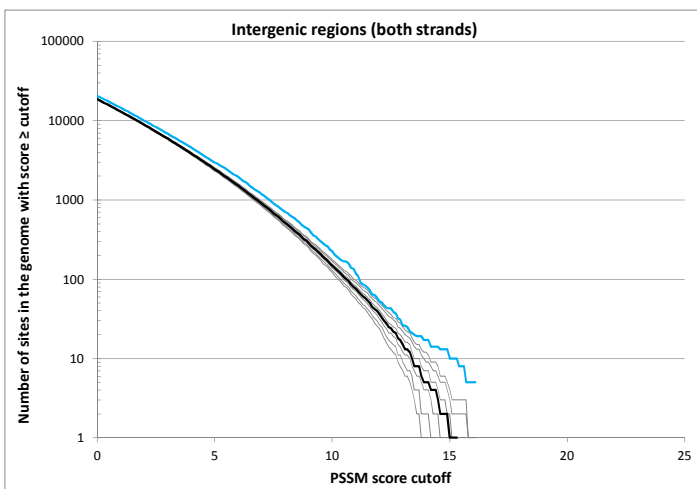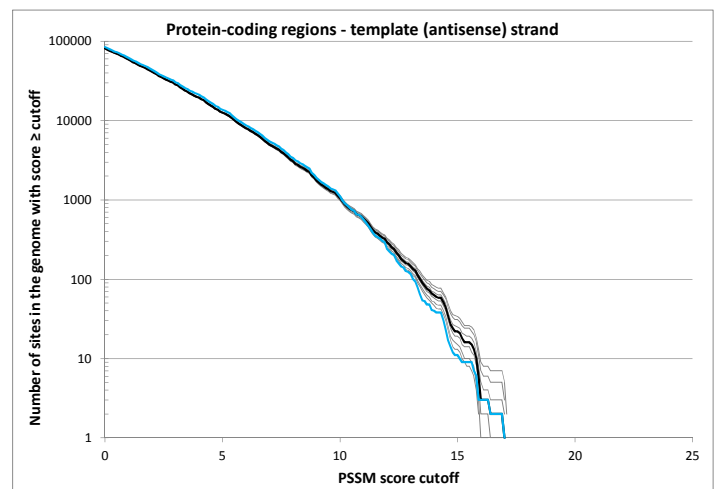

# FadR (*E. coli*)

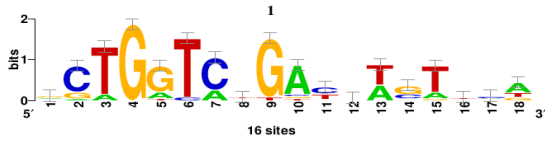

Motif length: 18  
Motif information content: 15.65 bits  
Max possible PSSM score: 23.41  
Motif GC content: 49.31 %  
Genome GC content: 50.79 %

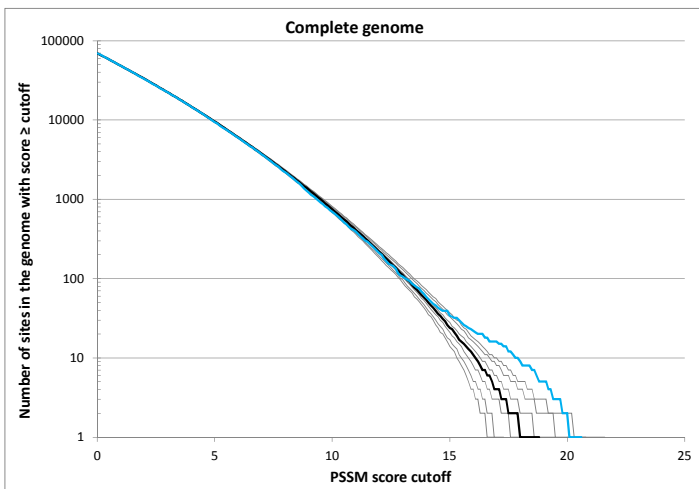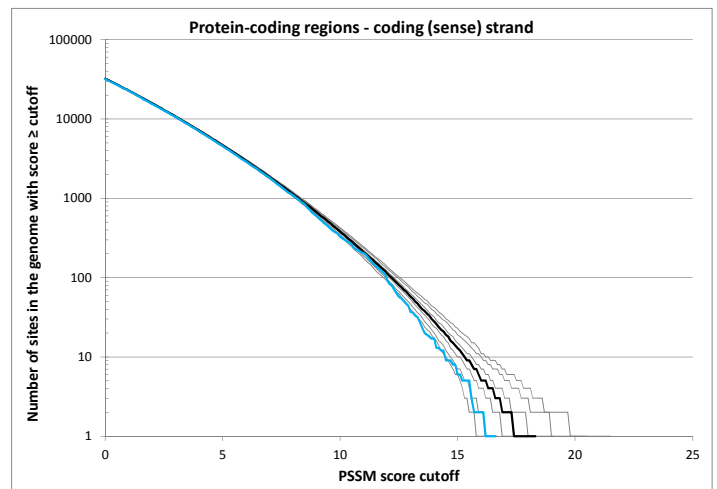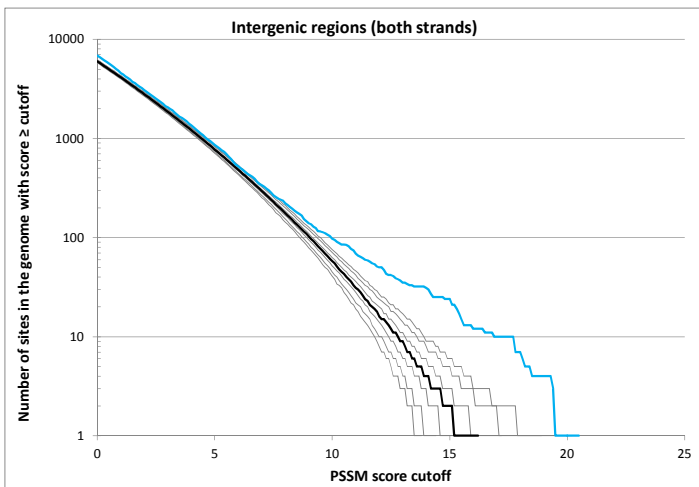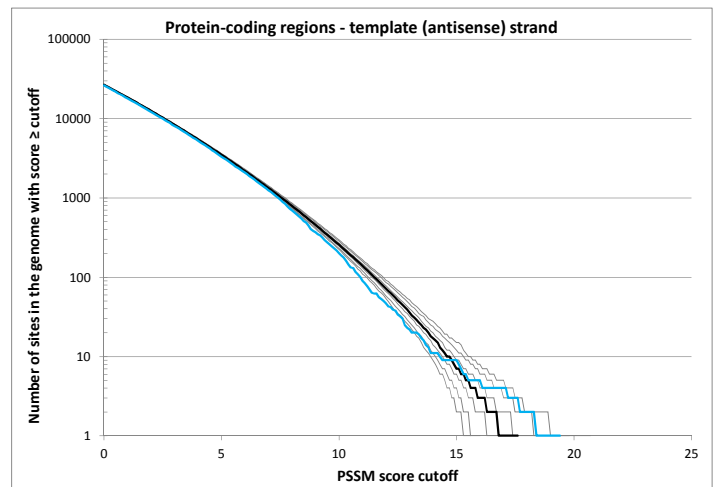

# Fis (*E. coli*)

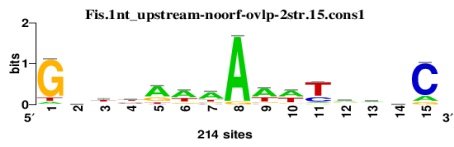

Motif length: 15  
 Motif information content: 6.87 bits  
 Max possible PSSM score: 15.00  
 Motif GC content: 39.41 %  
 Genome GC content: 50.79 %

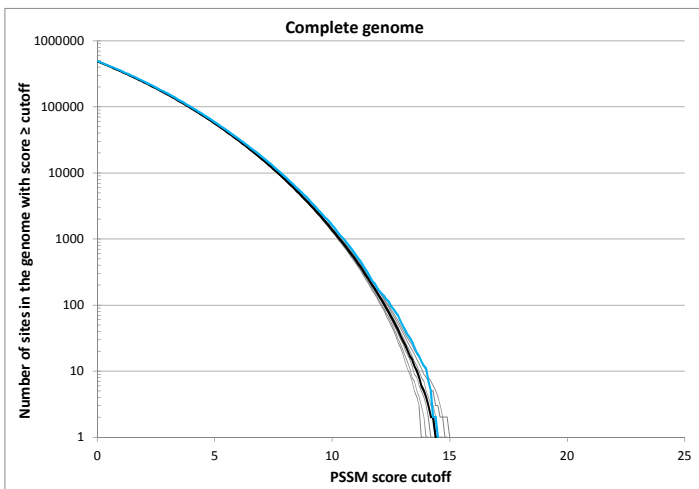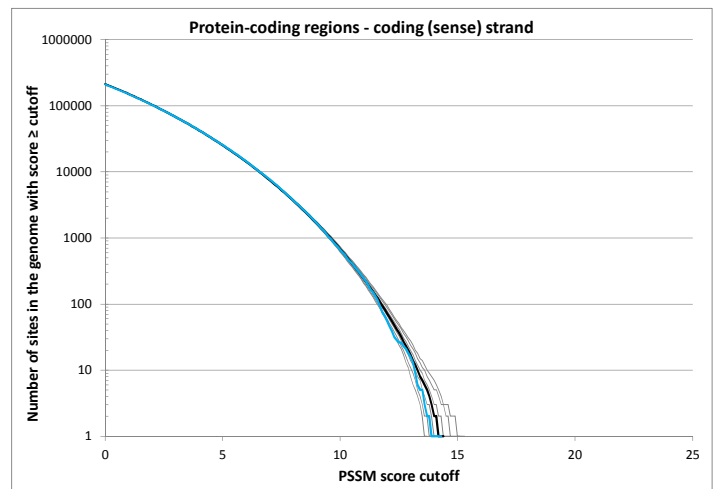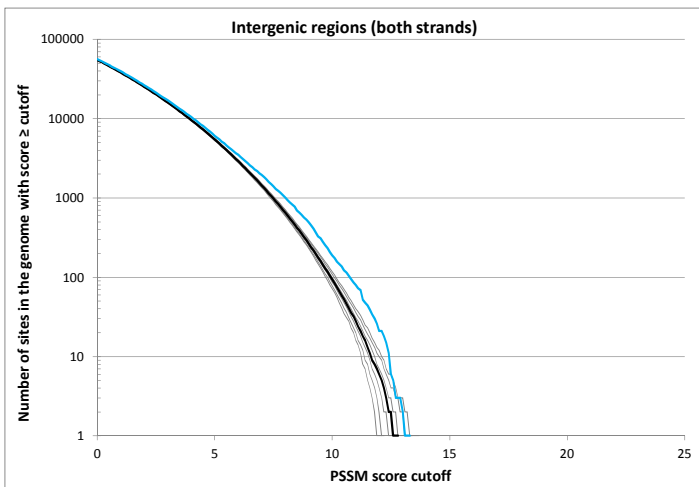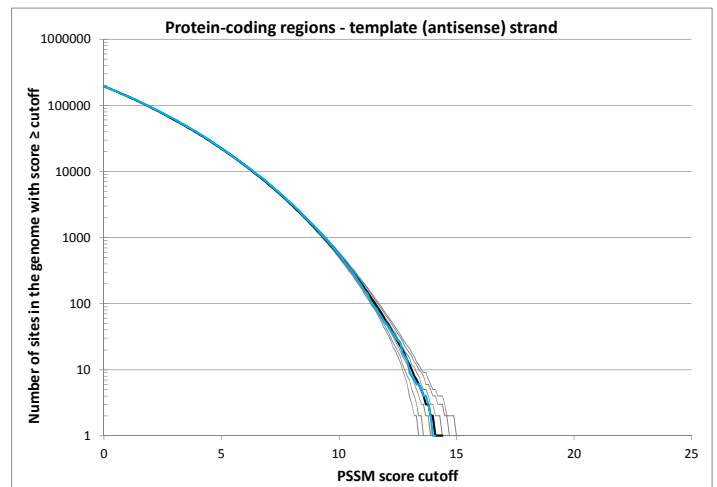



# FNR (*E. coli*)

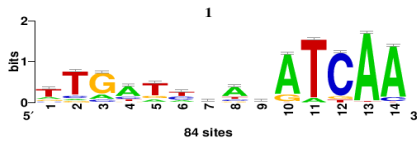

Motif length: 14  
Motif information content: 11.06 bits  
Max possible PSSM score: 19.17  
Motif GC content: 30.10 %  
Genome GC content: 50.79 %

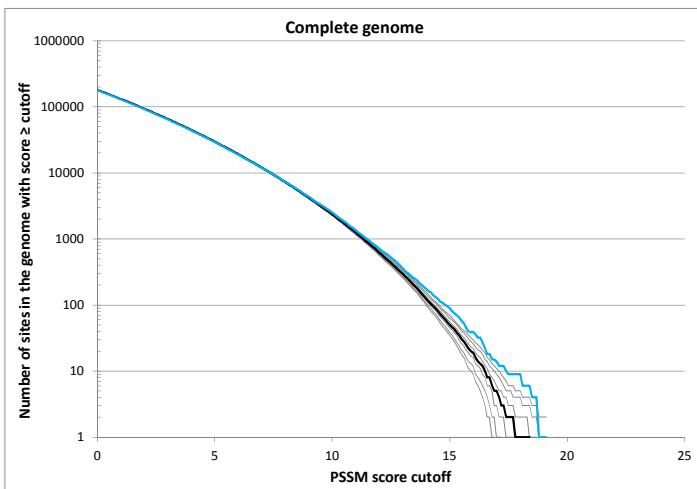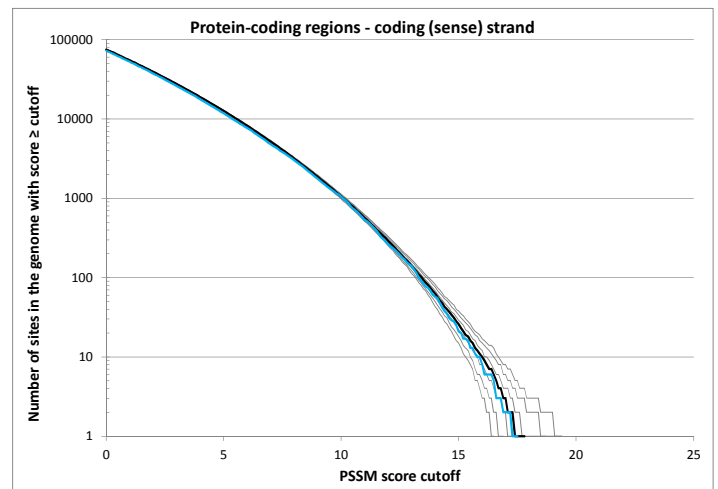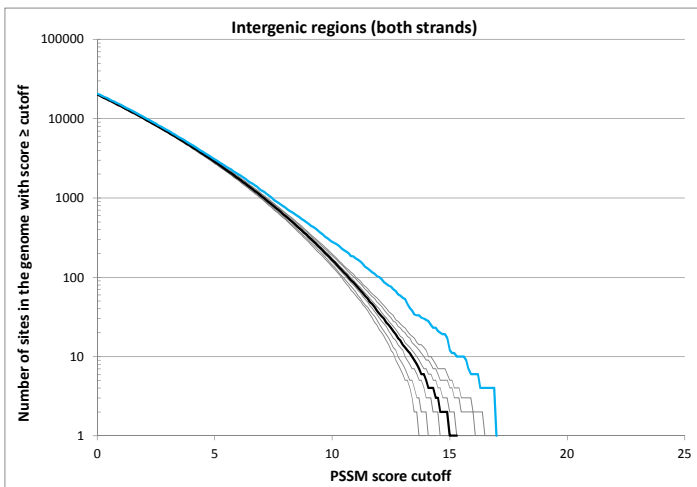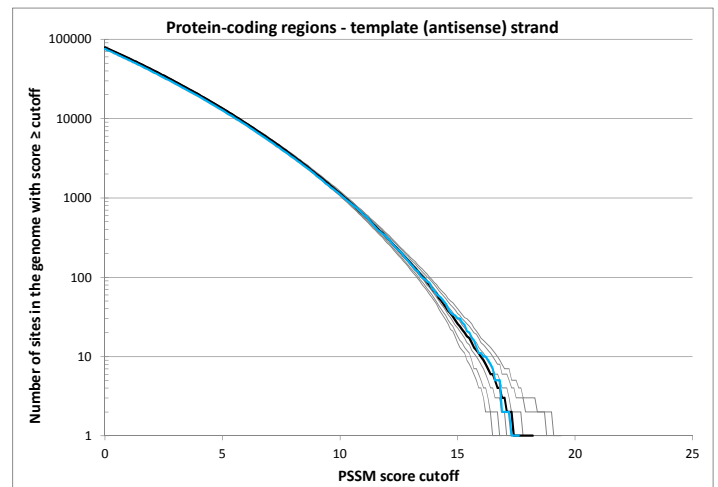

# FNR (*R. sphaeroides*)

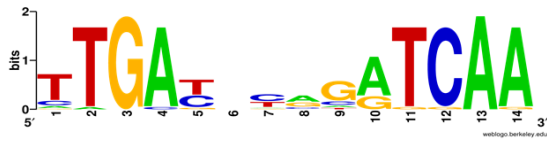

Motif length: 14  
Motif information content: 17.13 bits  
Max possible PSSM score: 26.44  
Motif GC content: 39.95 %  
Genome GC content: 69.01 %

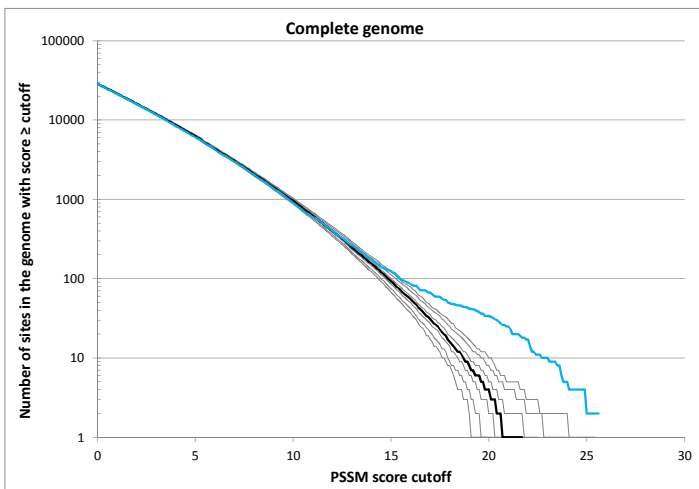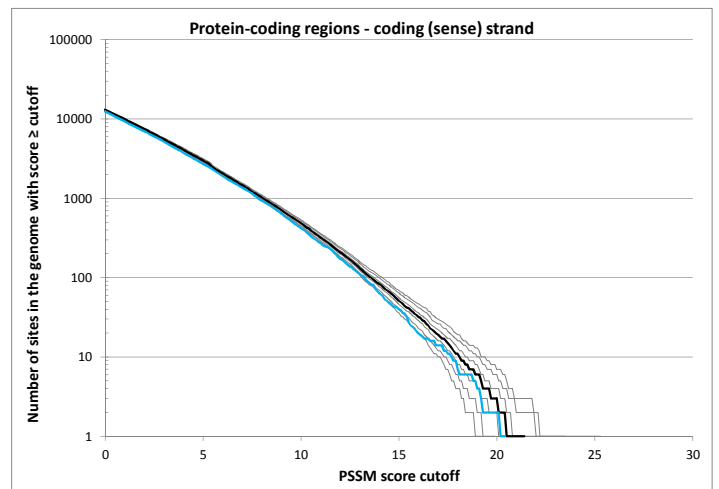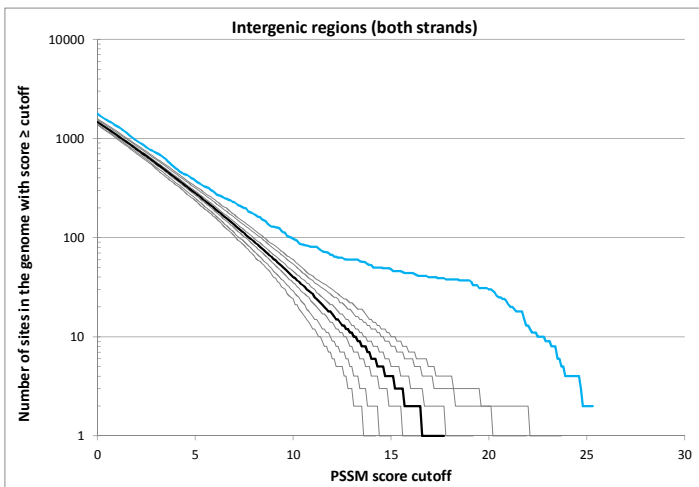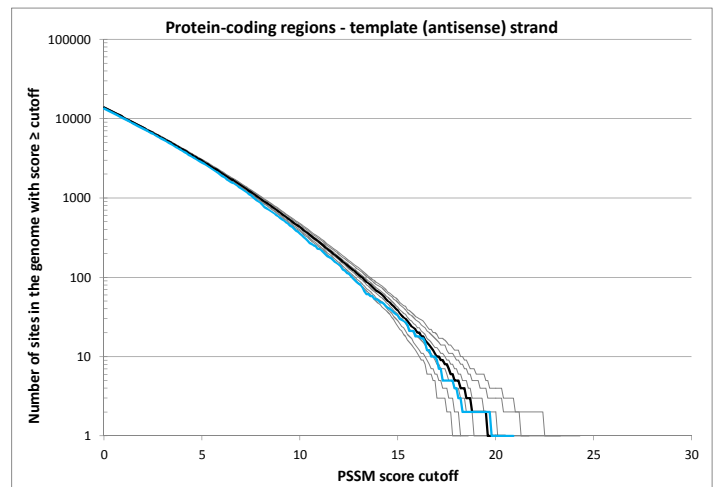



# Fur (*E. coli*)

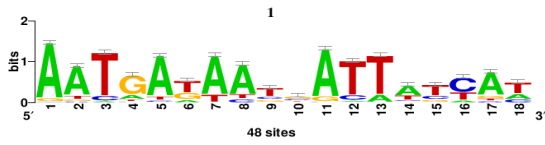

Motif length: 18  
Motif information content: 15.78 bits  
Max possible PSSM score: 26.69  
Motif GC content: 24.19 %  
Genome GC content: 50.79 %

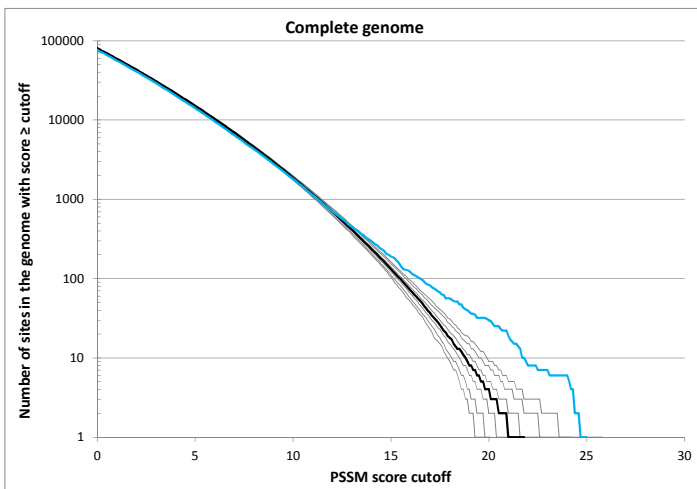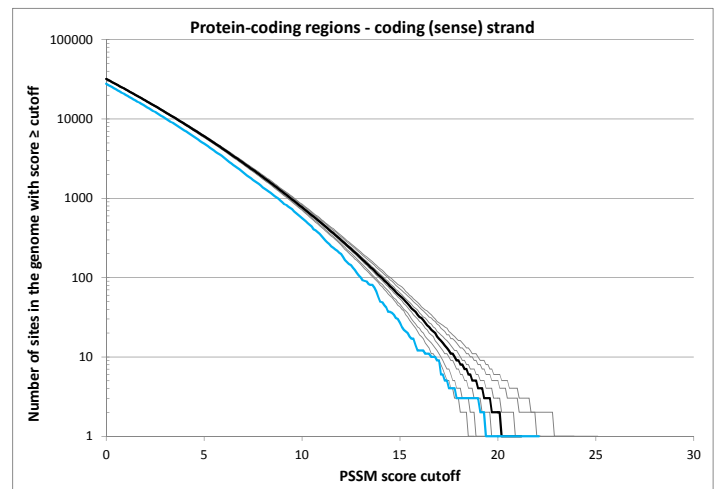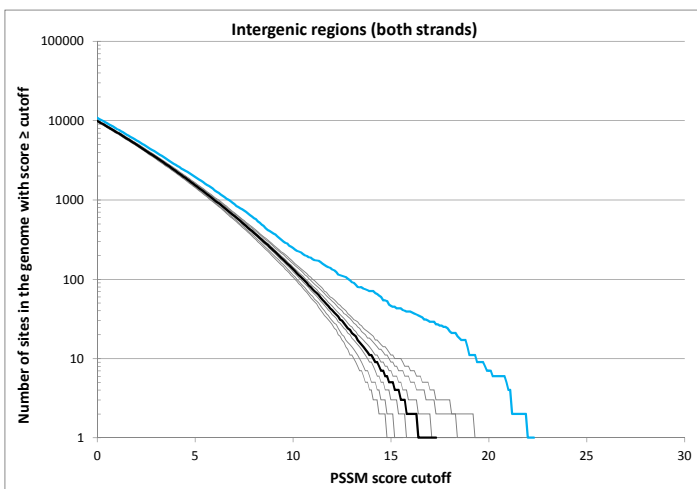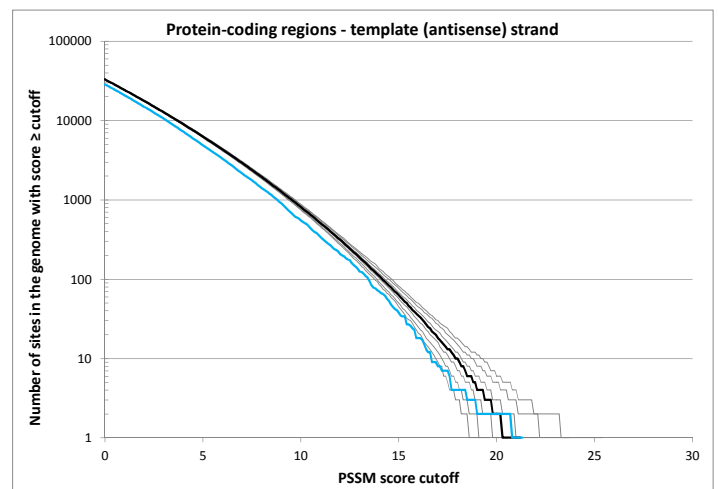



# GadX (*E. coli*)

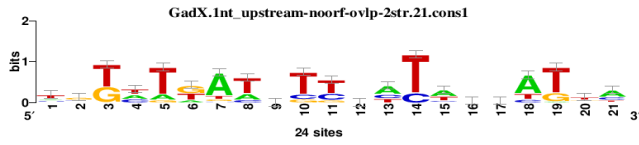

Motif length: 21  
Motif information content: 11.33 bits  
Max possible PSSM score: 22.78  
Motif GC content: 30.36 %  
Genome GC content: 50.79 %

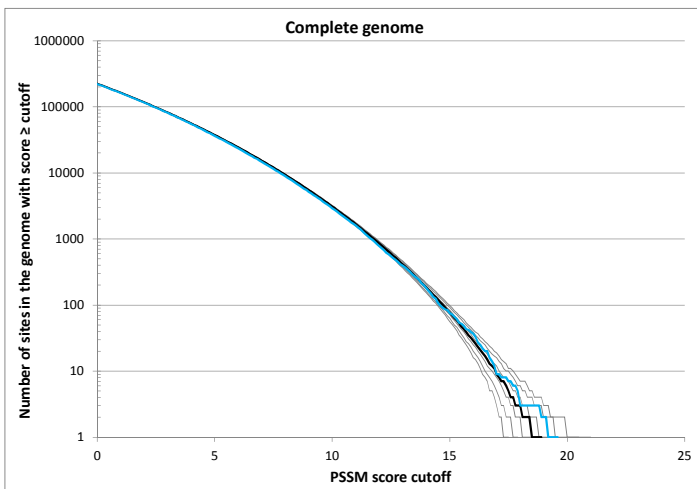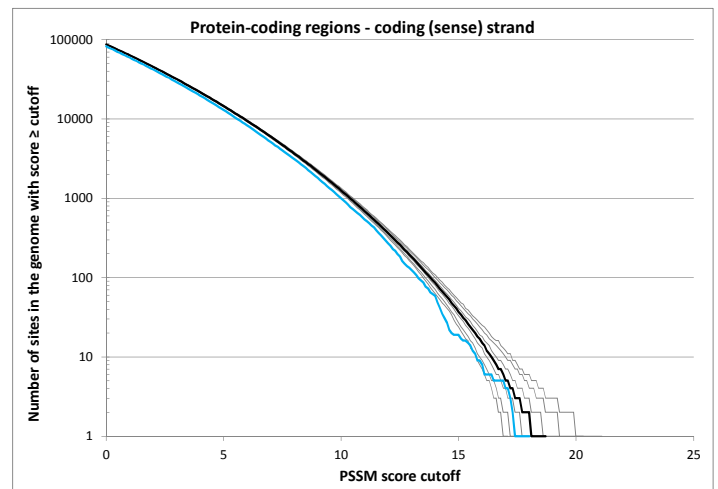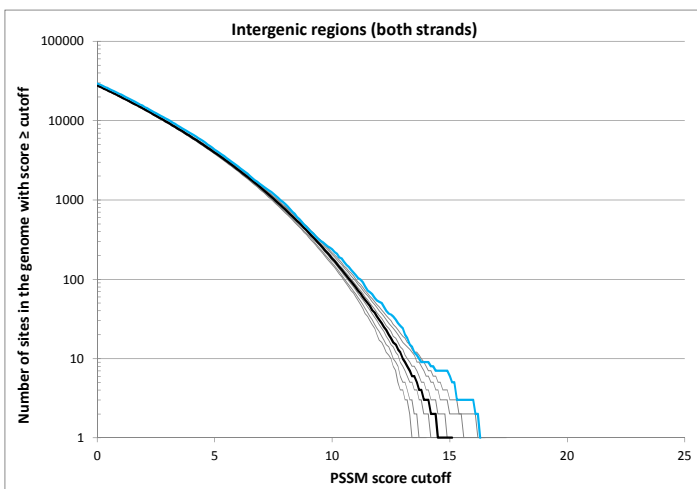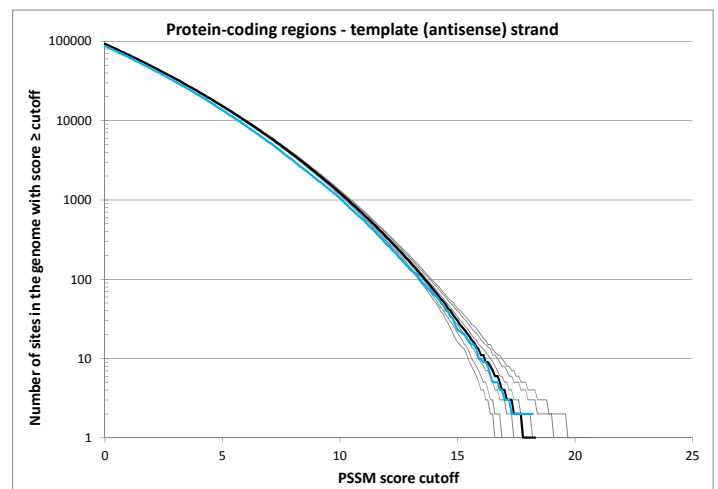

# GalR (*E. coli*)

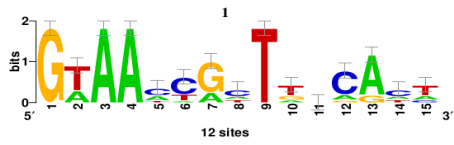

Motif length: 15  
Motif information content: 16.27 bits  
Max possible PSSM score: 20.83  
Motif GC content: 39.44 %  
Genome GC content: 50.79 %

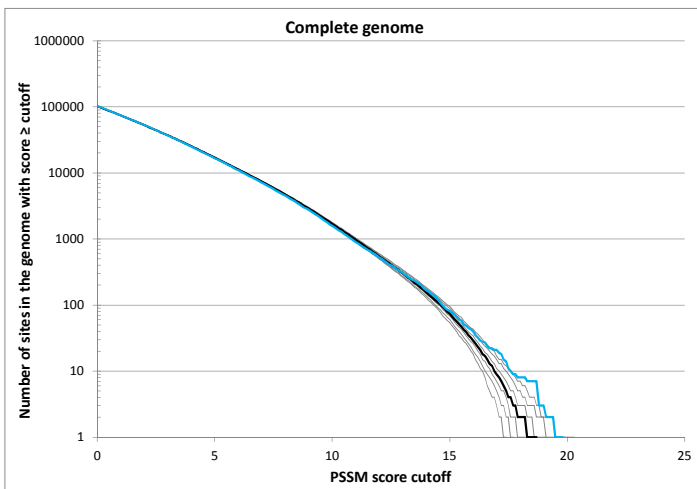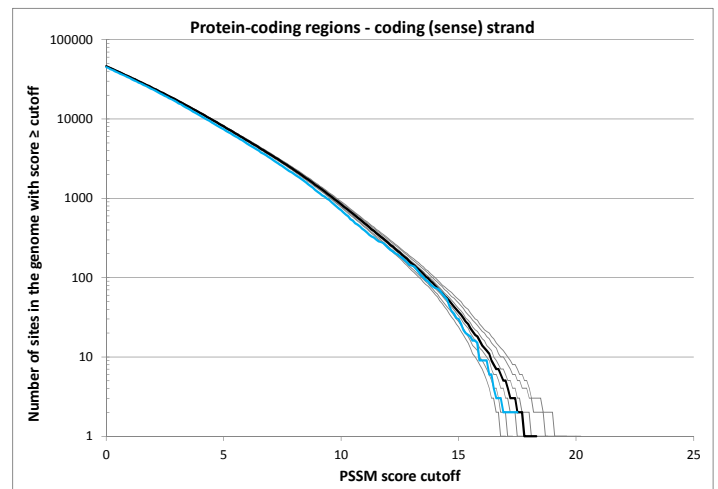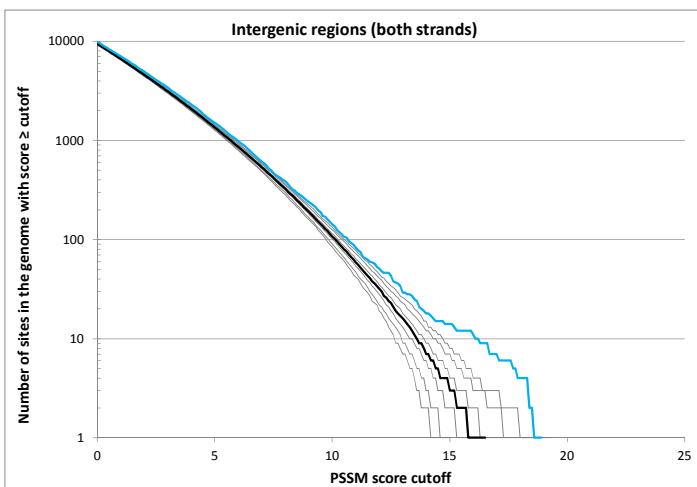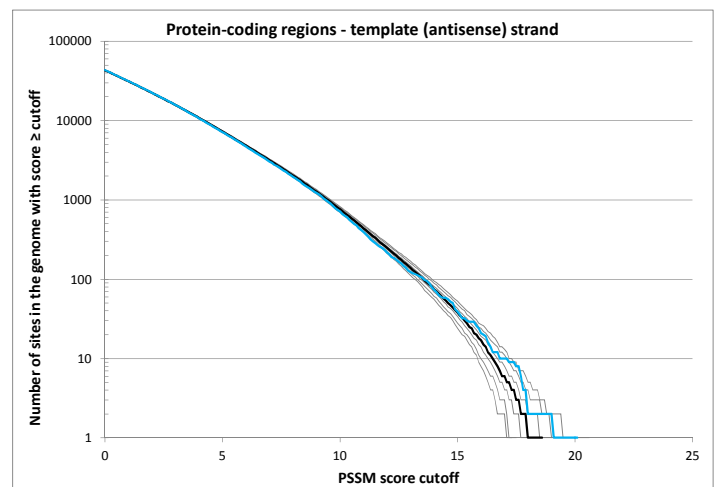

# GlpR (*E. coli*)

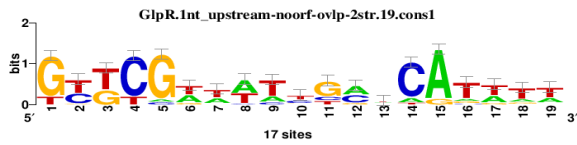

Motif length: 19  
Motif information content: 15.30 bits  
Max possible PSSM score: 23.98  
Motif GC content: 39.63 %  
Genome GC content: 50.79 %

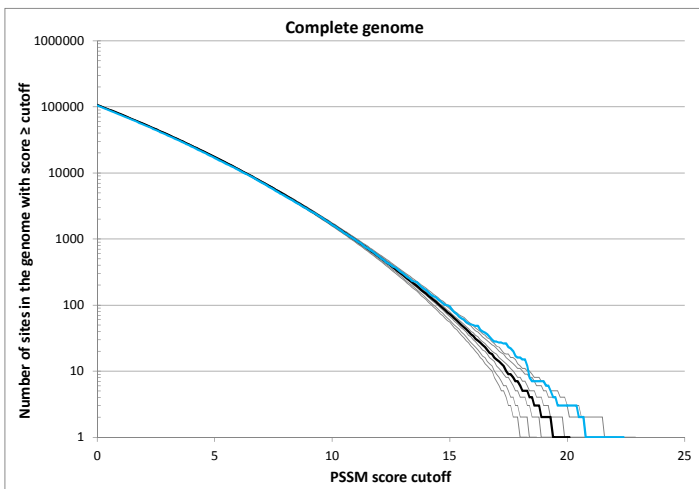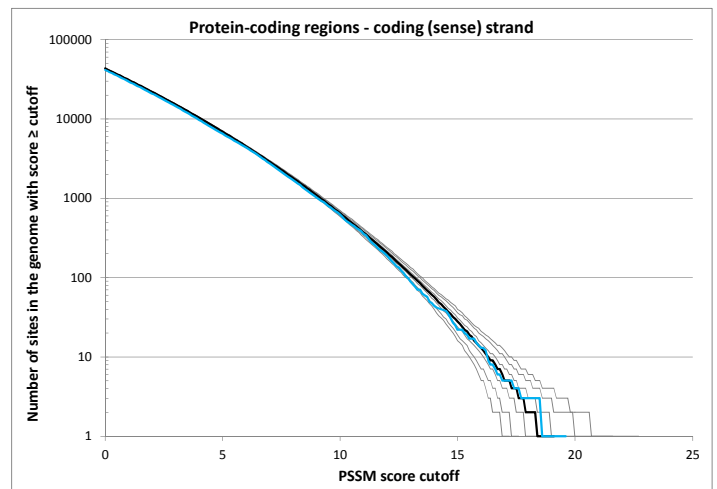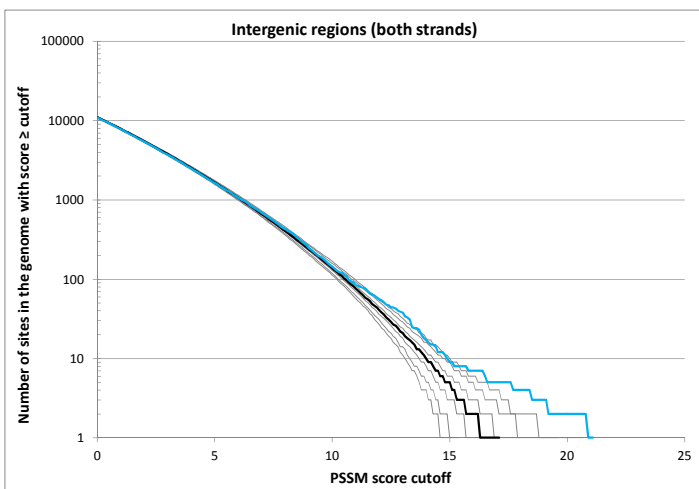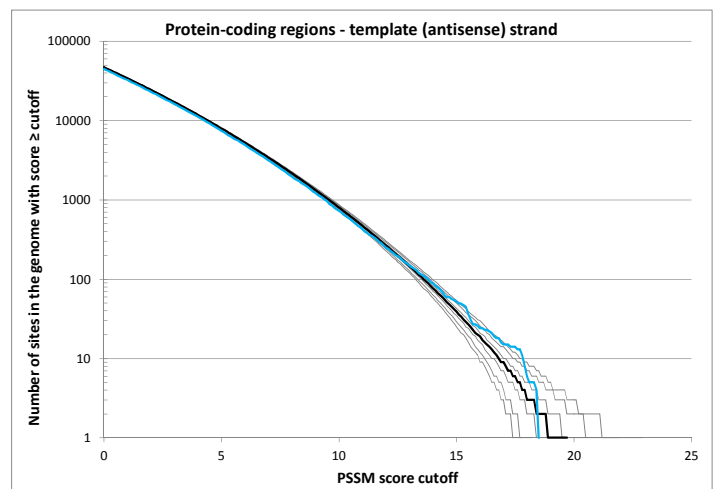

# H-NS (*E. coli*)

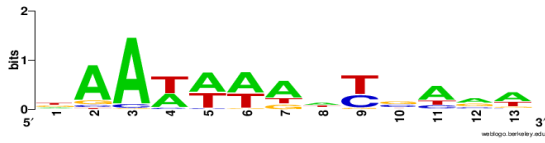

Motif length: 13  
Motif information content: 8.22 bits  
Max possible PSSM score: 14.84  
Motif GC content: 24.39 %  
Genome GC content: 50.79 %

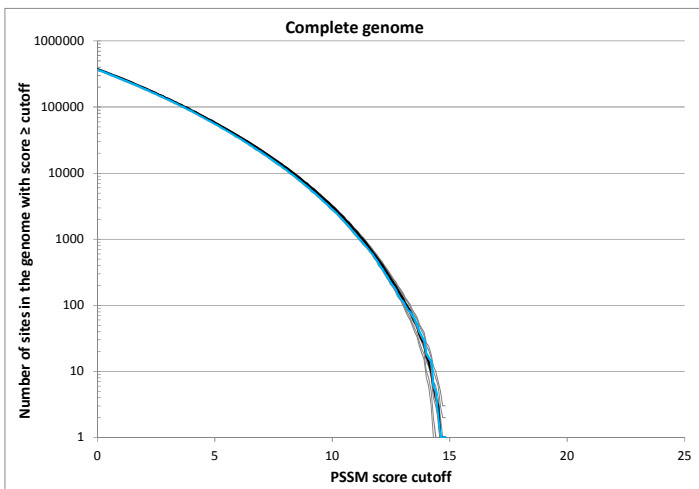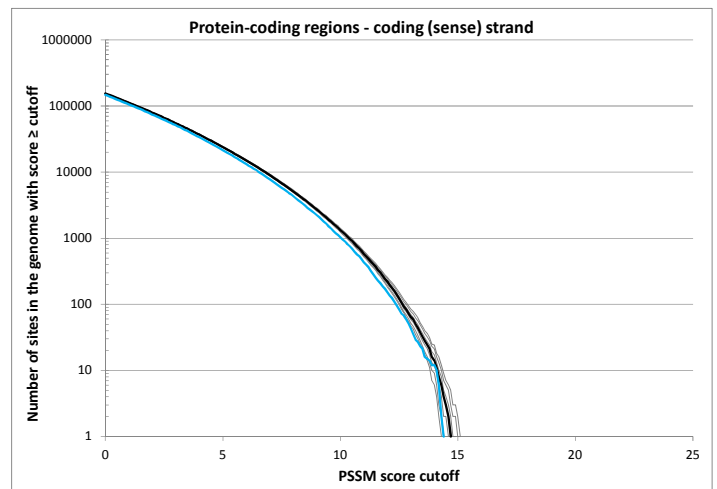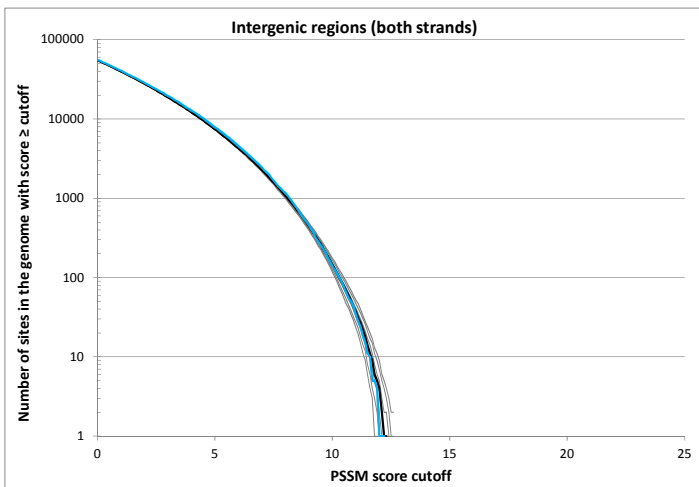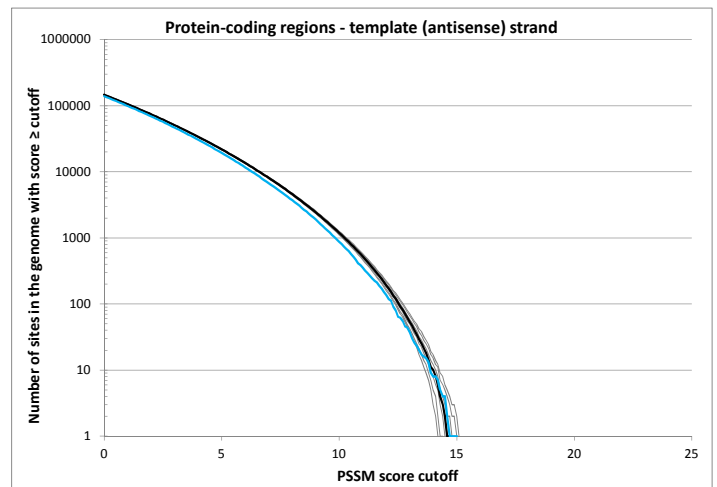

# IHF (*E. coli*)

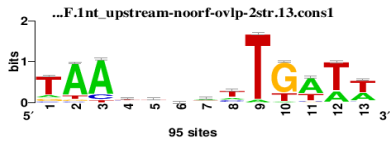

Motif length: 13  
Motif information content: 8.39 bits  
Max possible PSSM score: 15.85  
Motif GC content: 25.83 %  
Genome GC content: 50.79 %

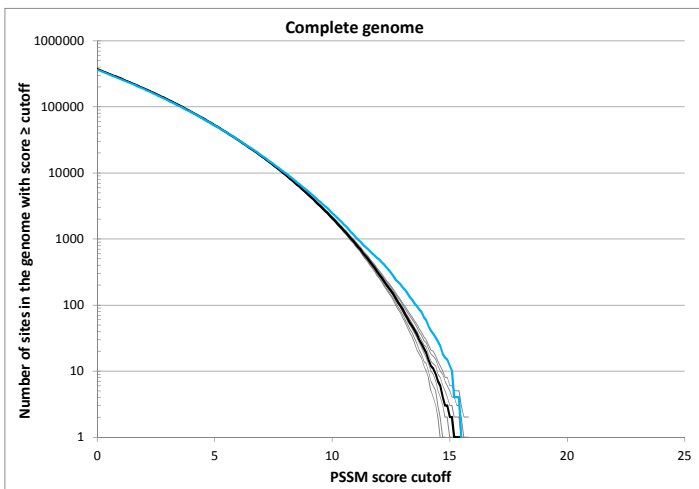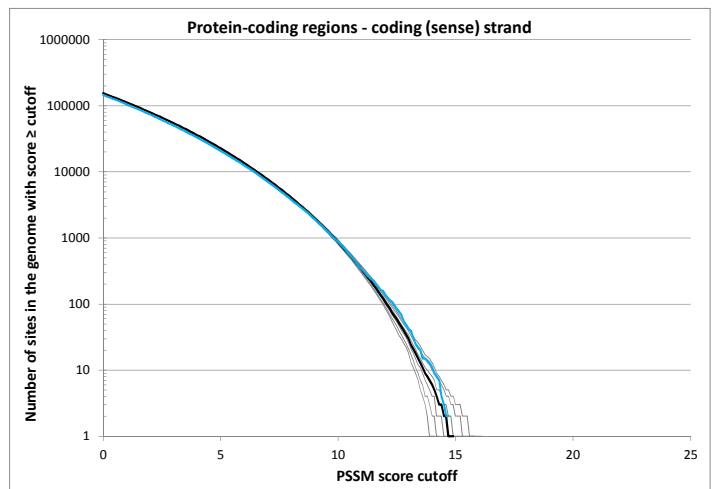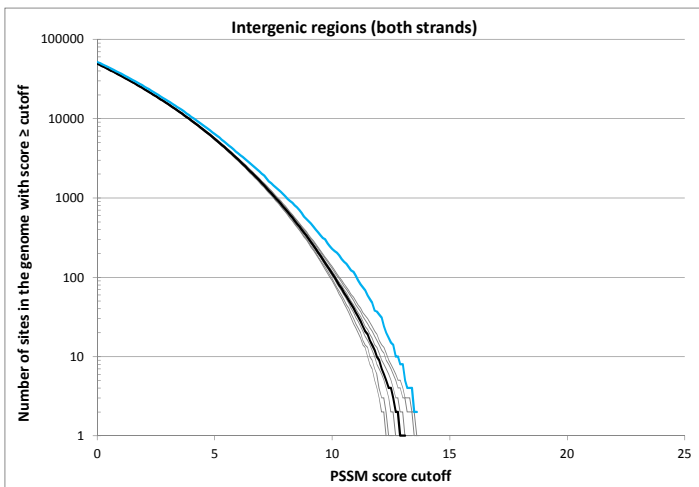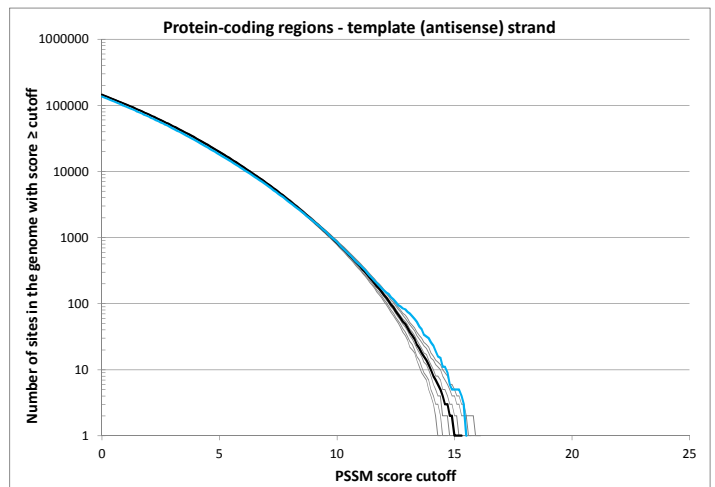

# LexA (*E. coli*)

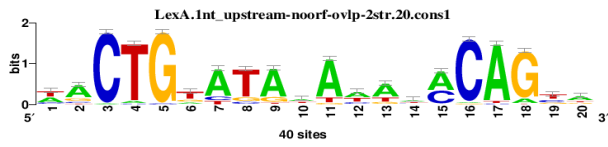

Motif length: 20  
Motif information content: 17.93 bits  
Max possible PSSM score: 27.92  
Motif GC content: 36.12 %  
Genome GC content: 50.79 %

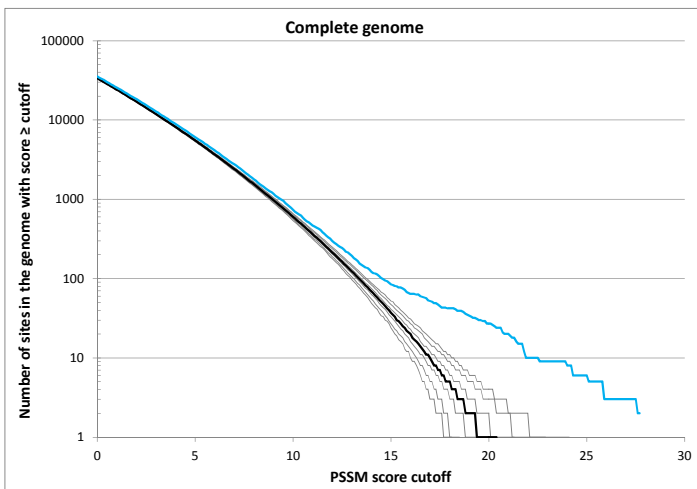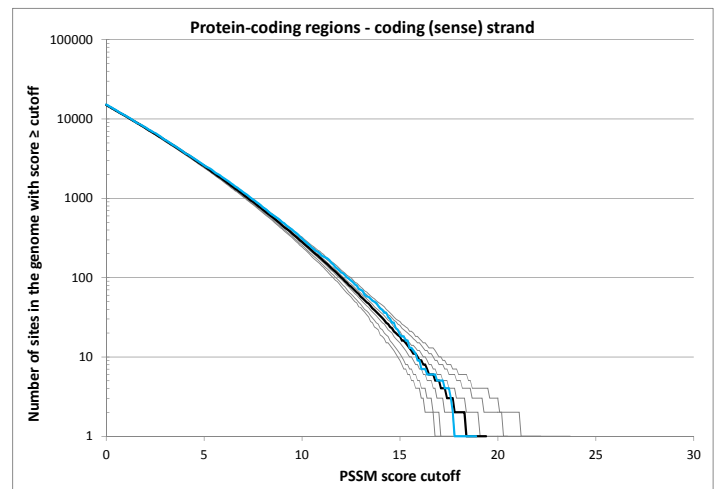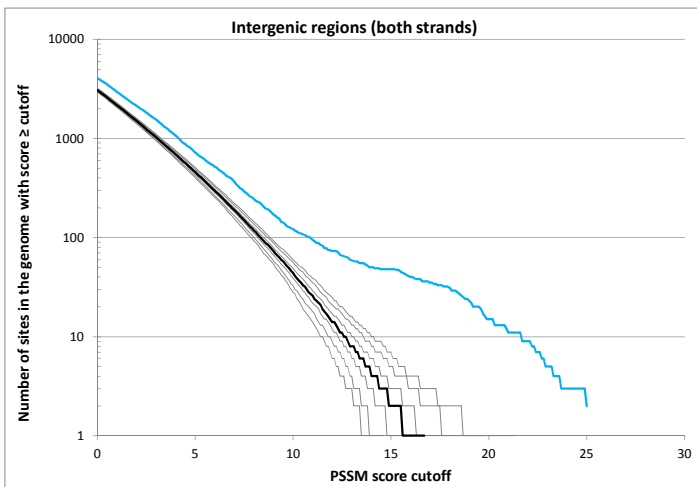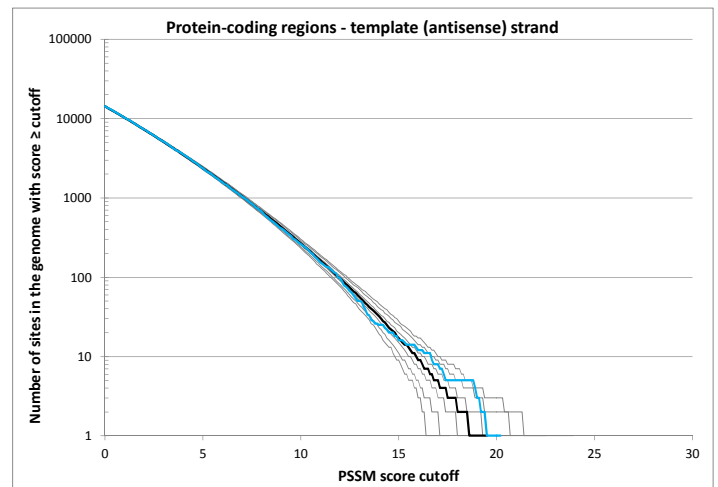



# LexA (*C. difficile*)

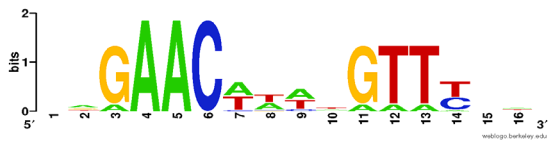

Motif length: 16  
Motif information content: 15.44 bits  
Max possible PSSM score: 18.31  
Motif GC content: 31.62 %  
Genome GC content: 28.81 %

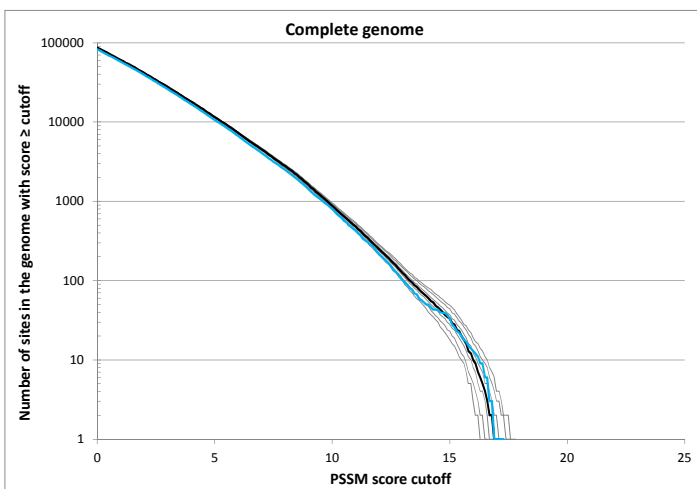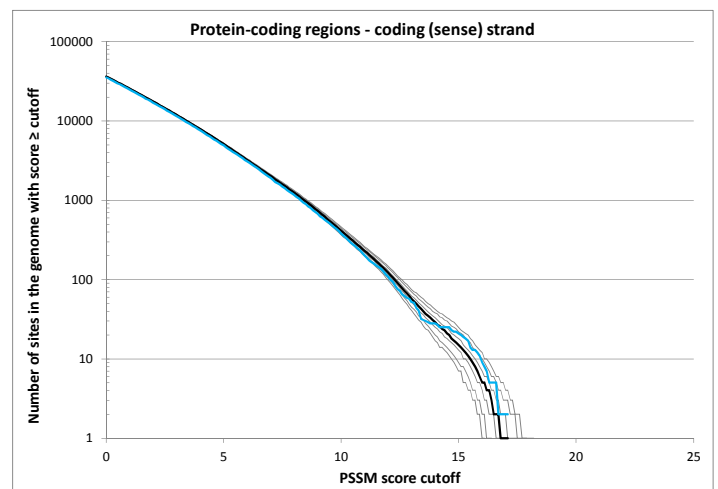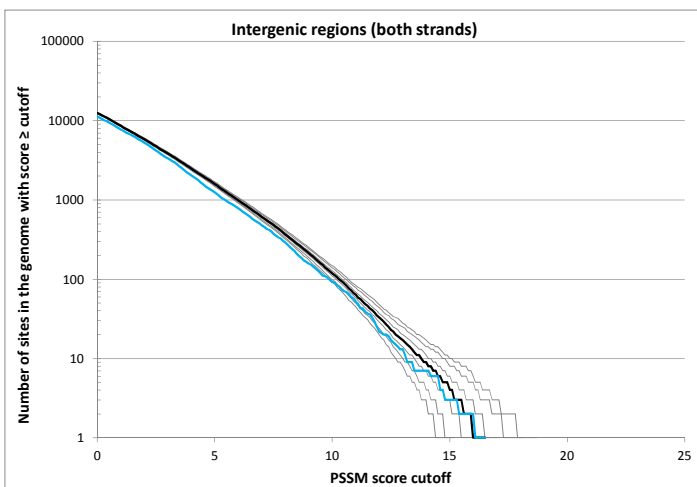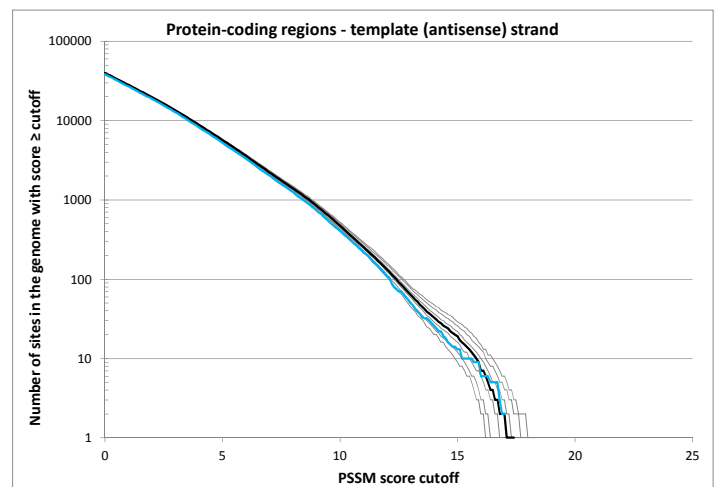

# LexA (*M. tuberculosis*)

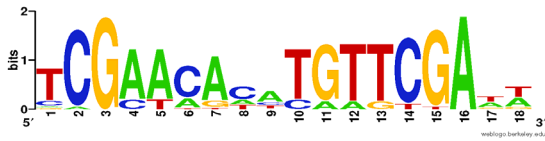

Motif length: 18  
Motif information content: 22.54 bits  
Max possible PSSM score: 31.87  
Motif GC content: 40.58 %  
Genome GC content: 65.61 %

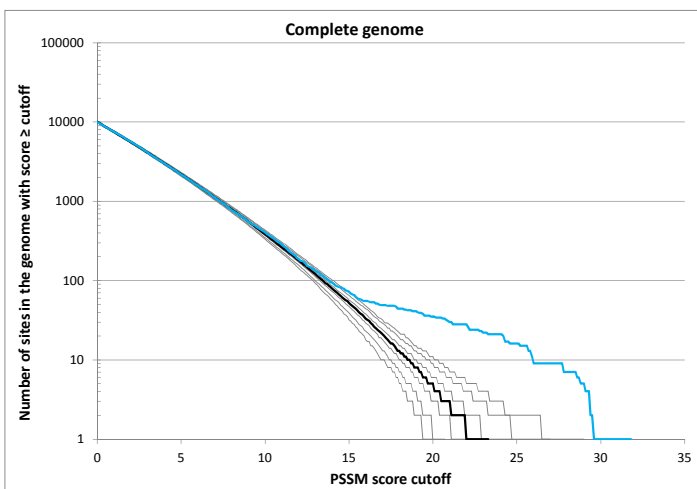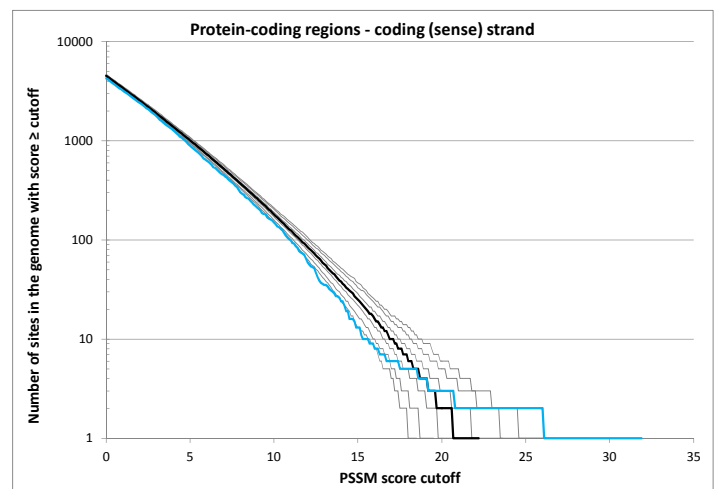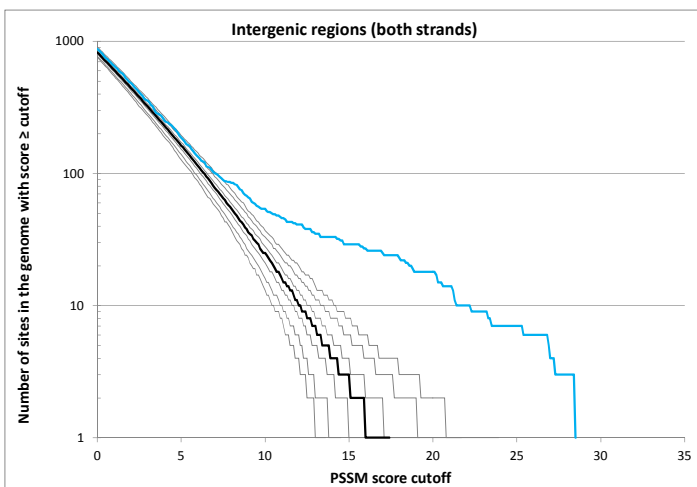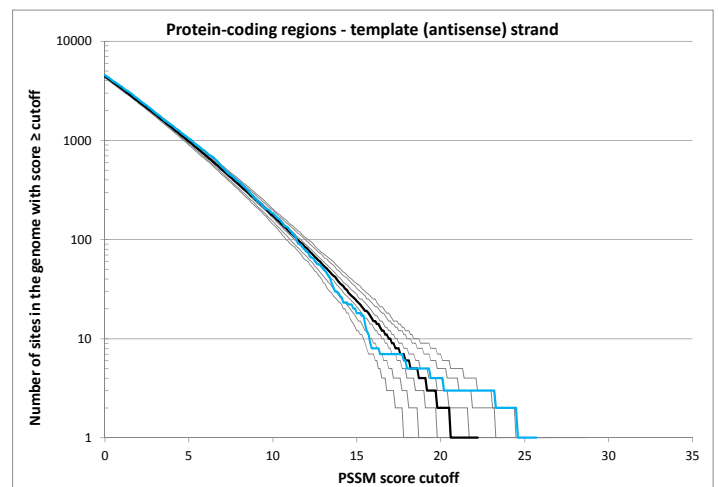

# Lrp (*E. coli*)

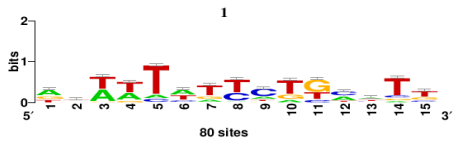

Motif length: 15  
Motif information content: 7.11 bits  
Max possible PSSM score: 15.96  
Motif GC content: 31.75 %  
Genome GC content: 50.79 %

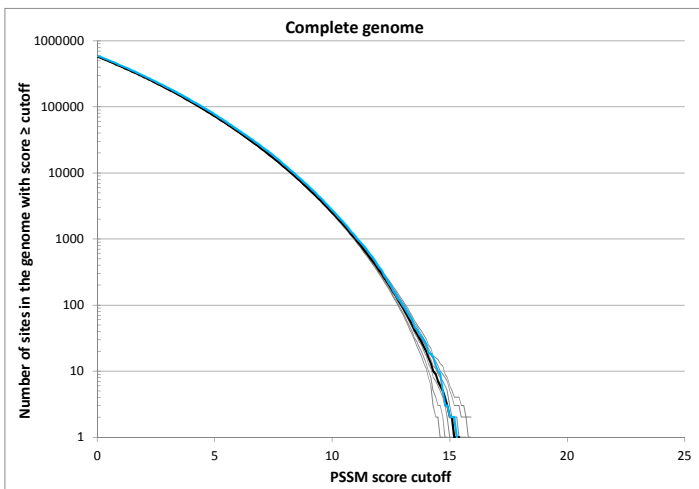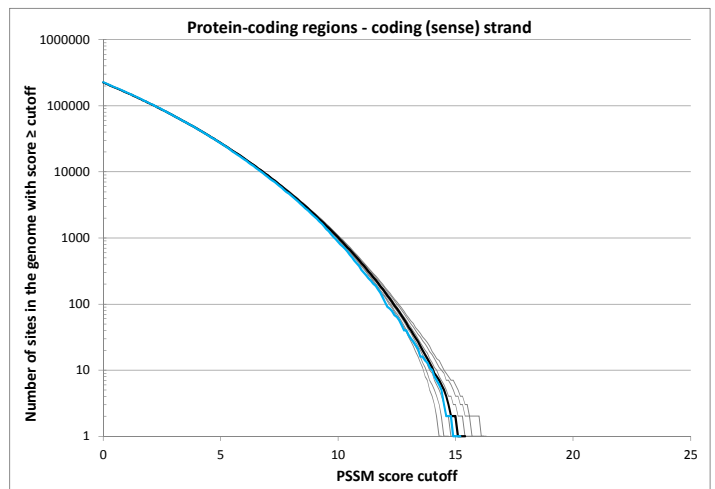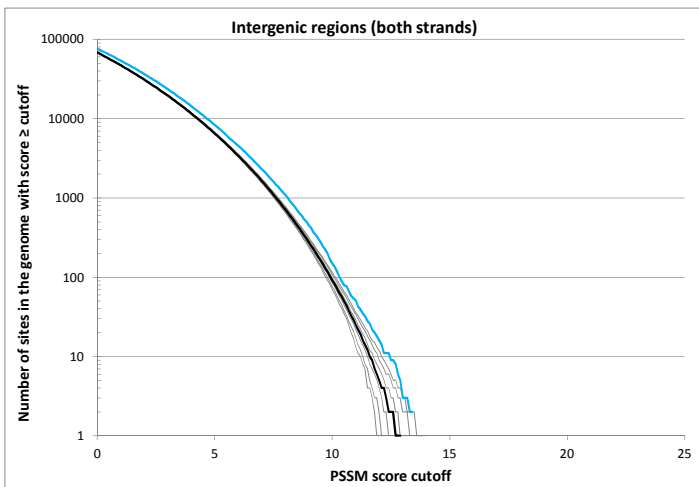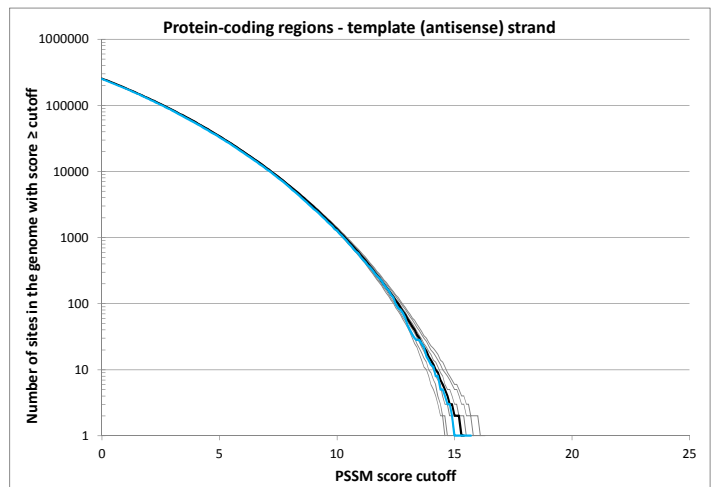

# MaIT (*E. coli*)

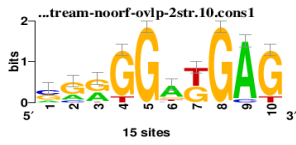

Motif length: 10  
Motif information content: 11.96 bits  
Max possible PSSM score: 14.37  
Motif GC content: 65.33 %  
Genome GC content: 50.79 %

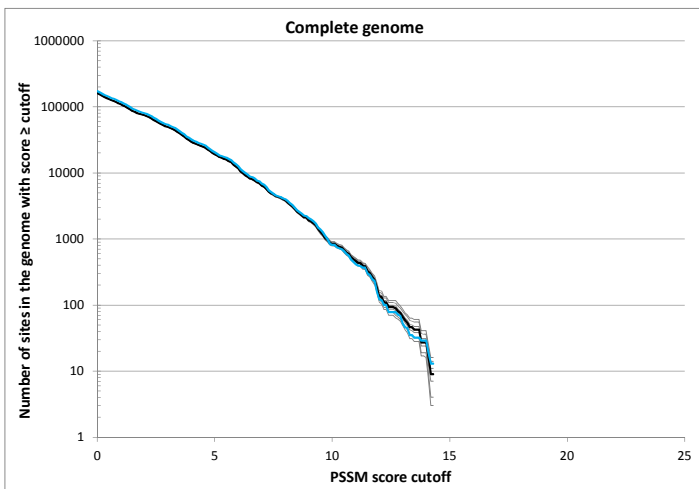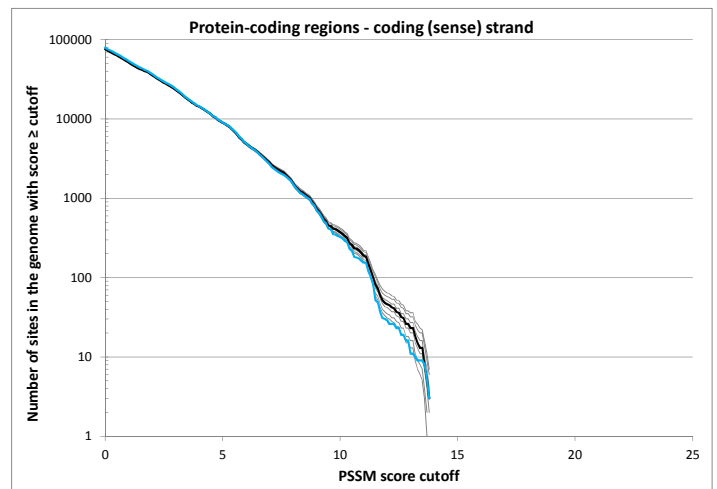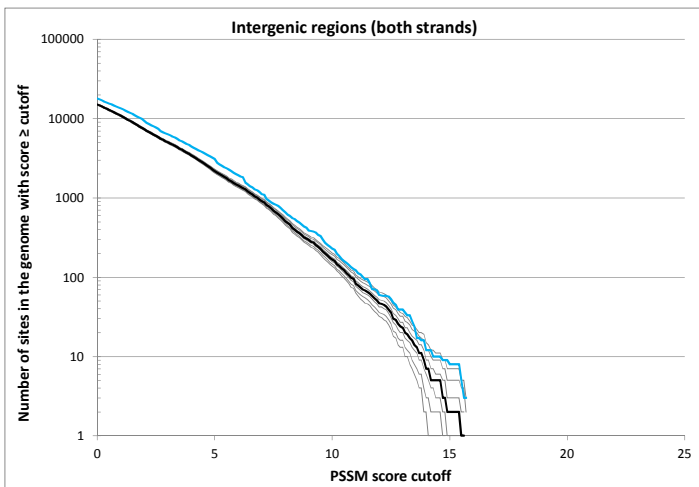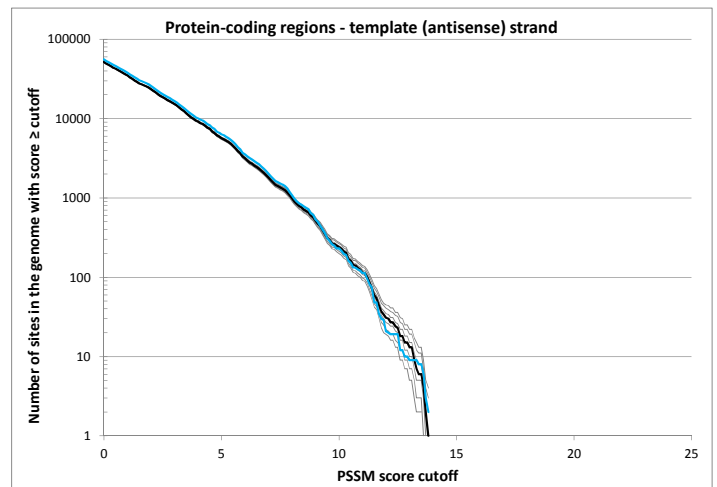

# MarA (*E. coli*)

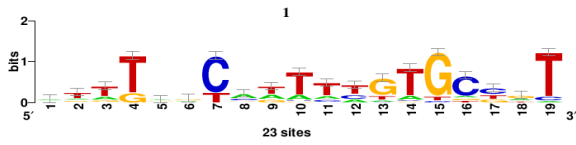

Motif length: 19  
Motif information content: 12.43 bits  
Max possible PSSM score: 23.20  
Motif GC content: 40.50 %  
Genome GC content: 50.79 %

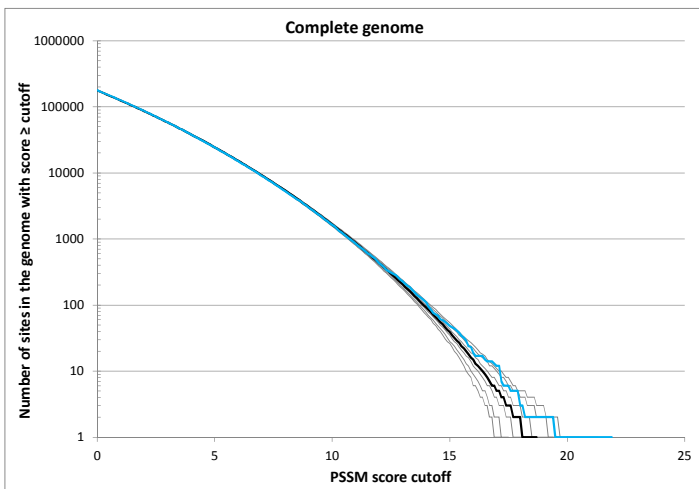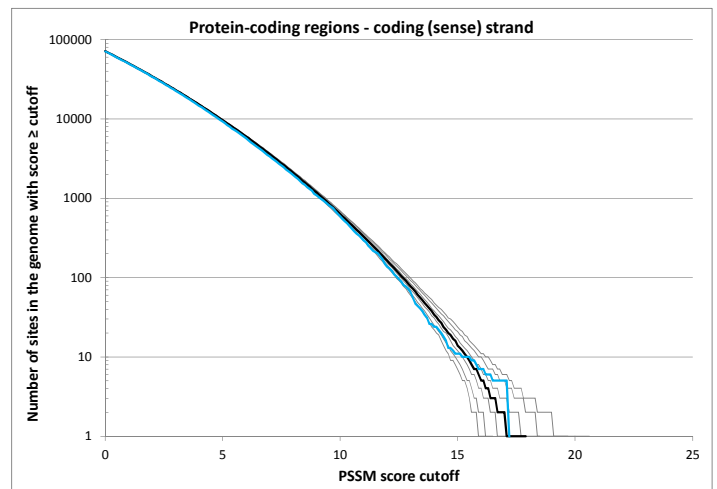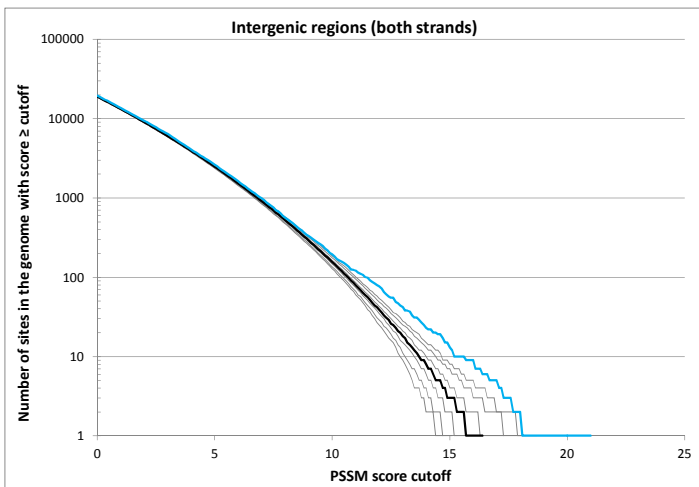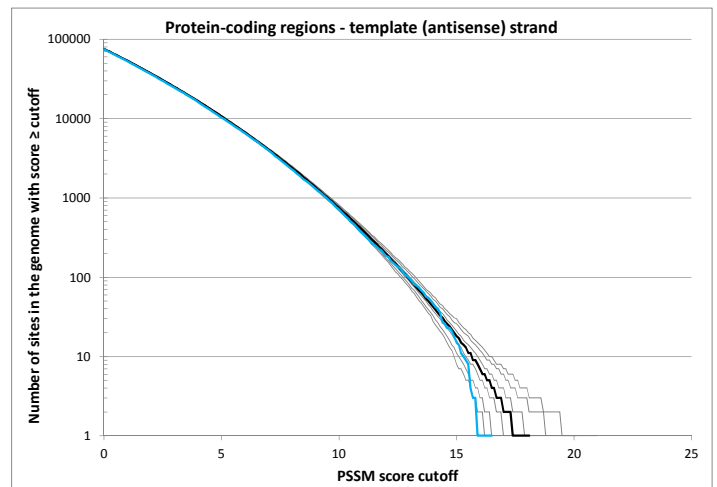

# MetJ (*E. coli*)

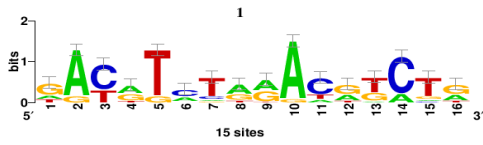

Motif length: 16  
Motif information content: 14.11 bits  
Max possible PSSM score: 20.96  
Motif GC content: 41.67 %  
Genome GC content: 50.79 %

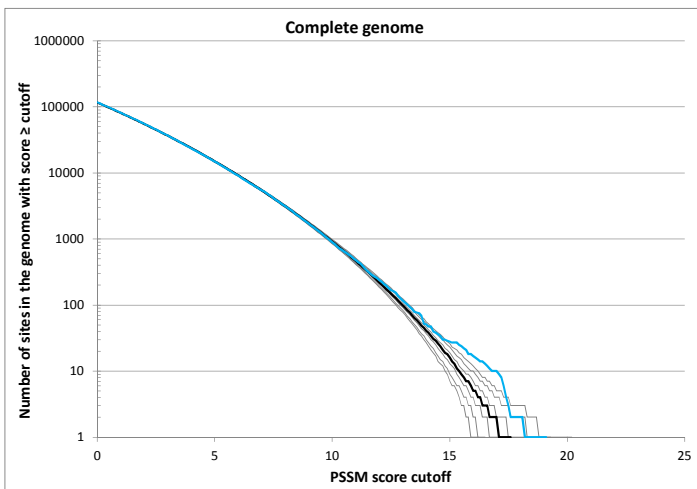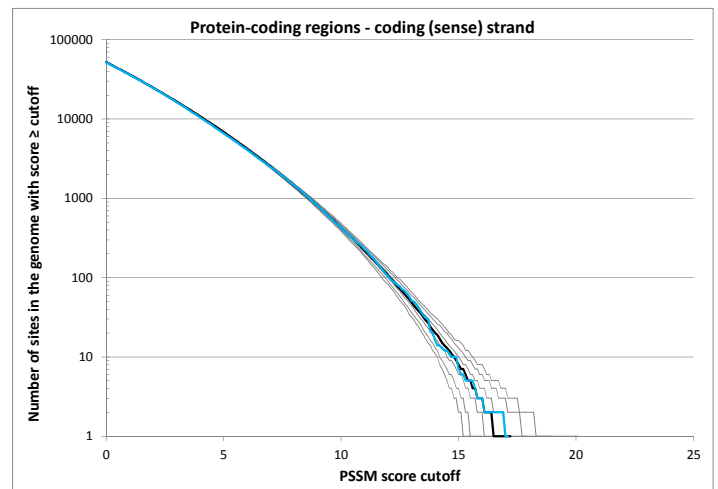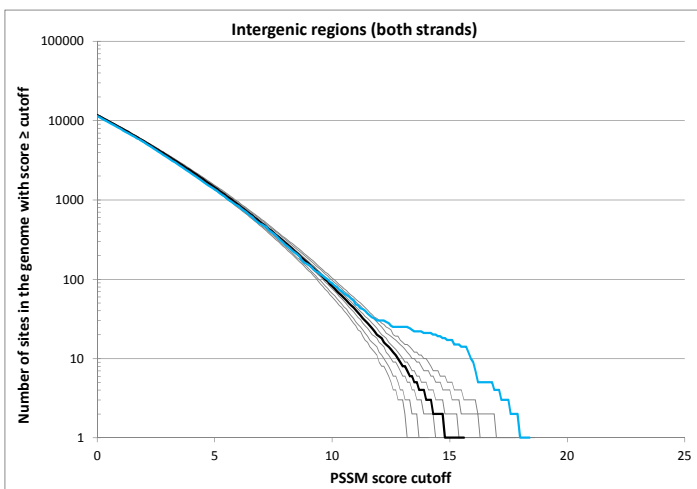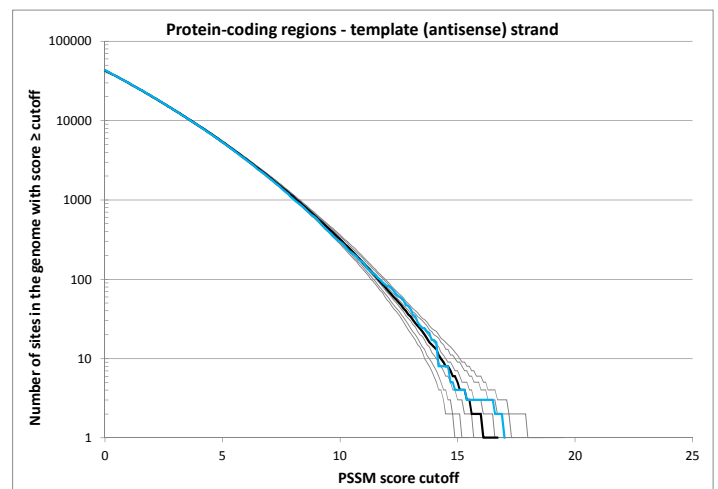

# Nac (*E. coli*)

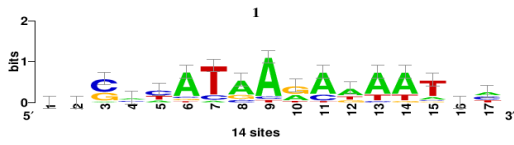

Motif length: 17  
Motif information content: 10.56 bits  
Max possible PSSM score: 18.63  
Motif GC content: 31.51 %  
Genome GC content: 50.79 %

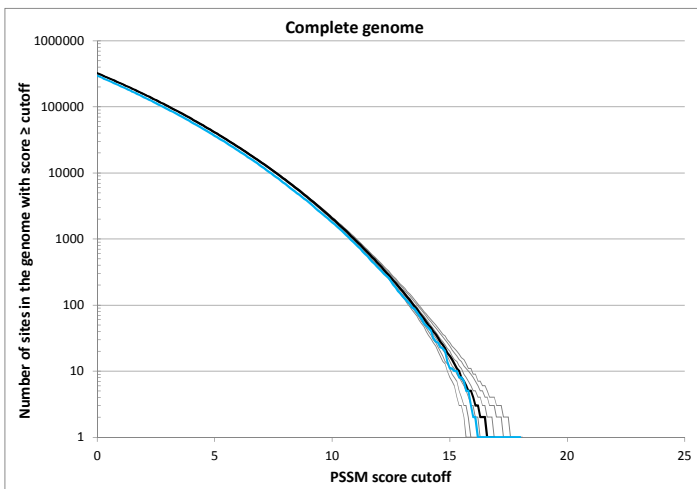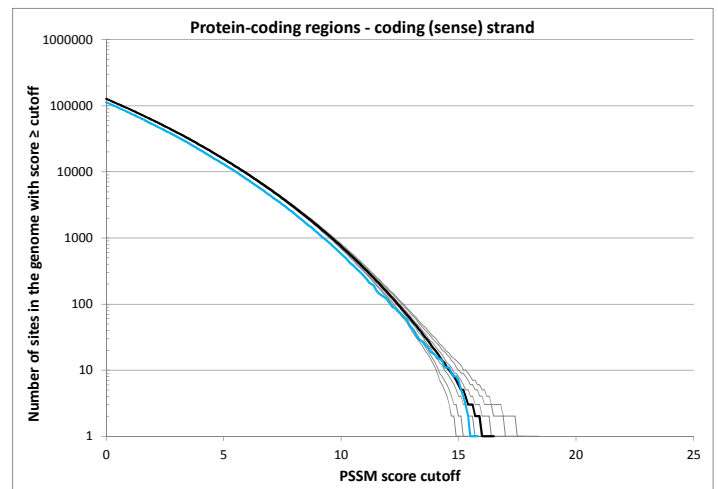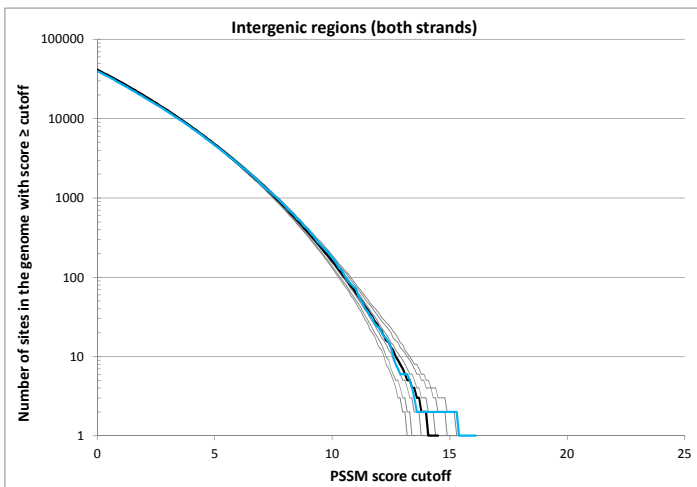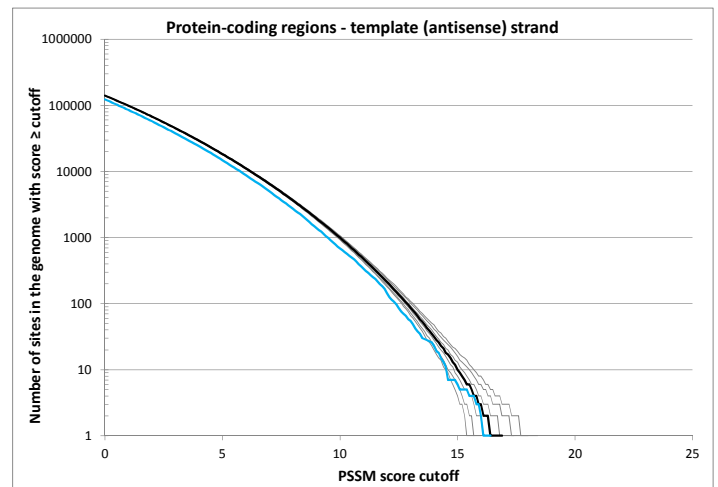

# NagC (*E. coli*)

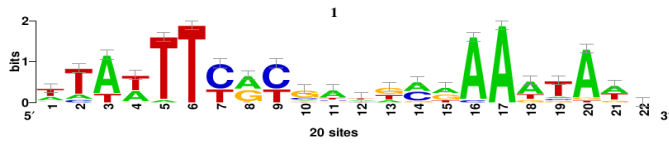

Motif length: 22  
Motif information content: 19.86 bits  
Max possible PSSM score: 28.05  
Motif GC content: 27.50 %  
Genome GC content: 50.79 %

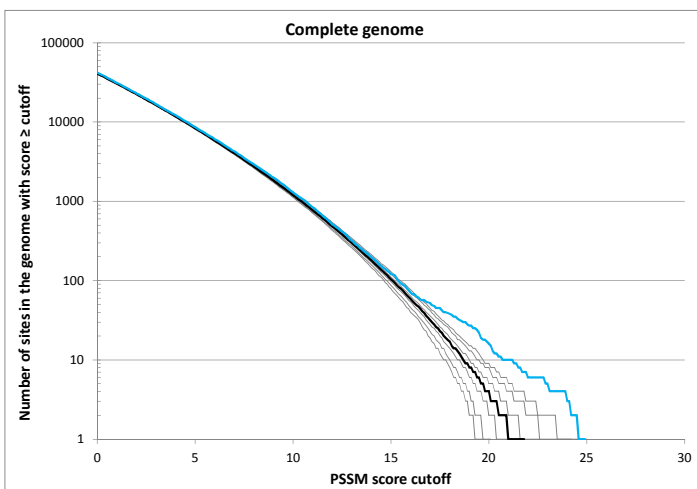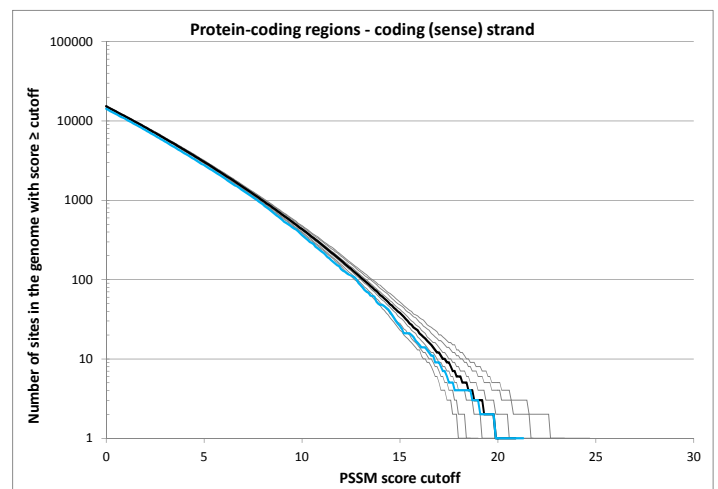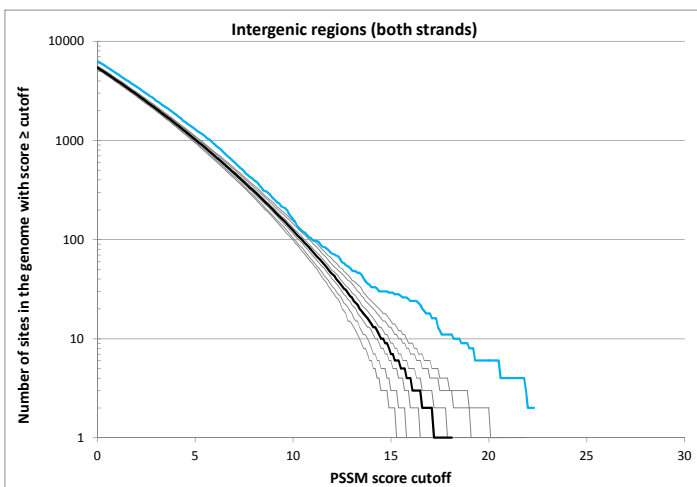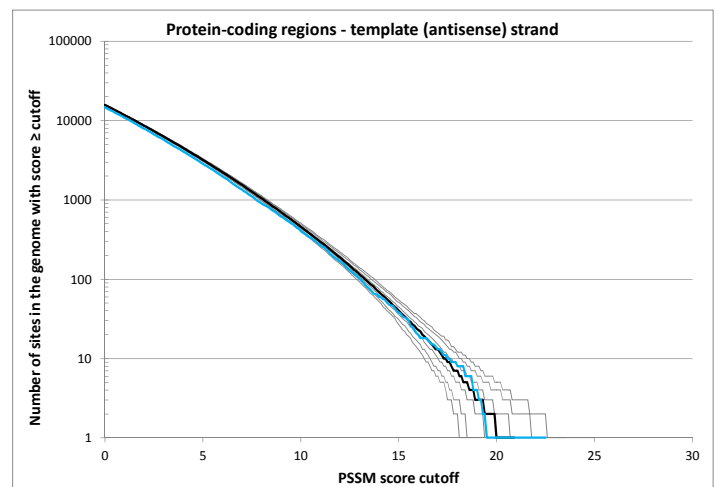





# NsrR (*E. coli*)

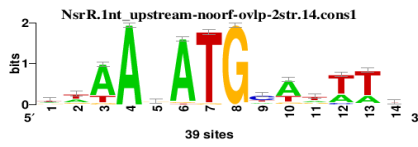

Motif length: 14  
Motif information content: 12.18 bits  
Max possible PSSM score: 18.64  
Motif GC content: 26.74 %  
Genome GC content: 50.79 %

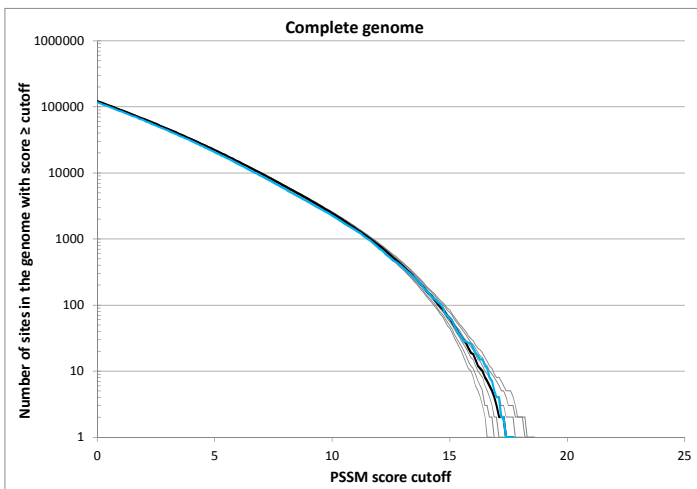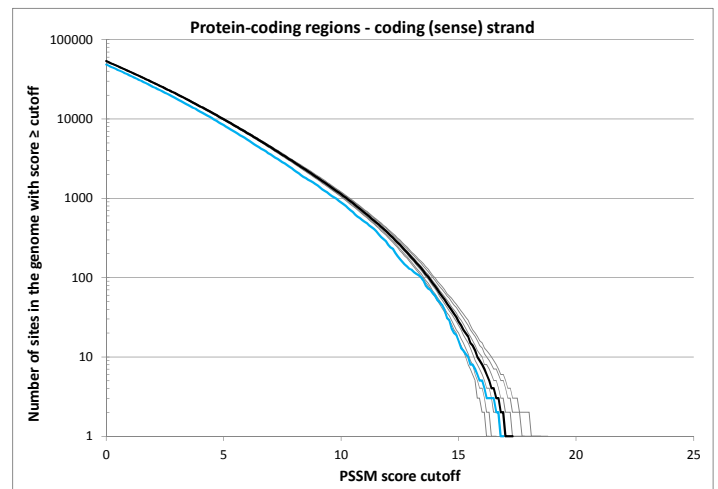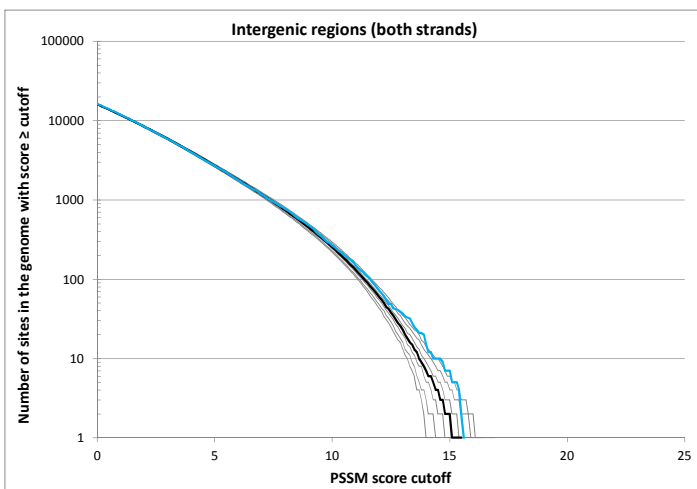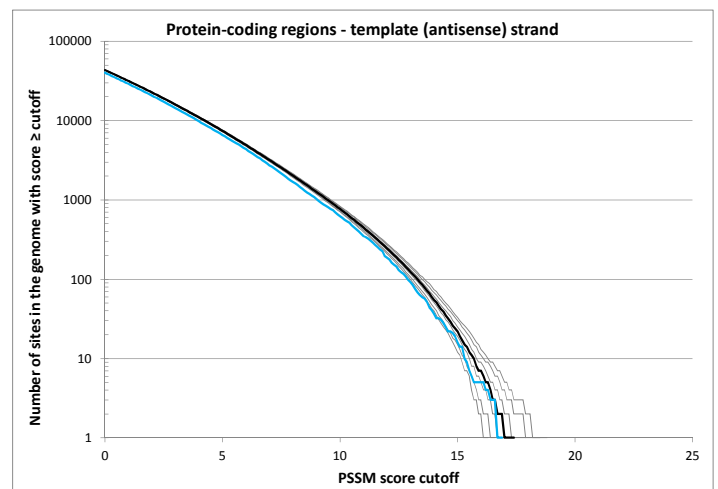

# NtrC (*E. coli*)

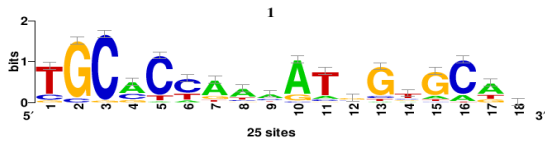

Motif length: 18  
 Motif information content: 14.37 bits  
 Max possible PSSM score: 24.98  
 Motif GC content: 51.33 %  
 Genome GC content: 50.79 %

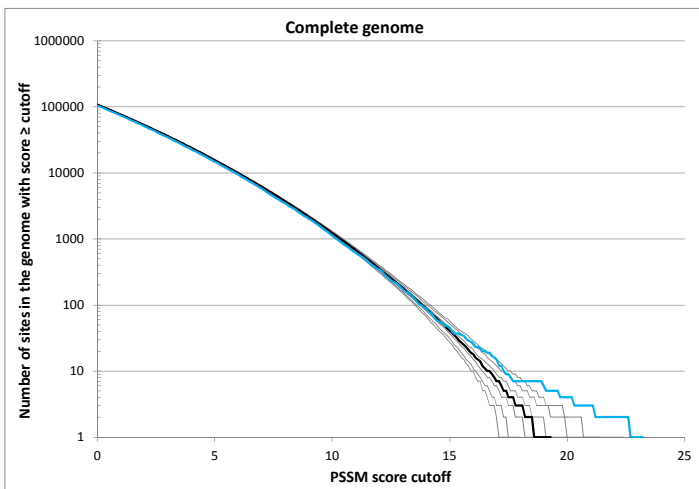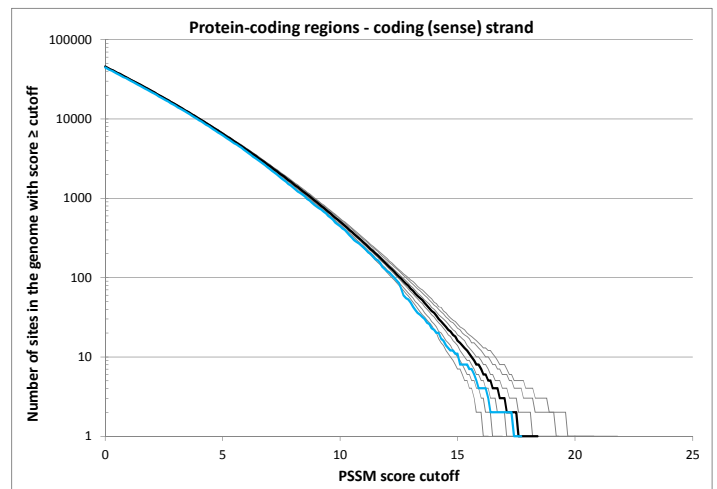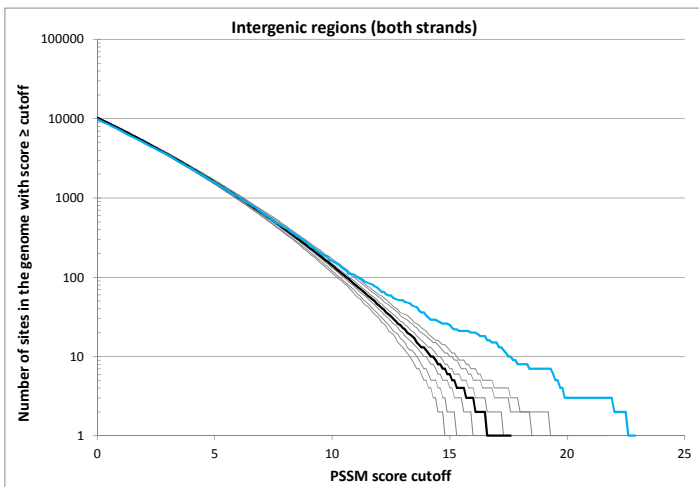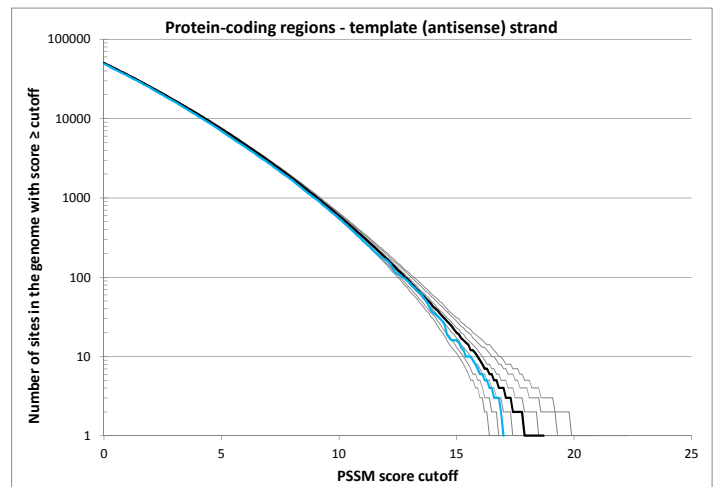

# OmpR (*E. coli*)

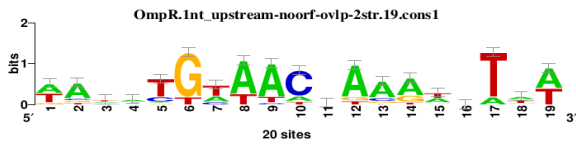

Motif length: 19  
 Motif information content: 13.53 bits  
 Max possible PSSM score: 22.72  
 Motif GC content: 26.05 %  
 Genome GC content: 50.79 %

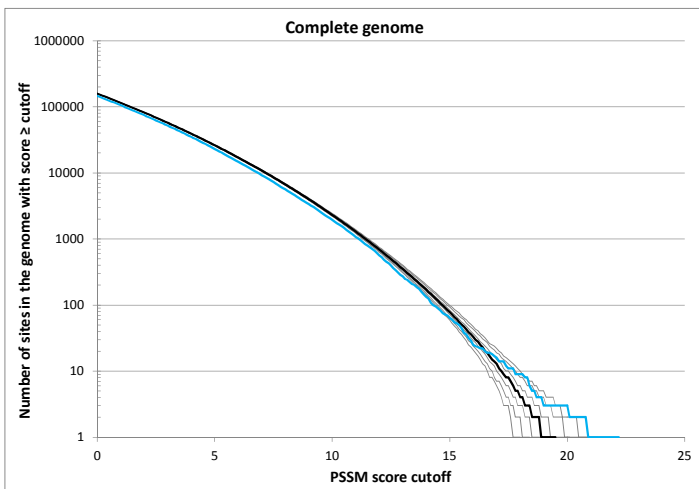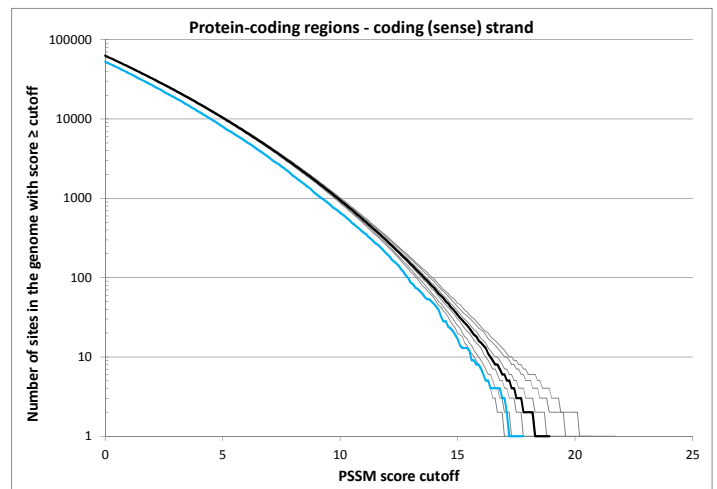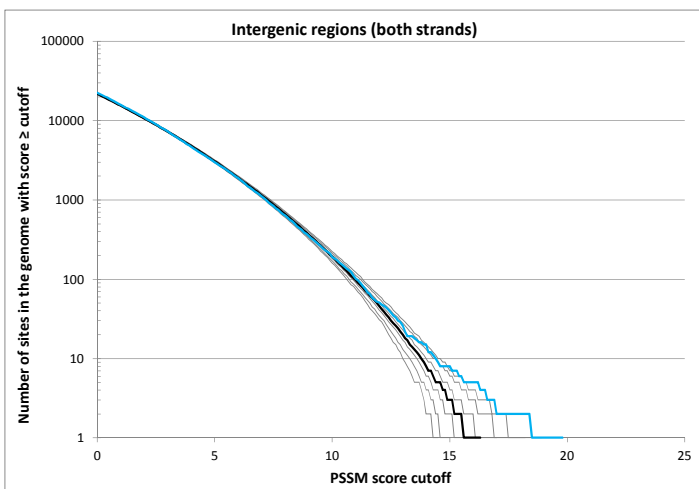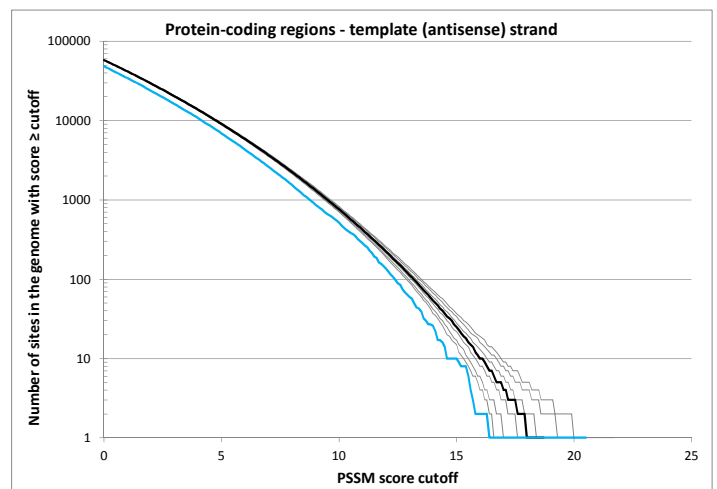

# OxyR (*E. coli*)

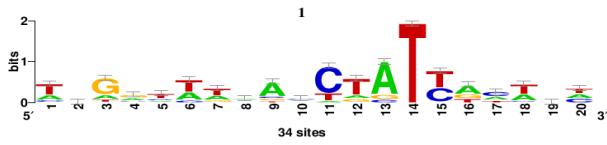

Motif length: 20  
Motif information content: 11.16 bits  
Max possible PSSM score: 21.28  
Motif GC content: 32.94 %  
Genome GC content: 50.79 %

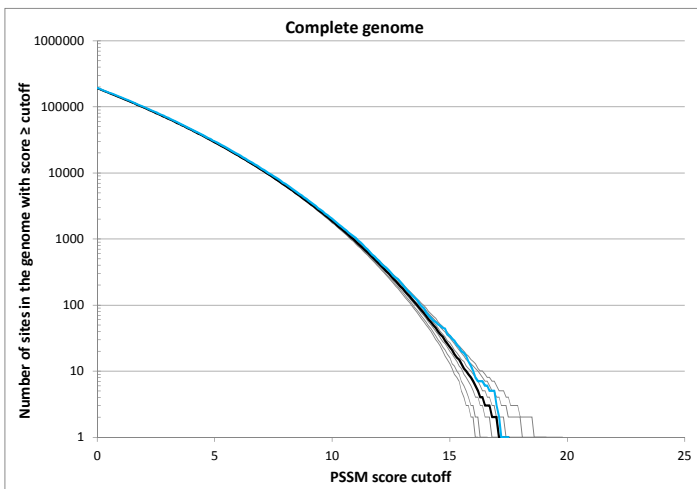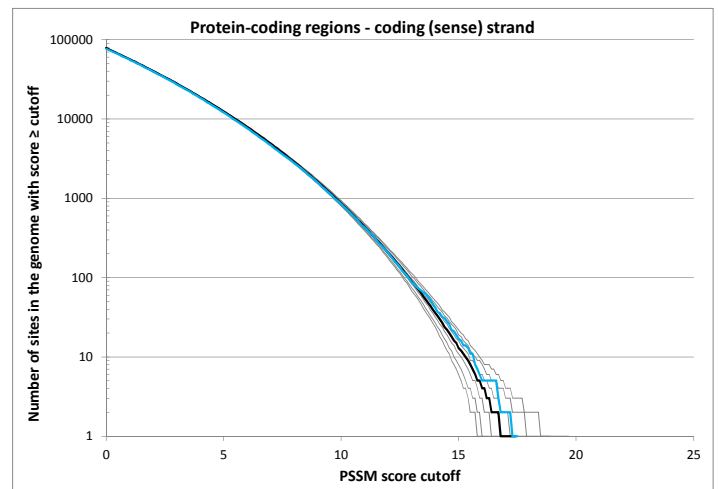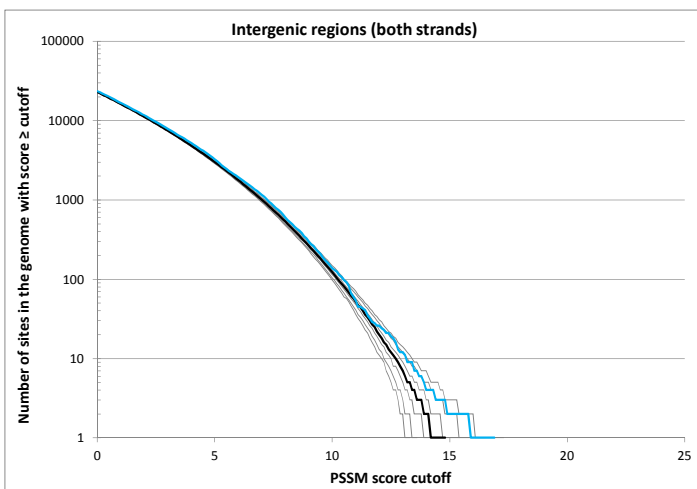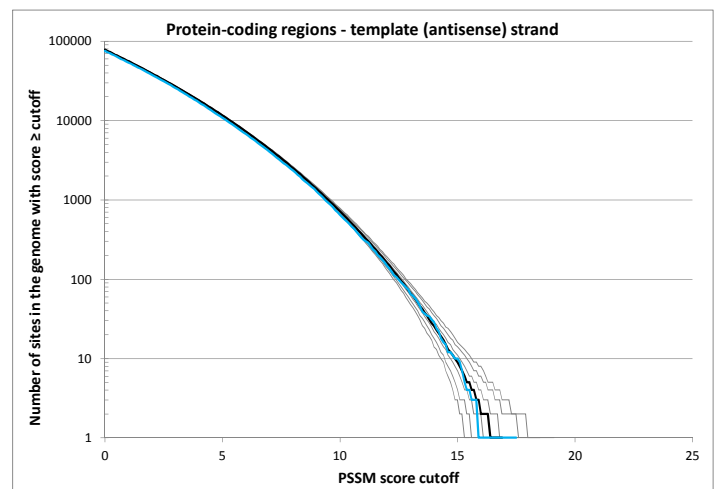



# PhoP (*E. coli*)

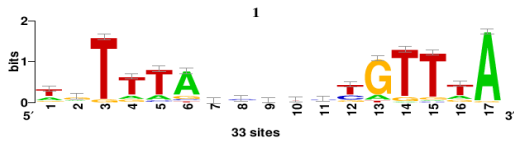

Motif length: 17  
Motif information content: 12.03 bits  
Max possible PSSM score: 21.55  
Motif GC content: 29.95 %  
Genome GC content: 50.79 %

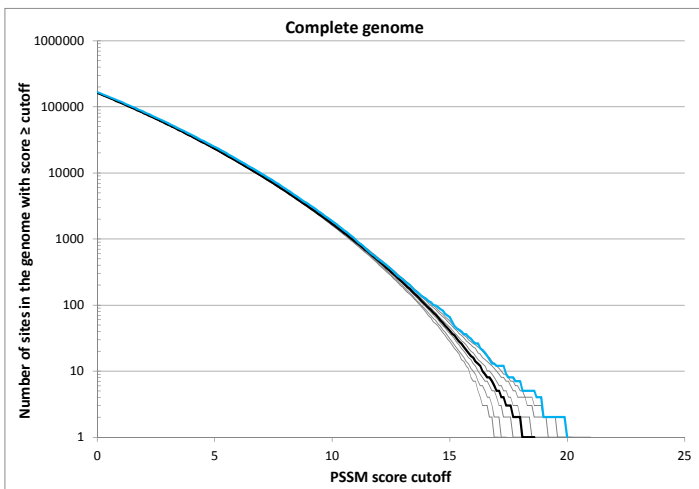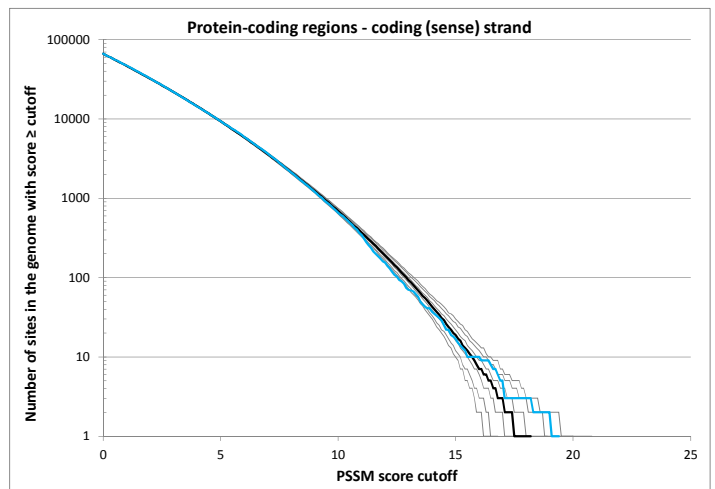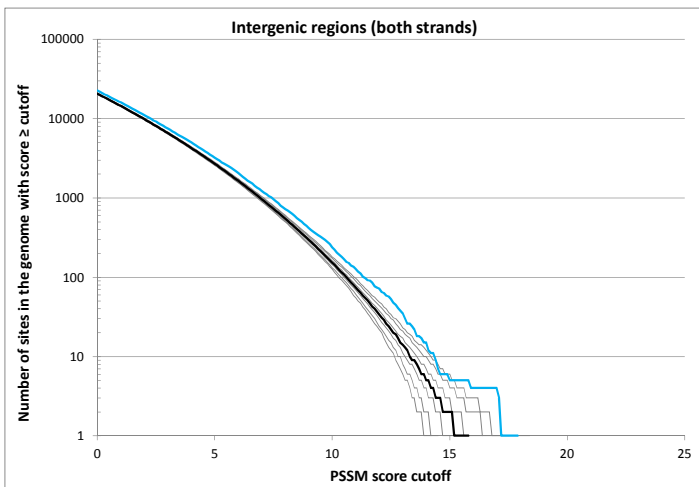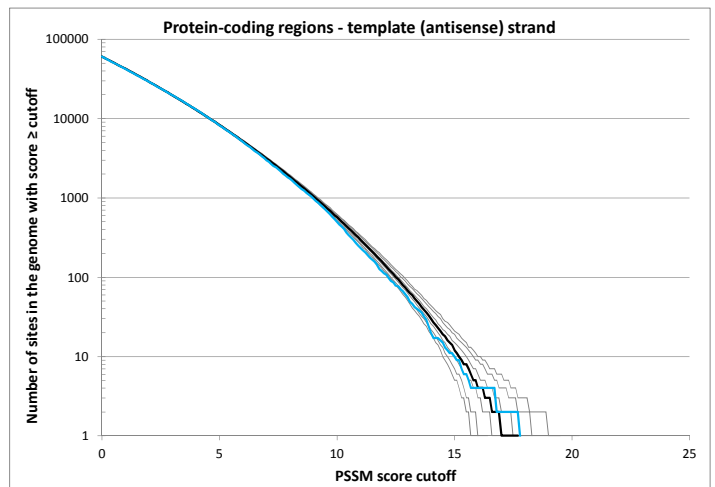

# PurR (*E. coli*)

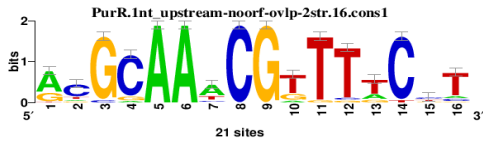

Motif length: 16  
Motif information content: 20.45 bits  
Max possible PSSM score: 25.83  
Motif GC content: 46.13 %  
Genome GC content: 50.79 %

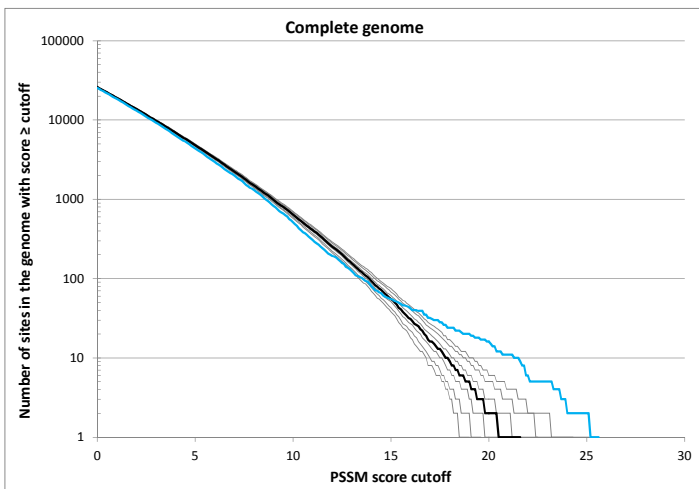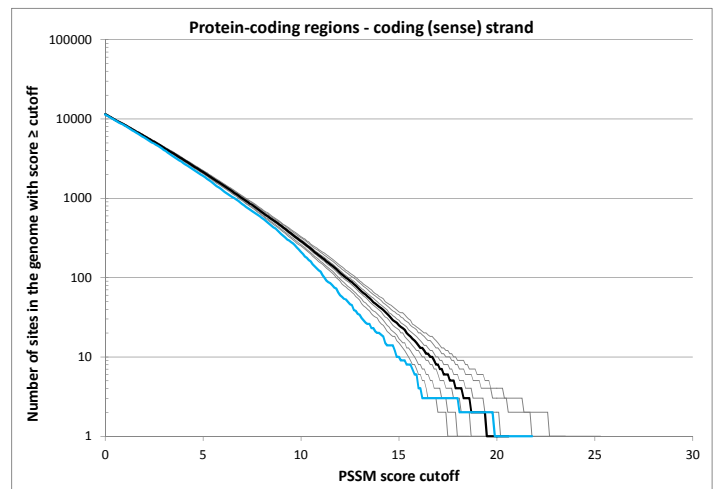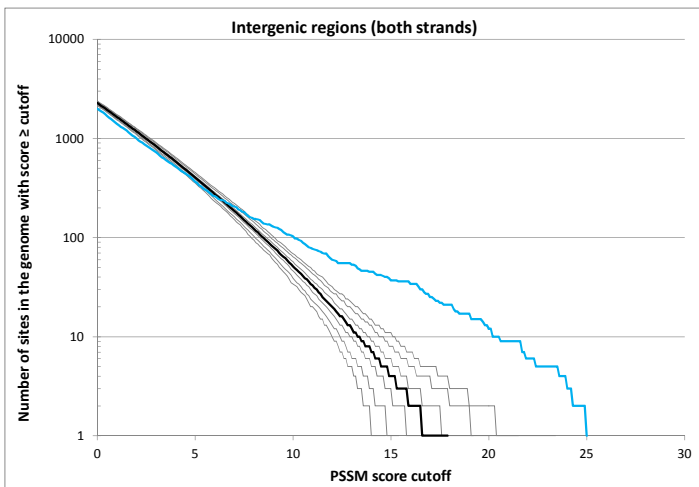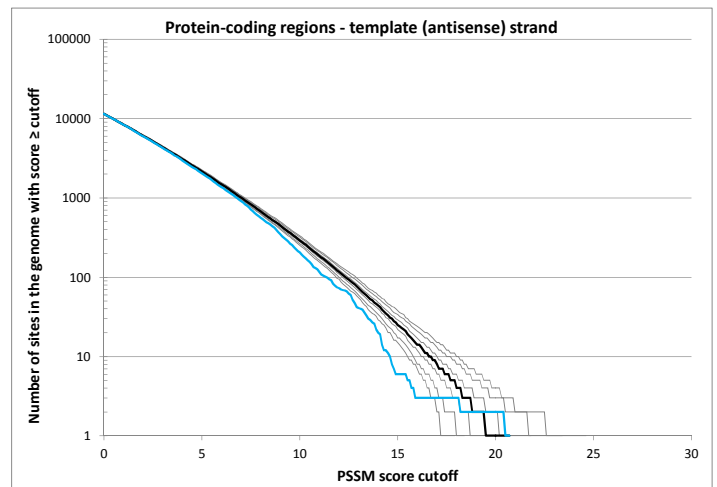







# TyrR (*E. coli*)

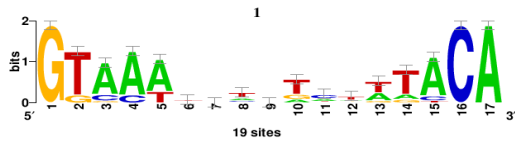

Motif length: 17  
Motif information content: 15.77 bits  
Max possible PSSM score: 22.87  
Motif GC content: 30.65 %  
Genome GC content: 50.79 %

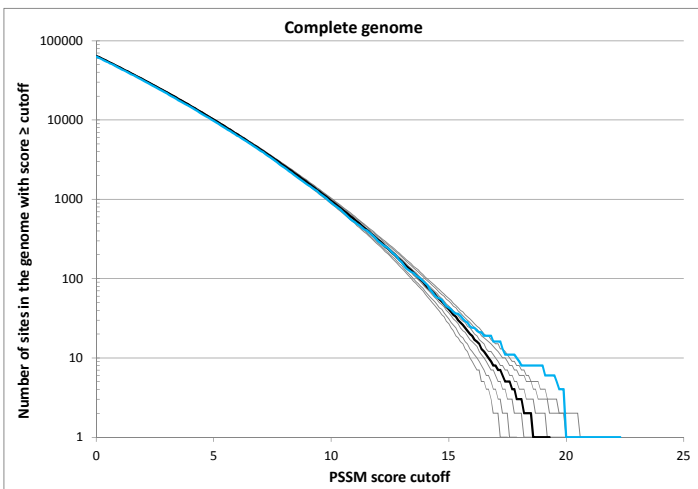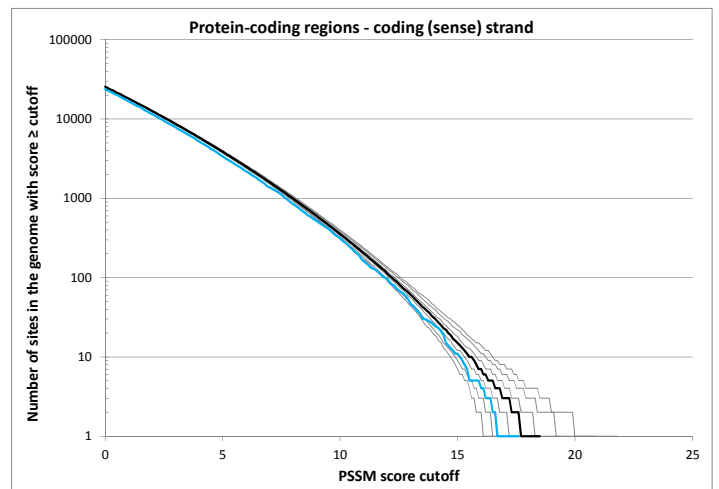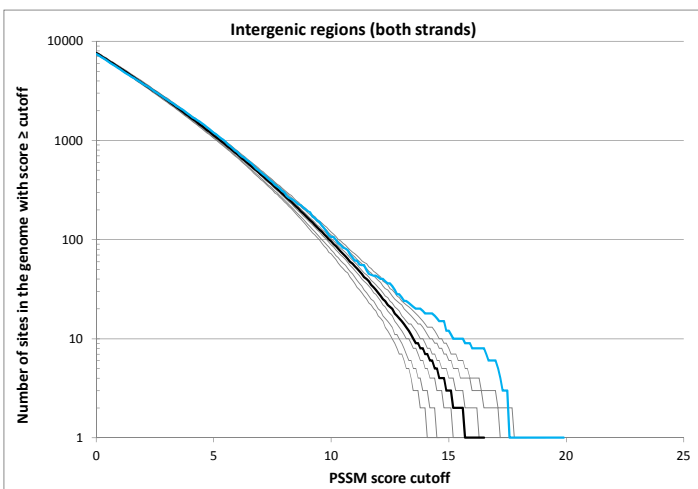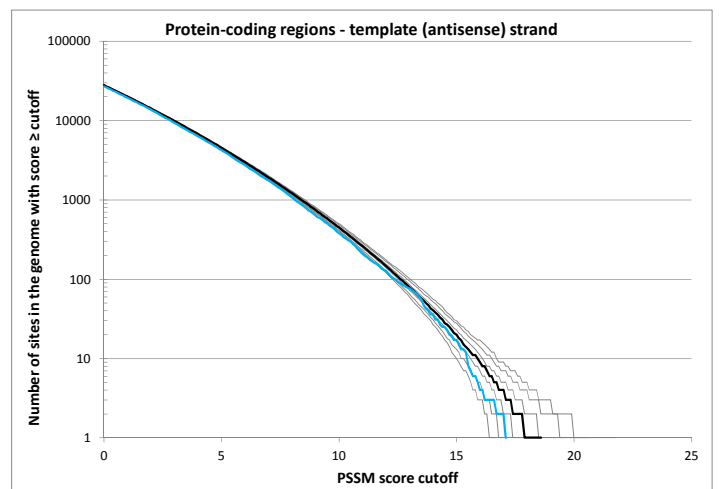

# $\sigma^{54}$ (*S. enterica* subsp. Typhimurium)

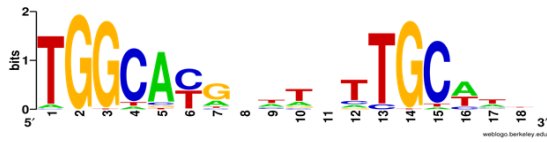

Motif length: 18  
Motif information content: 16.88 bits  
Max possible PSSM score: 25.00  
Motif GC content: 46.12 %  
Genome GC content: 52.20 %

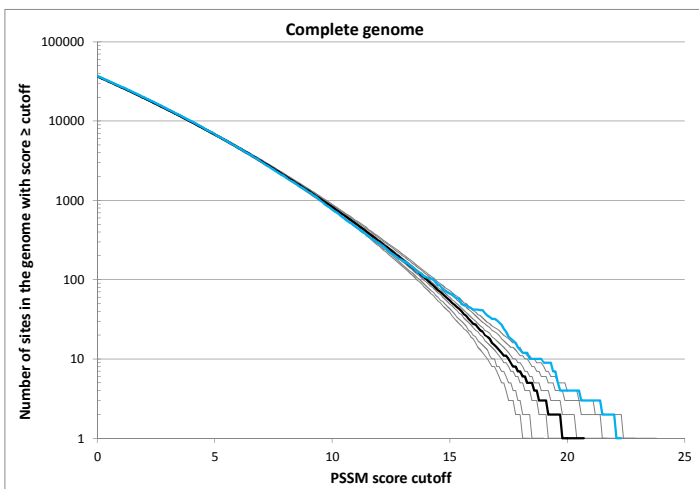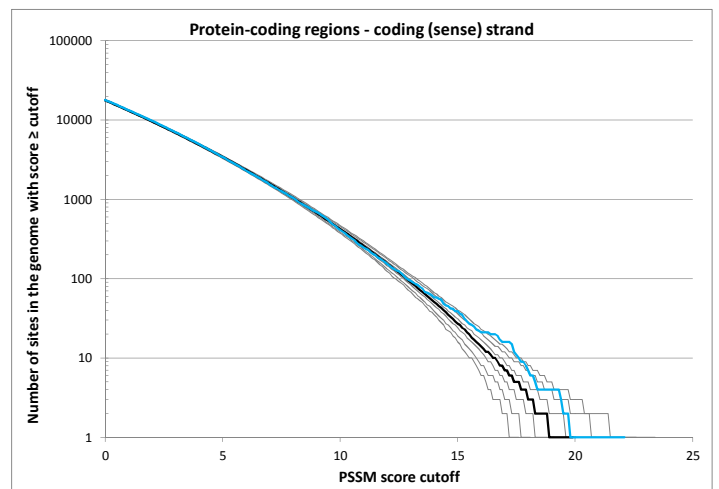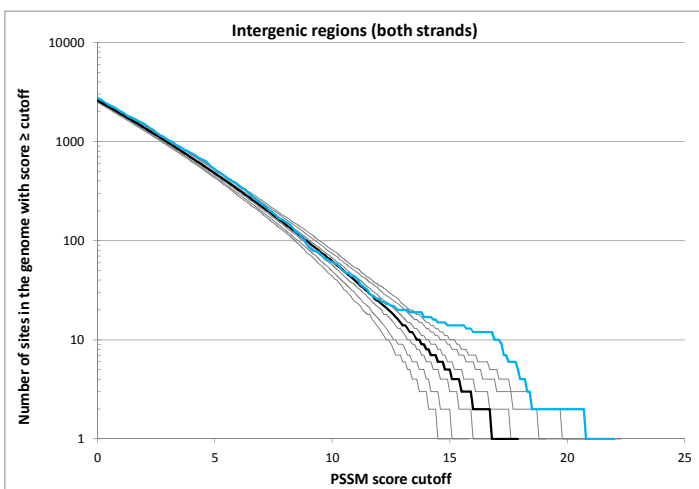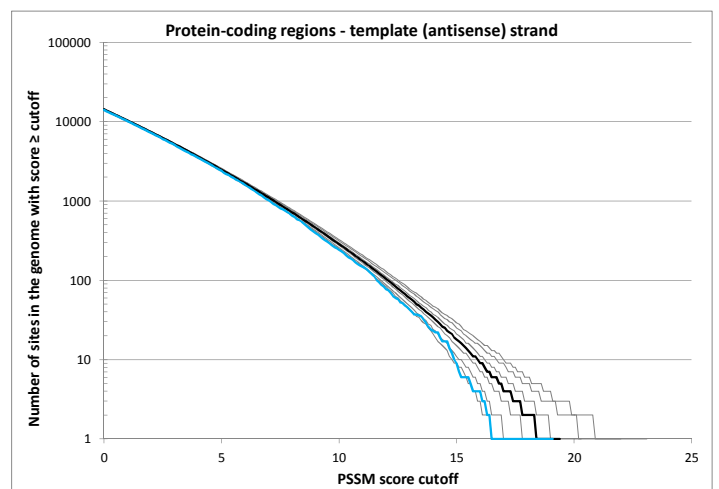

Supplement: 12862_2019_1381_MOESM1_ESM.pdf [file 12862_2019_1381_MOESM1_ESM.pdf]
