# Supplementary material for: In silico simulations of occurrence of transcription factor binding sites in bacterial genomes
Source: PubMed Central journal article supplement (PMC6397444; doi:10.1186/s12862-019-1381-8), 2019-03-01

# Test: *E. coli* LexA in *C. difficile* genome

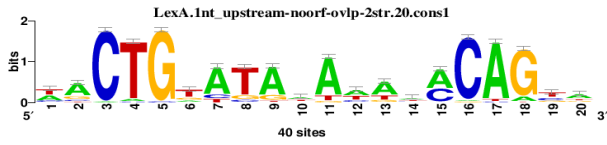

Motif length: 20  
Motif information content: 17.93 bits  
Max possible PSSM score: 24.65  
Motif GC content: 36.12 %  
Genome GC content: 28.81 %

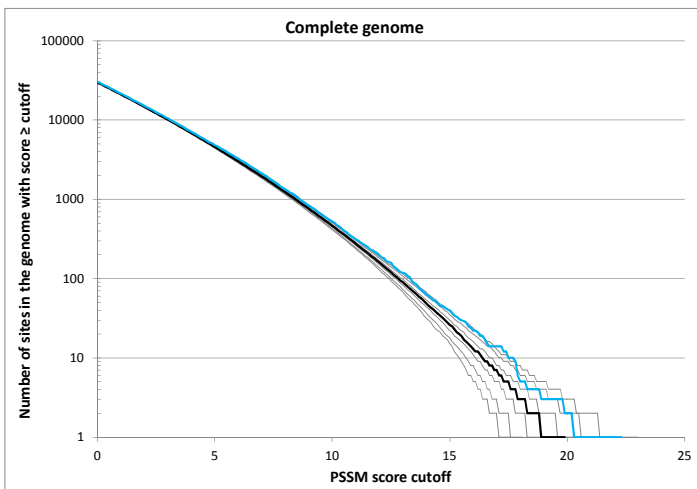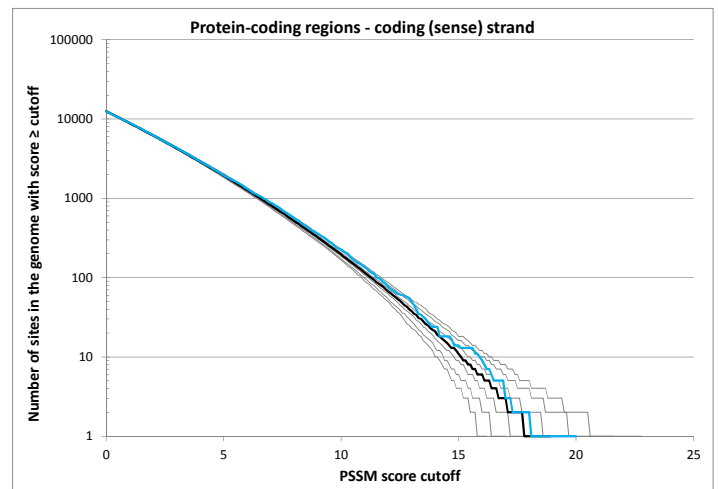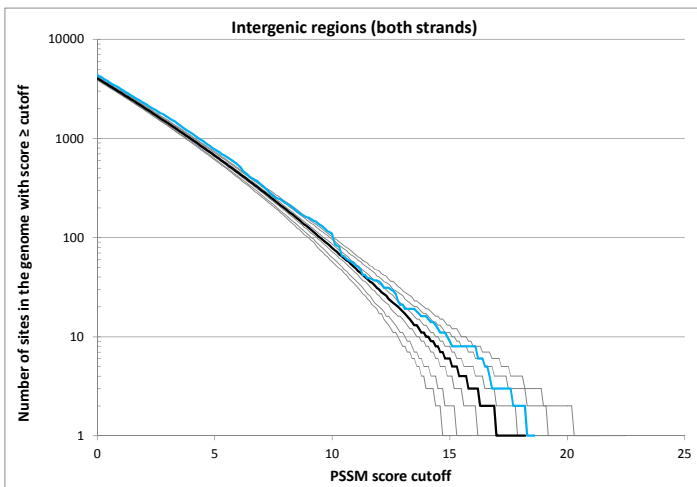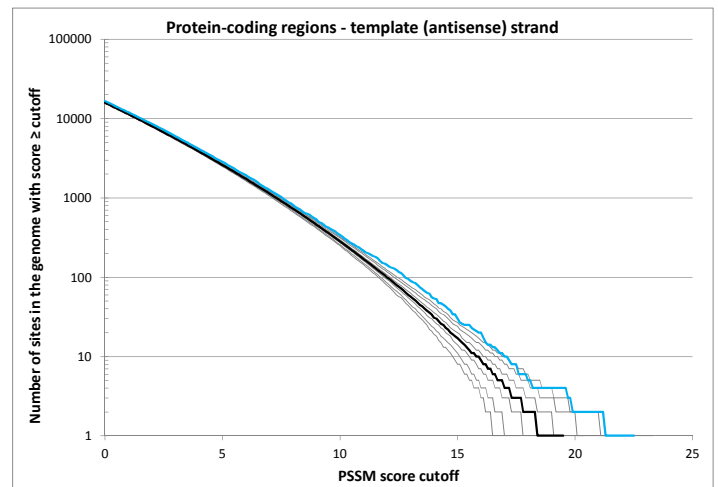

# Test: *E. coli* LexA in *M. tuberculosis* genome



Motif length: 20  
Motif information content: 17.93 bits  
Max possible PSSM score: 34.66  
Motif GC content: 36.12 %  
Genome GC content: 65.61 %

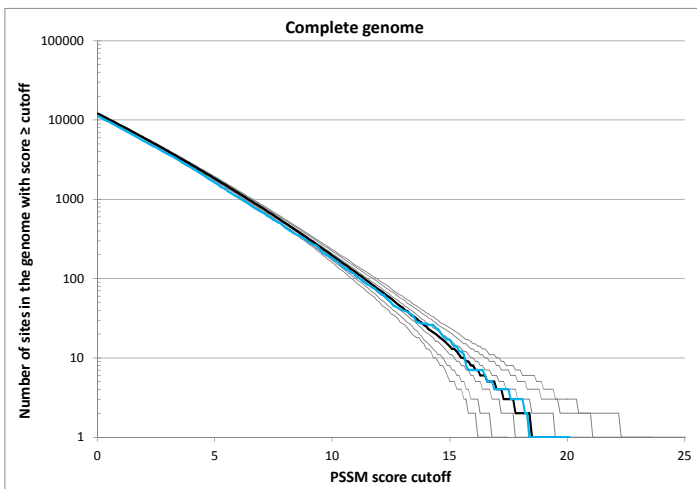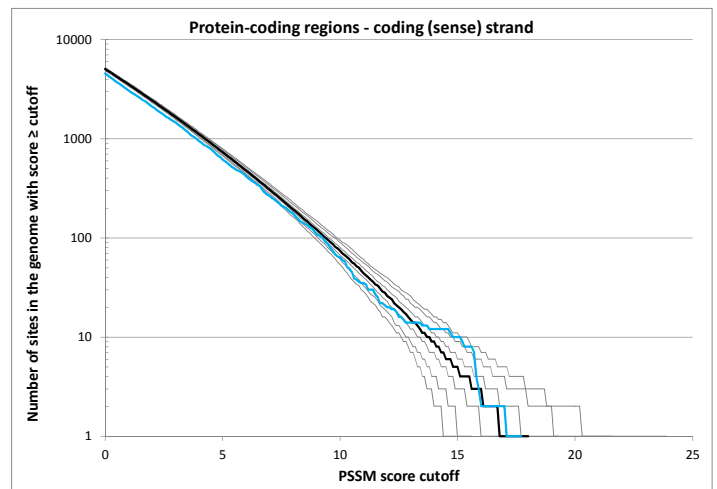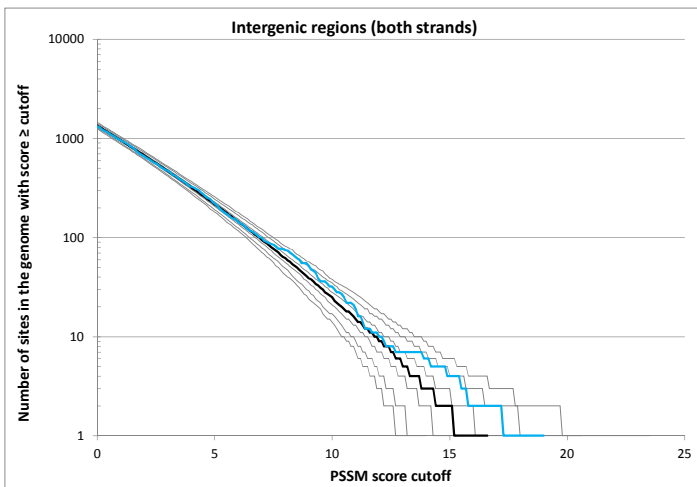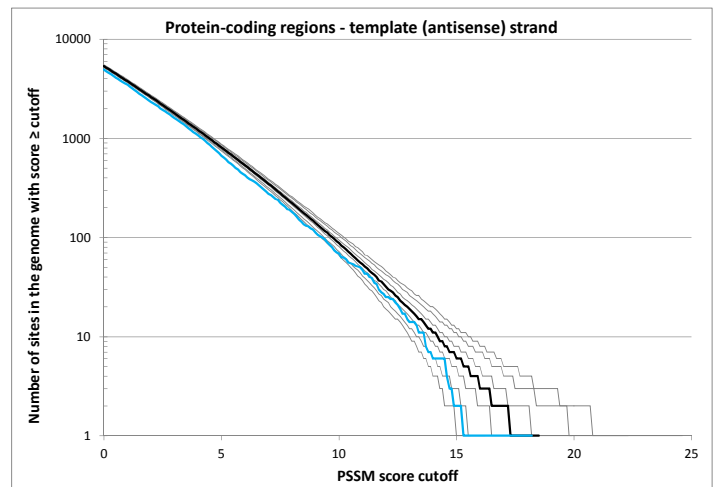

# Test: *C. difficile* LexA in *E. coli* genome

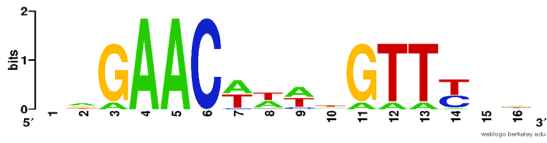

Motif length: 16  
Motif information content: 15.44 bits  
Max possible PSSM score: 20.16  
Motif GC content: 31.62 %  
Genome GC content: 50.79 %

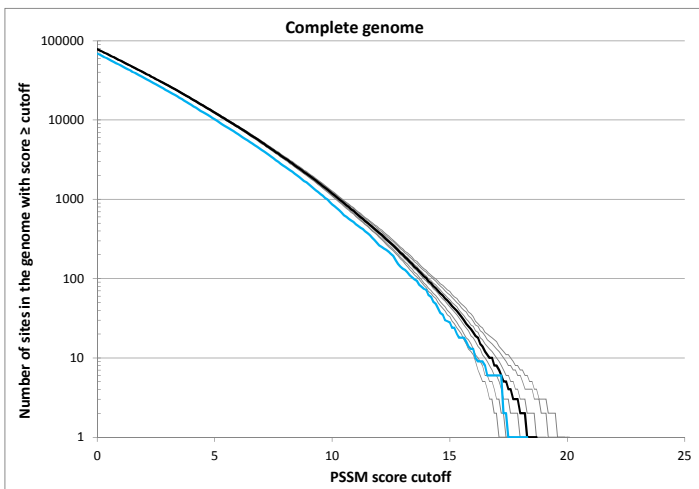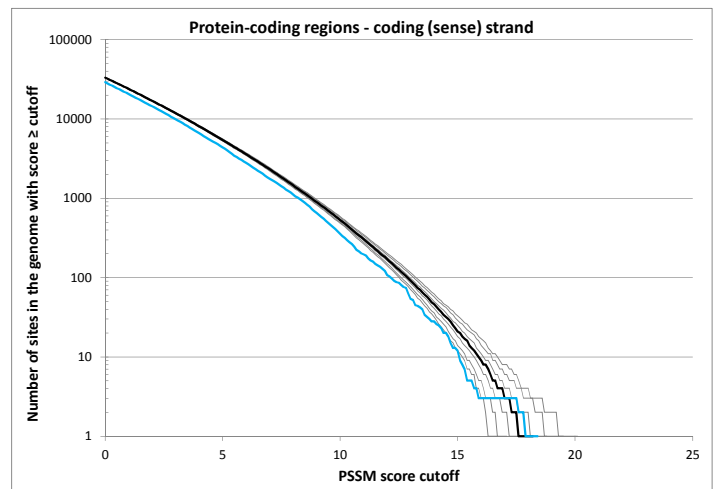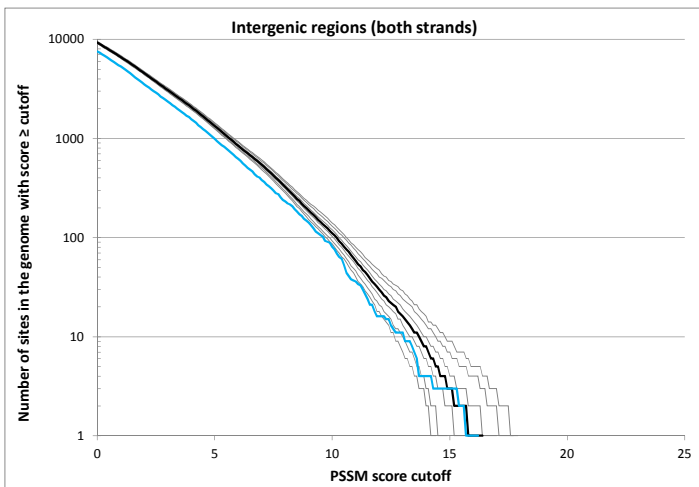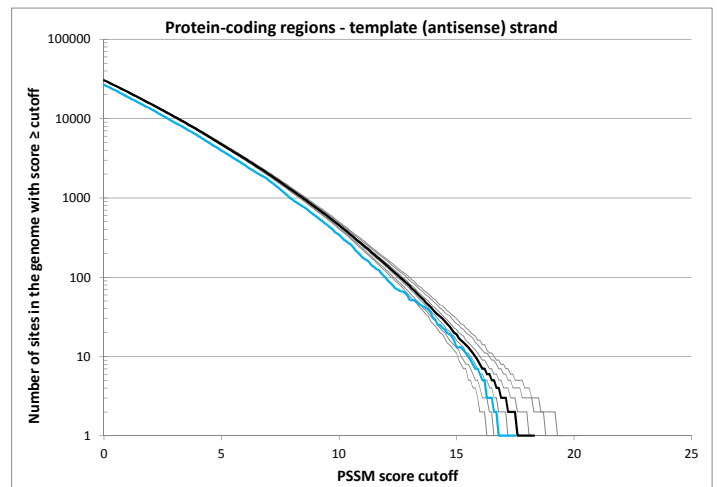

# Test: *C. difficile* LexA in *M. tuberculosis* genome

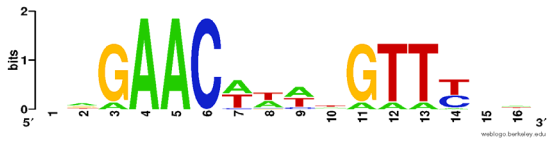

Motif length: 16  
Motif information content: 15.44 bits  
Max possible PSSM score: 25.64  
Motif GC content: 31.62 %  
Genome GC content: 65.61 %

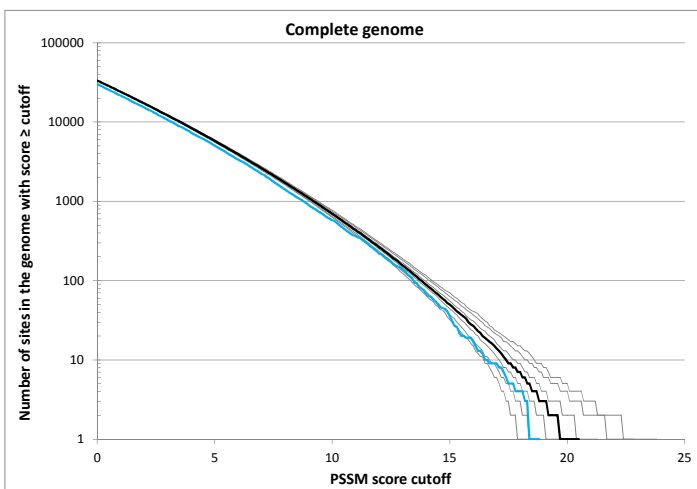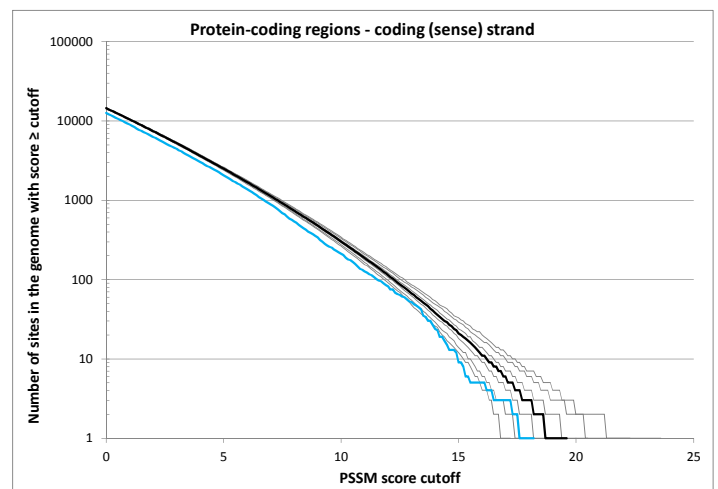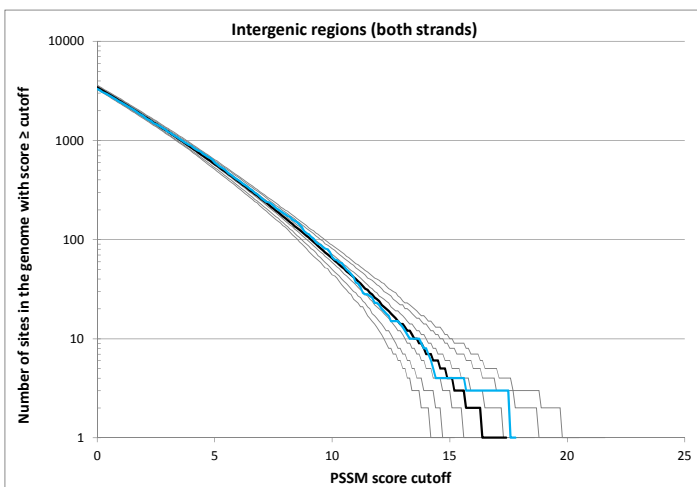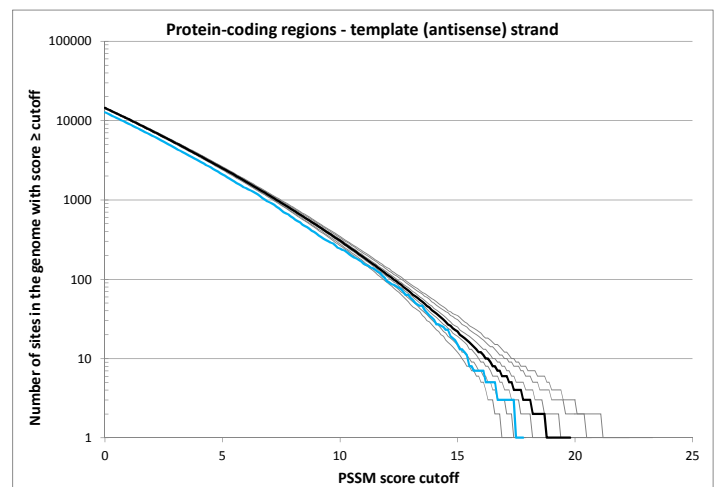

# Test: *M. tuberculosis* LexA in *E. coli* genome

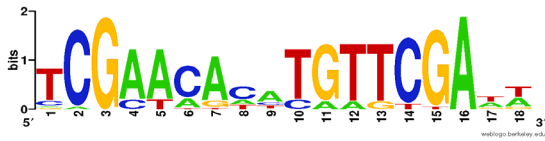

Motif length: 18  
Motif information content: 22.54 bits  
Max possible PSSM score: 28.80  
Motif GC content: 40.58 %  
Genome GC content: 50.79 %

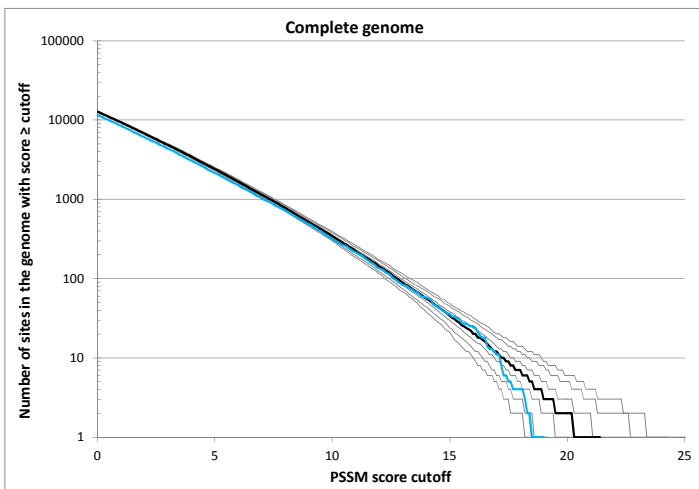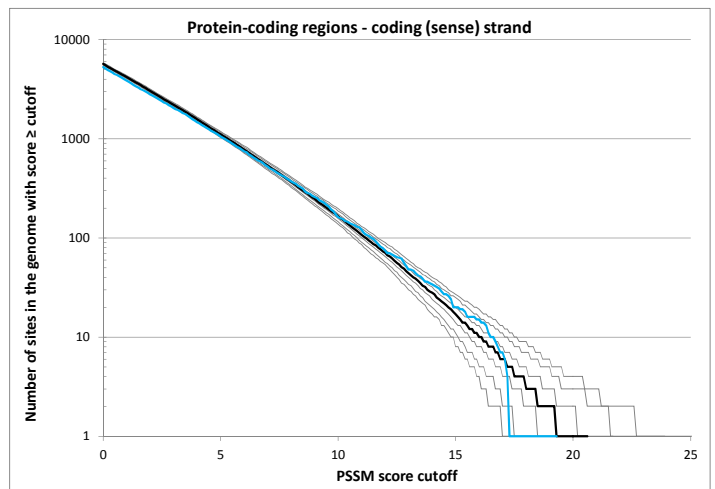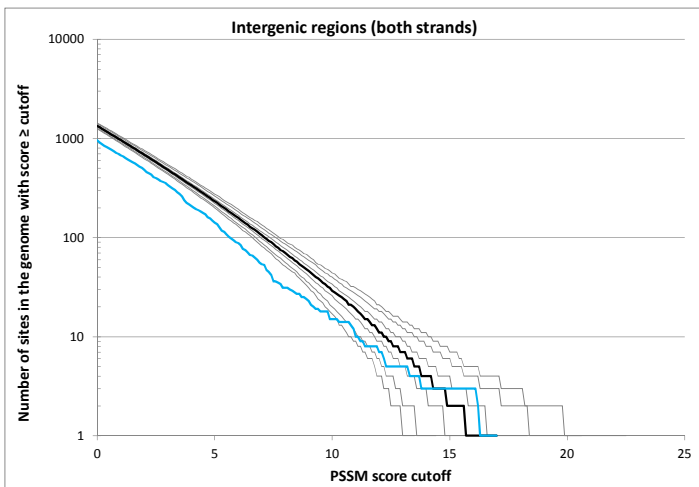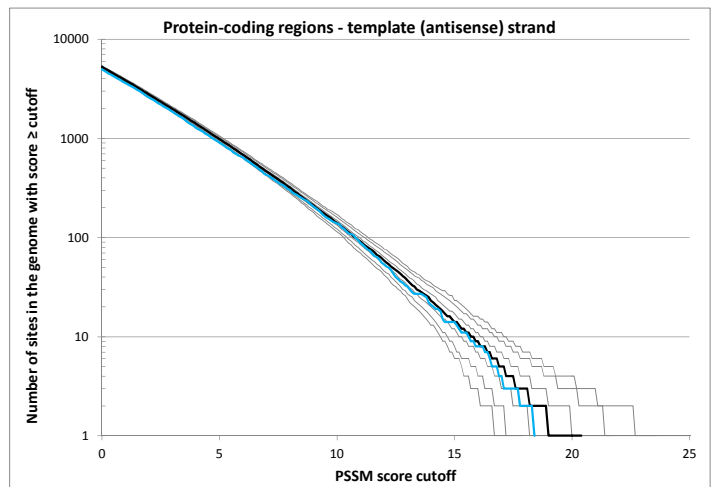

# Test: *M. tuberculosis* LexA in *C. difficile* genome



Motif length: 18  
Motif information content: 22.54 bits  
Max possible PSSM score: 28.74  
Motif GC content: 40.58 %  
Genome GC content: 28.81 %

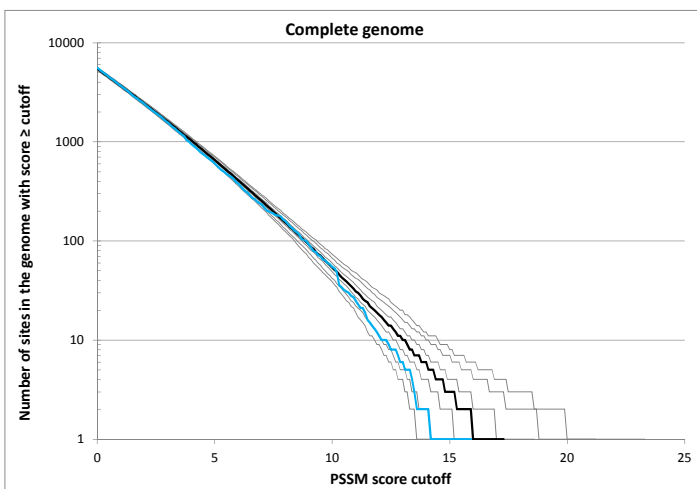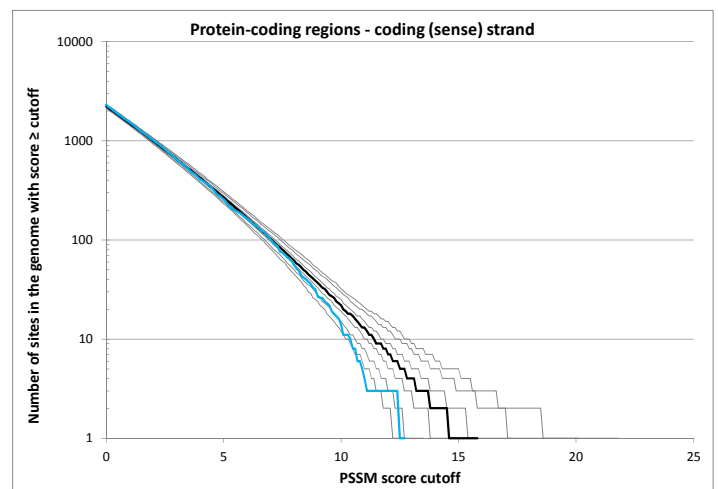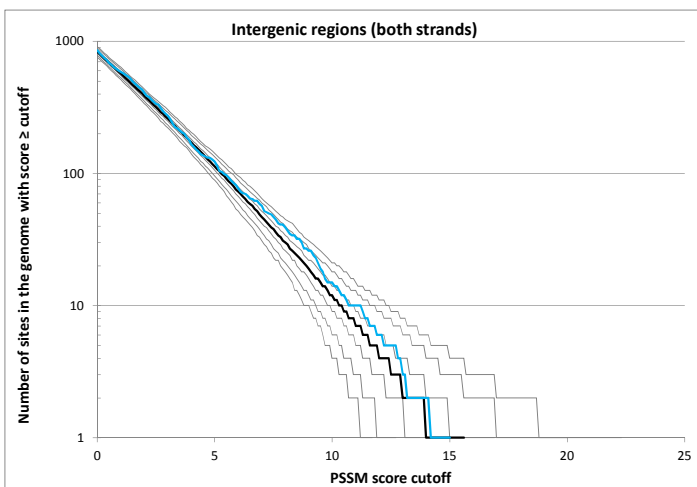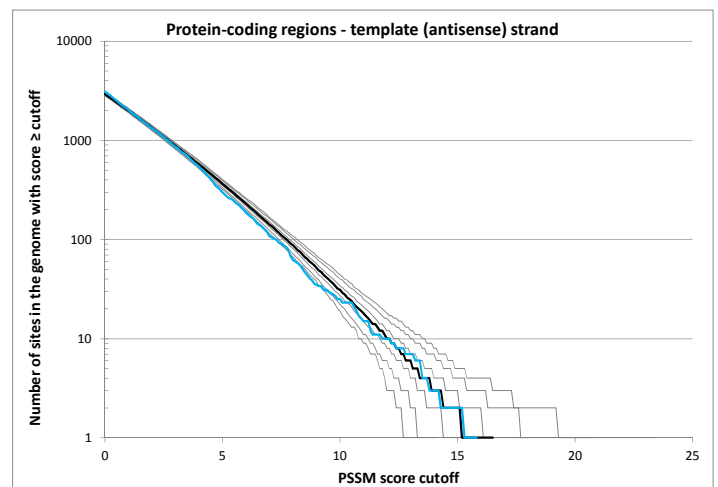

# Test: *E. coli* FNR in *R. sphaeroides* genome

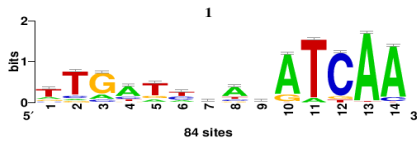

Motif length: 14  
Motif information content: 11.06 bits  
Max possible PSSM score: 26.26  
Motif GC content: 30.10 %  
Genome GC content: 69.01 %

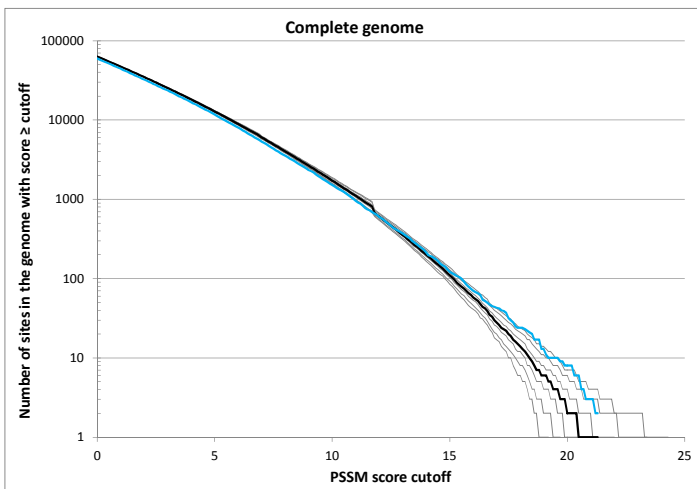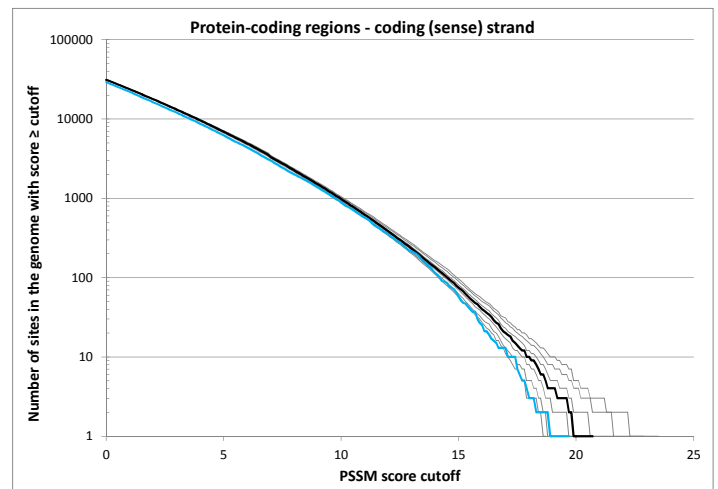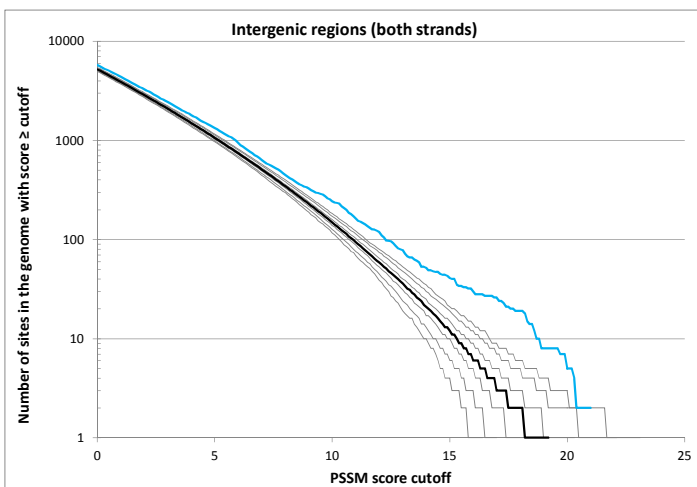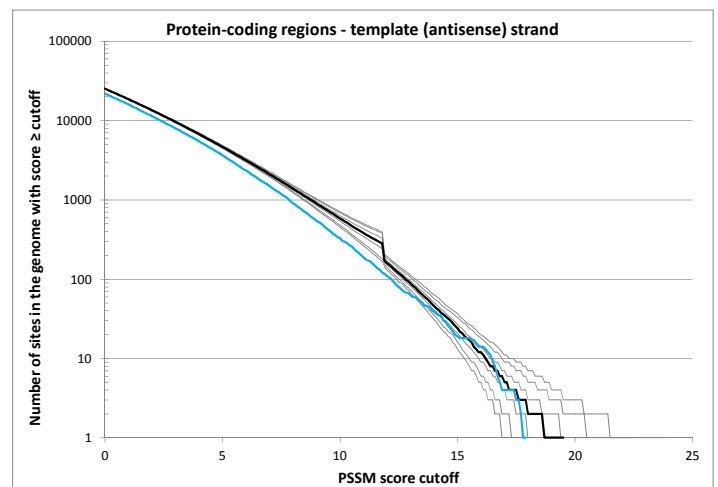

# Test: *R. sphaeroides* FNR in *E. coli* genome

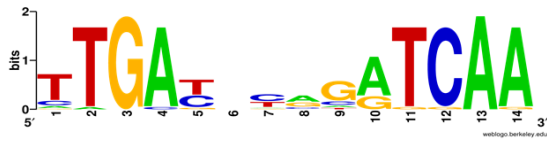

Motif length: 14  
Motif information content: 17.13 bits  
Max possible PSSM score: 21.49  
Motif GC content: 39.95 %  
Genome GC content: 50.79 %

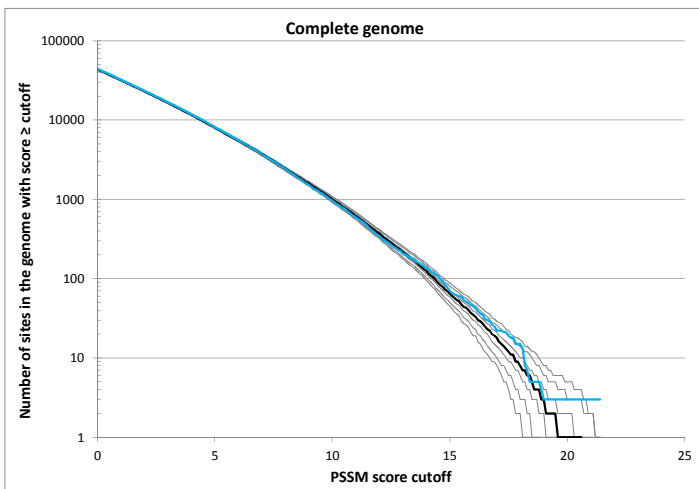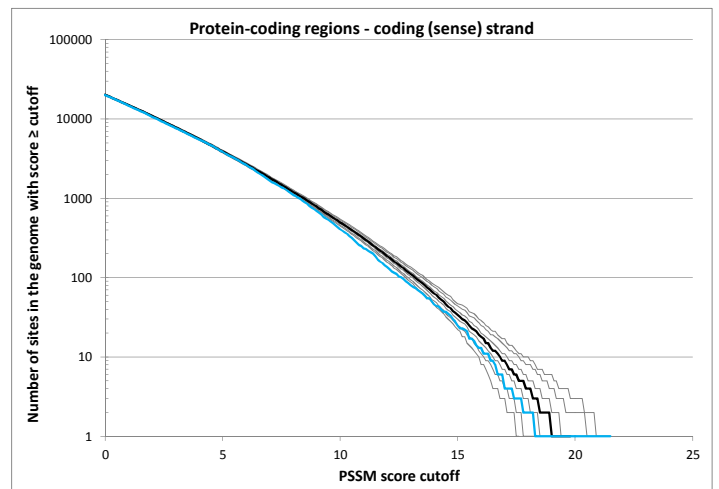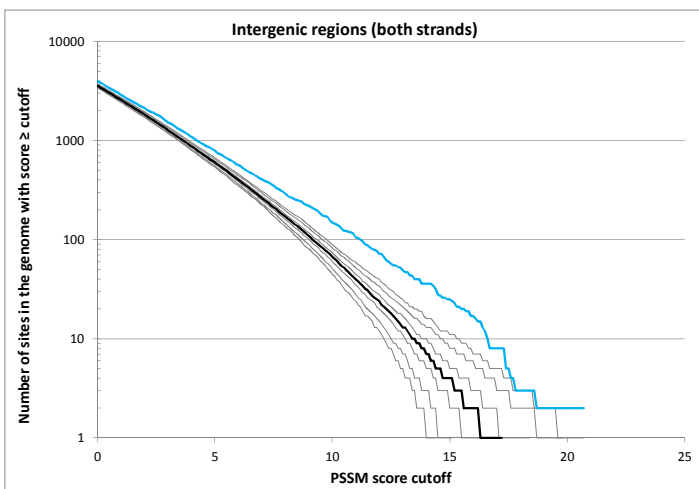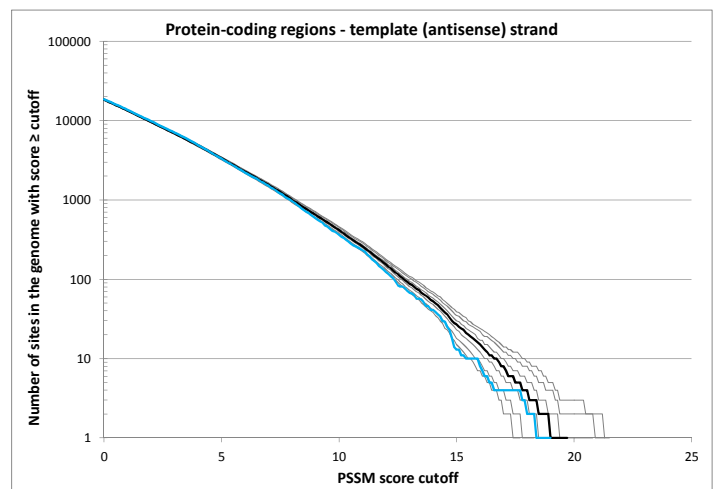



# Test: FNR (*E. coli*) - only 20 sites most similar to the consensus

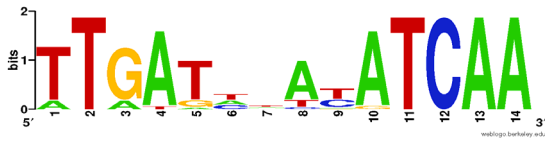

Motif length: 14  
Motif information content: 19.61 bits  
Max possible PSSM score: 22.68  
Motif GC content: 22.14 %  
Genome GC content: 50.79 %

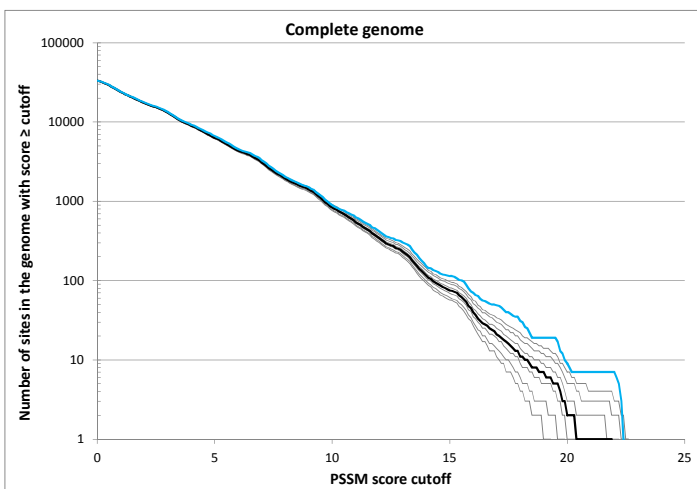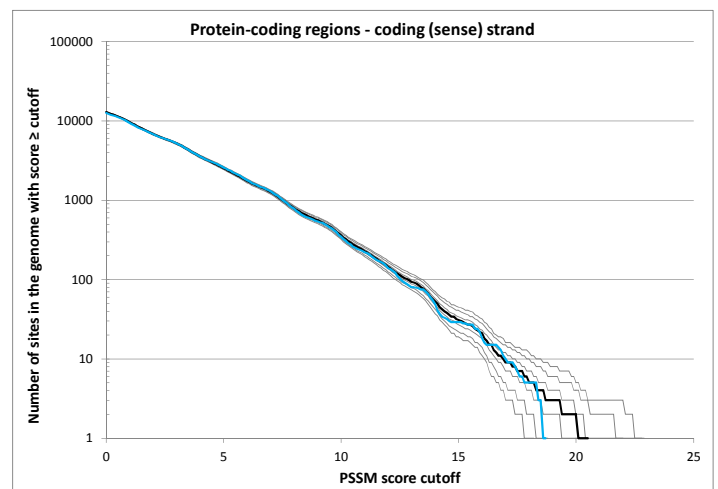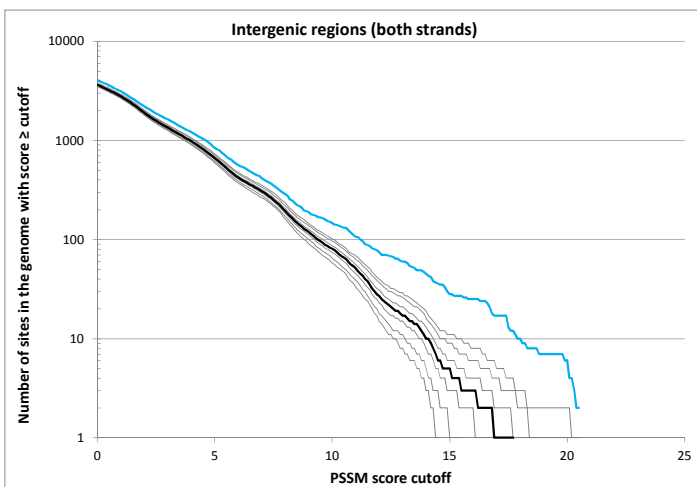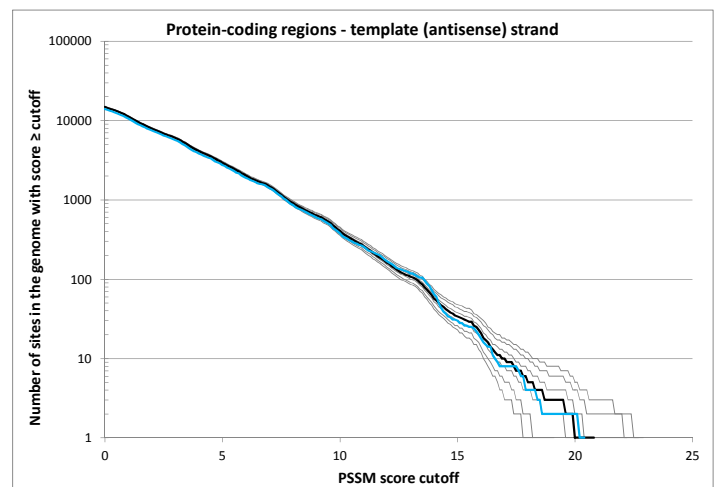

Supplement: 12862_2019_1381_MOESM2_ESM.pdf [file 12862_2019_1381_MOESM2_ESM.pdf]
